# Supplementary material for: MHC class I evolution; from Northern pike to salmonids
Source: Research Square preprint supplement (doi:10.21203/rs.3.rs-36819/v4), 2020-12-11
Supplement: Supplementary file [file 24728eb7dc0673e65b2bddf1.pdf]

## Additional file 4 (AF4). Deduced MHC class I amino acid sequences from selected salmonids

Deduced amino acid sequences from *Salvelinus alpinus/malma* (Saal), *Oncorhynchus nerka* (Onne), *Oncorhynchus kisutch* (Onki), *Oncorhynchus tshawytscha* (Onts), *Oncorhynchus mykiss* (Onmy), *Salmo trutta* (Satr), *Salmo salar* (Sasa) and *Esox lucius* (Eslu) originating from the NCBI genomes described in main text Material and Methods. When available, the GenBank protein accession number and chromosomal location is provided for each sequence. Pseudogenes defined as having internal stop codons are shown using a ps extension to gene name while partial gene names have been given a pt extension.

### AF4.1 Deduced U lineage MHC I amino acid sequences

```
>Saal-UBA XP_023832378.1 chr.31 NC_036870:9.674.553-9.682.654
MNVNMGFVLLVLGIGLLHTASAVTHSLNYFYTASSEIPNFPEFVALSMVDGVQTVVYDS
NSQRAVVKQDWMNKATETLPRYWETVTFESFMGNQPNFKANIDIAKQRFNQSGGVHISQRM
YGCEWNETGATGGYFQDGYDGEDFLALDLKTKTWIAPKPQAVITKYKLDSDTAQNEYLK
NYFTQECIEWLKKYLDYGKSTLMRTVVRPSVSLQKTPSSPVTCHATGFYPSGVMVFWQKE
RQDHEDVEHGETLQNDGTFQKSTHLTVTPEEWKKTQYQCVVQVTGIKEDIITVLTESE
IKTNWNATNFVPIIGGVVALLLVIVAVVVGVVVIWKKKSKKGFVPASTSDTDSSENSGRAAQQ
I
>Saal-UCA XP_023830372.1 chr.30 NC_036869:18.153.603-18.167.426
MKVFILMFLGIGHLYEAFGTIHSKHFYTASSEVSNFPKVVVGMVDGVHMHVHDSNSQK
VVPEQDWMKQTDAEFWESERENFFDSQQSFKAEVHILKQRFNQSGGVHVLQYIYGCSLDN
ESEQKEGFGHLGYNGENFLEYDMKKSWSKSLKQADFMQDKWNSDISRLNFWKIFYFTQTC
IECLKKQVVNGKSIIMRTVPPSVSLQKTPSSPVTCHATGFYPSGVMVSWQKDGNDQHED
VEHGEILLNDDSEFQKSTHLRVTPEEWKNNKYQCVVQITGIKEYFIKVLTESEIQTNWVD
PAPIIGGVVALLLVIVVVVVGVVVIWKKNSNKGFLPASTDEDNSVRGFLKT
>Saal-UDA XP_023990448.1 chr.30 NC_036869:18.081.405-18.087.963
MKGFIILMFLGIVHLHEAFGAIHCLTHFYTASSDIPNFPEFVVVGMVDGVQIVHYDSNSQK
VVPKQDWMKQTDAEFWESEREKFFNSQQSFKVEVHILMQRFNQSGGVHILQYIYGCSLDN
ESEQKEGFGQLRYNGENFLVYDMKTLAWKSLKQADFMQDKWNHDSRLVFWFRIYFTQTC
IECLKKQVVNGKSIIMRTVPPSVSLQKTLSSPVTCHATGFYPSGVMVWQKDGQDHED
VEHGQXLPNDGTFQKSTHLTVTPEEWKNNKYQCVVQVTGIKEDFIKVLTESEIQTSWGK
TNRGTNDPNTIGSAPIIGVAVALLVVVVVVVGVVVIWKKKREKGFVPASSDSDTSENSWKG
AQKT
>Saal-UEA XP_023830369.1 chr.30 NC_036869:18.033.964-18.036.877
MISFCLLFLWIPITSAAPHSMKYLYTAVSGDTEFPEFTVVGLLDDHQFVYFNSNTKTLVL
TTEWMKKKAGKYRKYLYTEPLINQHEGFKNLITFAKQFNQTQSKGVHTIHNLYGCEWND
ETELKDYFHHYGYDGEDFISLDMKTVRWITFVQQADTIKQKWDNSKDLHYLKWYFTKEC
IDTLKYLNFASSVLKRIVPPSVSLQKTPSSPVTCHATGFYPSGVTVSWQKDGQEQHED
VLHGEILPNDXTFQKSAHLTMDCEWKNNNYTCVVEHKENIIAIRLDQSVIKTNSDKPP
ESGPIIIGVVAVILLALITIIAGFIMWNRKRTVSDDGFNPSMTQQNQIQLEVSLSLIKQE
RSRENRTFIEGGEAS
>Saal-UFA XP_023830370.1 chr.30 NC_036869:18.000.010-18.018.603
MKGFIILVVLGVGLLHCASAATHSLRYVYATSGIPAFPEFVTVGLVNGEPISYDYSVIRR
ETPRQDMAKSEGPDYWERETLISIGAEQTFKVGIENIKPRFNQTGGVHTWVNMYGCEWD
EDTGVTKGFNFQFGYDGEDFVAFDLKTKTWIAPTQAVITKHKWERDIAYNEQRKYLYTQT
CIEWLKKYLDYGKSTLMRTVPPSVSLQKTPSSPVTCHATGFYPSGVMVFWQKDGQDQHE
DVEHGETLPNDGTFQKSTHLTVTPEEWKNNKYRCVVQVTGIKEDFIKVLTESEIQTNWG
KTNRGANDPNTIGLAPIIGVAVALLVVVAVVVGVVMMKKKSKTGFVPASTSDTDSSENSGK
GAQKT
>Saal-UGA XP_023830918.1 chr.30 NC_036869:17.644.777-17.650.392
MKTRLISAMKTYFILLFCIHGALSVAHFLRYFYTASSGIPDFPEFVDMGMVNDQVISRYD
SITKRKVPKQRWMEKVFDDQYWDSTTENLREAEQVFKANIQIAQKRFNDTGGMHINQDMY
```

#### AF4. Deduced amino acid sequences

GCEWDDDETGFTEGFHHVGYNGKDLLAFDLQRATWIAFVFPQAVHSMKMWESDKSAIEMERH  
YLTQTCIXWLKMYLNYGKSTLQRTXPPSVSLLQKTPSSPVTCHATGFYPSGVMVFWQKDG  
QEQHEDVEHGEIILPNDGTFQKSTHLTVTPEEWKNNKYQCQVQVGTGKEDFIEVLTESEI  
QTSWGKTNRGDPAPNIVPIIGVVALLLVVVVGVVIWKKKSKKGFVPASTSDTDSSENSGKX  
AQKI

>Saal-UXA XP\_023996926.1 NW\_019943742:11.208-50.680  
MKDFILLVGLVGLLHTASAVTHSMKYFYTGSSSEVSNFPEFVVVGMVDGVQMVHYDSNSQR  
AVPKQDWMTRHTDTQYWERNTGIFMNSQQIFKVDINTLKQRFNQSGGVHTLMEYGCQEW  
EDTGVTEVFVKQFGYDGEDFVAFDLKTKTWIAPTQAVITKHKWDNDMSYNEYWKNYLTQT  
CIEWLKKYLDYGKSTLKRTPSSVSLQKTPSSPVTCHATGFYPSGVMVSWQKEGQNHHE  
DVEHGETLHNDGTFQKSTHLTVTPEEWKNNKYQCQVQVAGIKEDFIKVLTESEIQTNWG  
KTNRGANDPNTIGSIAMEPVIGVAVALLVIVVIVVVGVVIWRKMKSEKGVRRREGCFVPTS  
TSDTDSSENSWKGQKT

>Saal-UZA.1 XP\_023997137.1 NW\_019943825:6.883-38.250  
MKGFIILMFLGIVHLHEAFGAIHSLMHFYTASSDIPSPFPEFMVEMVDDVQMVHYDSNSQK  
VVPKQDWMKQTDAGFWESEREKFFHSQQSFKVEVHILMQRFNQSGGVHILQYIYGCSLDN  
ESEQKEGFGQLRNGENFLEYDMNDLTKWLSLQKQADFMQDKWNSDSSRLVFWKIYFTQTC  
IECLKKQVNVNGKSIILRRTVPPSVSLLQKTPSSPVTCHATGFYPSGVMVVIKDGQEHHE  
VEYGETLQNDGTFQKSTHLTVKPEEWKNNKYQCQVQVGTGKEDFIKVLTESEIQTNRGD  
PAPNFVPIIGVVALLLVVVVVVVVVGVVIWKKRSKKGFIPTSDSDSENSGKGAQKI

>Saal-UZA.2 XP\_023997139.1 NW\_019943825:66.739-90.643  
MKGFLVLLVGLIGLLHTASAVTHSLKYFYTASSGVNTFPEFVGVGMVDDVQMVHYDSNSQR  
VVCKQDWMNKQPDQYWEREKVNLLGSQQIFKVNINTLKQRFNQSGGVHVFQKMYGCQEW  
DESGATEGFNQFGFDDEFVALDLKTETWTAPTQAVITKHKWENLSANTKHWKNYHTQ  
TCIEWLKKYLDYGKSTLKRTPSSVSLQKTPSSPVTCHATGFYPSRVKVVVIKDGQEH  
EDVENGETLPNDGTFQKSTHLTVTPEEWKNNKYQCQVQVGTGKEDFIKVLTESEIQT  
GKTNRDNTVNPNTVGSAPVIGVAVALLVVVVAVVVGVVIWKK

>Saal-UHA1 XP\_023837329.1 chr.36 NC\_036875:38.986.008-38.984.679  
VYVTVLLLFPSINLYLCLPIFFLATHSLKYFYTALPQSTGLPEFSAVAYLDEEPIYSYDS  
STKEVVAQQEWSVKEAVDPDFWGRSTHILMETEKVFKDNMNTARARFNQTSHTLQKMYSC  
EWDEETGATEGREQYGGEDFLFDLKNRWIAPVRQGLITKMKWDDNVPKLEAKIHYL  
THTCIEWLKKYVYFRRSMLEKTSYPTCHATGFYQKRPISLCPEDLQKYDYTCTVHTLE  
VMCVLIANRDSIYSNSRNRQG

>Saal-UHA2 chr.36 no predicted orf NC\_036875:39.022.250-39.028.661  
MYTVSNRIVHISTLLVYLIPIVTCAGEHSLKYFYTALPQSTGLPEFSAVAYLDEEPIYSY  
DSSTKEVVARQEWVEGAVDPDFWRNNTAVRGMKRLVLRQDVNSMDMRDFLLFDLKNKR  
WIAFVWQGLITKIKWDANVTVLPQVSLQKNLSYPTCHATGFYPNAIMIFWRRDGVV  
DDVVHEETLPNGDGTQYKRTHLTVFPEDLQKHDTCTVQHSDDVLSANRDSIRRNTQG

>Onne-UBA XP\_029514050.1 chr.4 NC\_042538:45.484.905-45.509.590  
MNVKMNGFISLVLIGLLHTASAATHSLKYFYTAVSGDIDYPEFTAVGLVDNGQFMYFDS  
STKTAVPKTEWMMKREGADYWDSTQGLIGEHQTFKVNITLTKDRFNQSKSTGVHVQRM  
GCEWDDDSGATEGFYGGEDFIAFDLKTTKWIAAPQAVITKLVKWDNSNTANNEHRKN  
YYTQECIDWLKKYMDYKSTLMRTVPSVSLFQKTSSSPVTCHATGFYPSDVMVSWQKDG  
QDHHEDVEYGETLPNDGTFQKSIHLTMTPEDRKNNKYQCQVQVKGKIDDFIRVLPDQDA  
TNVVPPIIGVVALLLVVVAVVVCVVIWKKRSKKGFPVPTSDTSDNSGRAAPQI

>Onne-UMApT chr.07 NC\_042541:7.582.558-7.584.184  
YSGTSGIPDLPEFVTLVLVNPNPFSYYSNISRMTKQEWIAKSEGPDYWERNTQLYIGN  
ELLPKTNLVVSQQRNFQTVGHISQVMYGCWDEETGITDVLVQYGHDRDFISFDLKRMT  
WVTPKPQAVITKHKYNIHAVNEGKHYLTHRCITCLKKYLQNGKSTPQRIVSILQKTPSSP  
VVTCHATGFYPRGVMVMRMGELDIHEDVKYGETLPNHDGIFQMRSRLTVDPKEWDDNNT

>Onne-UCA XP\_029519320.1 chr.7 NC\_042541:17.660.146-17.669.552  
MKGFIILMFLGIVHLHEAFVTHSLTHFYTASSGITNFPEFMVGMVDGVQMVHYDSNIQK  
AVPEQGWMMKQTDAEFWEKERDNLFDFQSFKAIEIATLKQHFNQSGGVHILQYMYGCSQDY  
ETEQTGFGQLGYNGEDFLEYDMKTLTWKSRKQANFMQDEWNSDTSRLLFWKNYFTQTC  
IECLKKQVNVNGKSTLMRTVPPSVSLLQKTPSSPVTCHATGFYPSGVMVFWQKYGKYQHED  
VENGEILVNDGTFQKSAHLTVTPEEWKNNKYQCQVQVGTGKEDLIKVLTESEIQTNWKD  
PAPNIIIIIGVVALLLVVVVGVVIWKKKKKGFVPASTNDTDSAYSGLLKT

>Onne-UDA XP\_029519318.1 chr.7 NC\_042541:17.635.043-17.646.967  
MKGFMMLMFMGIGHLYEAFVTHSLEHFYTASSELHNFPEFMVGMVDRVQMVHYDSNIQK  
VVPEKQDWMKQTDTEFEWKEKREFFYSQQSFKAIEIANLQHFNQSGGVHILQYMYGCSRDD  
ETEQTTERFGQLGYNGENFLEYDMKTLTWKSRKQAHFMQDEWNSDISRLDFWKNYFSQTC  
IDCLKKQVDKQKSTLMKTVPPSVSLLQKTPSSPVTCHATGFYPSGVMVFWQKDGQDHHED  
VENGETLPNDGTFQKSTHLTVTPEKWNQNYRCVQVGTGKEVFIKVLTESEIQTNWED

PAPNIIILIIIGGVVALLLVVGVVVIWKKKSKKGFVPASTSDTSDNSGKGVQKT  
 >Onne-UGA XP\_029519296.1 chr.7 NC\_042541:17.344.654-17.353.783  
 MKTRLIGAMKTYFIILFCIHGALS VKHSLRYFYTTSSSEIPAFPEFVDMGMVNDQVISRYD  
 SITKRKVPKQSWMETVFDQQYWDSTTKDLGSAESVFKTNIQIAQKRFNQTGGMHISQDMY  
 GCTWDDTEGFTGEGFHHIGYDGDLLAFDVKTATWIASVFPQALHSMKWEMDLSSIEIKKS  
 YLTQDCIKWLKYLKDYGKTTLQRTVPPSVSLLQKTPSSPVTCHATGFYPSGVMVSWQKDG  
 QEQHEDVENGETLPNDGDTFQKSTHLTVTPEEWKNNKYQCVVQVTGIKEDFIKVLTEFEI  
 QTNWGD PAPNIIILIIIGGVVALLLVVGVVVIWKKKSKKGFVPASSD TDWDKSGQGFL  
 >Onki-UCA XP\_031645085.1 chr.14 NC\_034187:55.902.447-55.906.191 dual orf  
 MKAFMLFMGIGHLHEAFVTHSLEHFYTASSELHNFPEFMVVMVDGVQMVHYDSNIQK  
 AVPEKDWKQTDTEFEWEKKNFFYSQKSFKAEVANLQHLNQS GG VHI LQYMYGCSRDD  
 ETEQTEGFGQLGYNGENFLEYDMETLTWKS RKPQANFMQDEWNSDISRLGFWKNYFSQTC  
 IDCLKKQVDNGKSTLMRTVPPSVSLLQKTPSSPVTCHATGFYPSGVMVFWQKYGKYQHEG  
 VEHGEILFNDDETFQKSTHLTVMPPEEWKNNKYQCVVQVTGIKEDFIKVLTESEIQTNWKD  
 PAPNIVLYIGGVVAFLLVVVVVVVGVVIWKKKSK  
 >Onki-UEA XP\_031645085.1 chr.14 NC\_034187.2:55.926.414-55.927.642 dual orf  
 MISFCLLFLWIPTMSADPHSLKYIYTA VSGD TDFPEFTVVGLLDDQQFVHFGSNTKTLVN  
 DAEMNKTKYRELYNETLINQYEGFKNLITFAKKQFNQTQSKGVHTIQNL YGCEW NDE  
 TELQDYFHHYGYDGEDFISLDMKTVRWITSVQQADTIKQKWDDNSKDLHYLKYFTKECI  
 DTLKEYVNFASSVLKIVPPSVSLLQKTPSSLV TCHATGFYPSGVMVSWQKDGQEQHEDV  
 LHGEILPNGDGT FQSAHLTIDSEK WENNYTCVVEHKENIIAIRLNQSVIKTNSVKLLE  
 TVPIIIGGVVAVILLVTFIITRFIMWNRKSTASDDGSNPSMTQQNQIQLEVLSLQKQE  
 RSREKRTFIEGQ  
 >Onki-UGA XP\_031645087.1 chr.14 NC\_034187:56.227.506-56.231.443  
 MTAYILSTFSVTVRHSLRYFYTTSSSEIPAFPEFVDMGMVNDQVISHYDSITKRKVPKQSW  
 MEFFFNQYWDSTTENLRSAESVFKTNIQIAQKRFNQTGGI HISQDMY GCTWDDTEGFTG  
 GFHHIGCDGQDLLAFDVKTATWIASVFPQALHSMKWEMDLSSIESKSYLTQDCIEWLKK  
 YLDYGMTTLQRTVPPSVSLLQKTPSSPVTCHATGFYPSGVMVSWQKDGQEQHEDVENGET  
 LPNDGDTFQRSTHLKVMPEEWKNNKYQCVVQVTGIKEDFIKVLTEFEIQTNWGD PAPNII  
 PIIGGVVALLLVVGVVVIWKKKSKKGFVPARTSDTSDSENSGERSPDDLKNFCNI  
 RELKRTATEITNRNFPRL  
 >Onki-UMApT XP\_031645116.1 chr.14 NC\_034187:67.374.482-67.376.232  
 MCDLSDFESDMIVSASCLSLSGVHISQVMYGCEWDEETGITDVL FQYGH DREDFISFDLK  
 TMTWVTPKPQAVITKHKYDSNIAVNEG YKHYLTQR CITCLKKYLQNGKSTLQRT HVSPPV  
 SILQKTPSPVVTCHATGFYPRGVMVMRMRGEQDIHEDVKYGETLPNHGIFQIRSRLTV  
 DPKEWDNNNT  
 >Onki-UBA XP\_020361135.1 chr.17 NC\_034190.2:33.698.029-33.719.534  
 MKGIILLVGLIGLLHTASAVTHSLKYFYTTASSEVPNFPEFVVVGMVDGVQMVHYDSNSQR  
 AVPKQDWNKAADPQYWERNTGNFKGSQQT FKANIDIVKQRFNQSGGVHIVQMMYGC EW D  
 DETGVTEGFEQHG YDGEDFIAFDLKTTKWIAPMPQAVITKHKLDSNTANNEYKKNYTTQT  
 CIDWLKKYVDYKSTLMRTVCPVS LFKQTS SSVLTCHATGFYPSDVMVSWQKDGQDHHE  
 DVEYGETLPNDGDTFQKSSHLTVTPEDRKNSKYQCVVQVTGIKEDFIKVLPLDANVVP  
 IIVGVVALLLVVAVVGVV IWRKRSKKG FVPTSTSDTSDNSGRAAPQI  
 >Onki-UHA XP\_020316994.1 chr.26 NC\_034199:42.842.475-42.852.669  
 MVGQIILVWLCLNLP TANSATHSLKYFYTALPQSTGLPEFSAVTYLDEEPIYFYDSSTKE  
 VVARQEWVKEAVDPDFWRRNTQILKETEKVFKNNMDTARDRFNQTSARTLQVMYSCESVE  
 ETGATEGHEQYGYGGEDFLFDLKNERWIAPVRQGHITKIKWDANVPK LKAKIHYLTHTC  
 NEWLNKYVSNRRRMLQRTAPPQVTLFQKEPFYRV TCHATGFYPNAIMI FWRRDGV DVHGD  
 VVHEETLPNGDGT YQKRTHLTVSPEDLQKH DYKCTVKHSGNDV VLSANRDSIRSNSRNTQ  
 GVSIIITINMVLMLVILAFMVTVLV LKTRTRDCKGKEPTTGKEKQCPISHLEKNVILLNNS  
 KPAEMEKS KLSHSADTLQCPTQDTTGS DRTSNRSRTISSSSSGSDDSGDSTTPLVKKL  
 >OntS-UHA XP\_024258185.1 NW\_020128834:520.036-527.062  
 MRSYFPPEVFLHSAPTGLPEFSAVTYLDEEPIYFYDSSTKEVVARQEWVKEAVDPDFWRR  
 NTQILKETEKV LKNNIATARDRFNQTSARTLQVMYSC EWVEETGATEGHEQYGYGGEDFL  
 LFDLKNERWIAPVRQGHITKIKWDANVPKLEAKVHYLTHTCNEWLNKYVSNRRRMLQRTA  
 PPQVTLFQKEPSNPVTCHATGFYPNAIMI FWRRDGV DVHGDVVHEETLPNGDGT YQKRTH  
 LTVSPEDLQKH DYKCTVKHSGNEV VLSANRDSIRSNSRNTQ GVSIIITINMVLMLVILAF  
 MVTVLV LKRRRDCCKGKEPTTGKEKQCPISHLEKNV LLLNNSKPAEMEKS KLSHSADTLQC  
 PTQDTTGS DRIRTLSSSSSGSDDSDSTTPLVKKL  
 >OntS-UCApT XP\_024251646.1 chr.31 NC\_037127:27.243.272.27.248.291  
 MVHYDSNIQKAVPEKDWKQTDTEFEWEKERENFFYSQQSFKAEVANLQHLNQS GG VHI LQ  
 YMYGCSRDDETEQTEGFGQLGYNGENFLEYDMKTLTWKS RKPQANFMQDEWNSDISRLGF  
 WKNYFSQTCIDCLKKQVDNGKSTLMRTVPPSVSLLQKTPSSPVTCHATGFYPSGVMVFWQ

AF4. Deduced amino acid sequences

KYGKYQHEDVEHGEILFNDDETFQKSTHLTVTPEGWKNNNKYQCVVQVTGIKEVFIKVLTESEIQTNWKDPSPNIVLHIGVVVALLLVVAVGVIIWKSCKGFVPASTS  
 >Onts-UEA XP\_024251644.1 chr.31 NC\_037127:27.226.332-27.228.596  
 MISFCLLFLWIPITSAADPHSLKYLITAVSGDITDFPEFVGLLDDQQFVHFGSNTKTLVN  
 DAEMWNTKTEKYRELYTEPLINQYEGFKNLITFAKKQFNQTQSKGVHTIQNLYGCEWDE  
 TELQDYFHGYDGEDFISLDMKTVRWITSVQQADTIKQKWDNSKDLHYLKWYFTKECI  
 DTLKKYVNFASSVLKIVPPSVSLQKTPSSPVTCHATGFYPSGVMVSWQKDGQEQHEDV  
 LHGEILPNDGDTFQKSAHLTIDSEKWNENNYTCVCLYVCMYVCLSVLSLSLSQERSREK  
 RTFIEGQ  
 >Onts-UMaps no gene prediction chr.31 NC\_037127:16.450.518-16.449.323  
 YSGTSGIPDLPEFVTLVLVNGNLFYDSNISRMTH\*QEWIAKSEGPDYWERNTQLYIGN  
 ELLTKTNLVVSQQRFNQTGVHISQVMYGCWDEENGITDVLVQYGHDRNFISFDLKTMT  
 WVTPKPQAVITKHKYDSNIAVNEGKHYLTQRCITCKKYLQNGKSTLQRIVSILQKTPP  
 SPVVTCHATGFYPRMVMRMRGEQDSDHEDVKY\*ETLPNHDGIFQIRSRLTVDPKEWNNNT  
 >Onts-U1pt XP\_024256602.1 NW\_020128813:6.051.676-6.056.695  
 MVHYDSNIQKAVPEKDWKQTDTEFWEKERENFFYSQQSFKAEVANLQHLNQSGLVHILQ  
 YMYGCSRDDETEGLGQYDGEDFISLDMKTVRWITSVQQADTIKQKWDNSKDLHYLKWYFTKECI  
 DTLKKYVNFASSVLKIVPPSVSLQKTPSSPVTCHATGFYPSGVMVSWQKDGQEQHEDV  
 LHGEILPNDGDTFQKSAHLTIDSEKWNENNYTCVCLYVCMYVCLSVLSLSLSQERSREK  
 RTFIEGQ  
 >Onts-U2 (UEA) XP\_024256601.1 NW\_020128813:6.071.372-6.073.634  
 MISFCLLFLWIPITSAADPHSLKYLITAVSGDITDFPEFVGLLDDQQFVHFGSNTKTLVN  
 DAEMWNTKTEKYRELYTEPLINQYEGFKNLITFAKKQFNQTQSKGVHTIQNLYGCEWDE  
 TELQDYFHGYDGEDFISLDMKTVRWITSVQQADTIKQKWDNSKDLHYLKWYFTKECI  
 DTLKKYVNFASSVLKIVPPSVSLQKTPSSPVTCHATGFYPSGVMVSWQKDGQEQHEDV  
 LHGEILPNDGDTFQKSAHLTIDSEKWNENNYTCVCLYVCMYVCLSVLSLSLSQERSREK  
 RTFIEGQ  
 >Onts-UBA XP\_024297406.1 chr.13 NC\_037109:26.068.285-26.090.507  
 MKGIIILLVGLIGLLHTASAVTHSLKYFFTASSEVPNFPEFVVMVDGVQMVHYDSNSQR  
 AVPKQDWNKAADPQYWERNTGNCKGNQQTTFKANIDIAKQRFNQSGLVHILQYMYGCELG  
 DDGITRGDCQYGYDGAFLSLDKSTLTWTAANQKAVITKLLKLDATGAVANNYKNYLENTC  
 IEWLKKYVNFVKDTERLKRVRPSVSLQKTPSSPVTCHATGFYPSGVMVSWQKDGQEQHGD  
 VEHGEILQNDGDTFQKSTHLTVTPEEWKNNNKYQCVVQLAGIEDDITKVLIESEIQTNFGK  
 TNRGSDNPNTIGLIIGGVIALLVIIAVVGVVWKKKKNKGFVPASTSDTDSSENSGKGIQK  
 I  
 >Onmy-UBA XP\_021427673.1 chr.18 NC\_035094:33.174.619-33.200.831  
 MNVKNMGFISLVLIGLLHTASAATHSLKYFYTAVSGDIDFPEFTAVGLVDKGFMYFDS  
 STKTAVPKTEWMMKREGADYWRQTQGLIGAHQTFKVNITQTLKDRFNQSKSTGVHVFQWY  
 GCEWDDAEGVTEGFDQYGYDGEDFIAFDLKTTKWIAPTQAVITKHKWDSNTARNEQKN  
 YTTQICIEWLKKYVDYGKSTLMRTVPPSVSLQKAPSSPVTCHATGFYPRDVMVSWQKDG  
 QDHHEDVEYGEILQNDGDTFQKSSHLTVTPEDRKNSKYQCVVQVKGIKEDFIGVLPDQDA  
 ANVVIIVGVVALLLVVAVVGVVWKRKSKGFVPASTSDTSDNSGRAVPQI  
 >Onmy-UDA XP\_021416252.1 chr.14 NC\_035090:28.622.921-28.630.059  
 MKGFILMVLGIVHLHEAFVTHSLTHFYTASSDIPNFPEFVVMVDGVQMVHYDSNIQK  
 VVPEQDWMKQTDAEFWEKERENLFYSQQSFKAEVATLKQHFNQSGGVHILQYMYGCSRDD  
 ETEQTEGFGQLGYNGENFLEYDMKTLTWKSLKQPNFMQDEWNSDTSRLLFWKNYFTQTC  
 IDCLKKQVDNRKSTLRRTPVPPSVSLQKTPSSPVTCHATGFYPSGVMVSWQKDGQEQHED  
 VENGETLPNDGDTFQKSTHLTVTPEEWKNNNKYQCVVQVTGIKEVFIKVLTESEIQTNWKD  
 PPNIVLHIGGVVALLLVVVVVVGVVWKKKSKGFVPASTNDTDTSVLSALLKQLKTVT  
 K  
 >Onmy-UCA XP\_021416249.1 chr.14 NC\_035090:28.598.436-28.609.464  
 MKGLMLFMGIGHLYEAFVTHSLKHFYTASSDIPNFPEFVVMVDGVQMVHYDSNSQK  
 AVPKQDWMKQTDAEFWEKERENFFYSQQSFKAEVATLKQHFNQSGGVHILQYMYGCSRDD  
 ETEQTEGFGQLGYNGENFLEYDMKTLTWKSRKQANFMQDEWNRDISRLGFWKIYFSQTC  
 IDCLKKQVDNGKSTLMRTVPPSVSLQKTPSSPVTCHATGFYPSGVMVSWQKDGQDHHED  
 VENGETLPNDGDTFQKSTHLTVTPEEWKNNNKYQCVVQVTGIKEDFIKVLTESEIQTNWKD  
 PPNIVPIIGGMVALLLVVVVVVGVVWKKKSKGFVPASTSDTSDNSGKGLLKI  
 >Onmy-UEA XP\_021416247.1 chr.14 NC\_035090:28.579.652-28.583.175  
 MISFCLLFLWIPITSAADPHSLKYLITAVSGDITDFPEFTVGLLDDQQFVHFGSNTKTLVN  
 DAEMWNTKTKYNDLYNEPLINQYEGFKNLITFAKKQFNQTQSKGVHTIQNLYGCEWDE  
 TELQDYFHGYDGEDFISLDMKTVRWITSVQQADTIKQKWDNSKDLHYLKWYFTKECI  
 DTLKKYVDFASSVLKIVPPSVSLQKTPSSPVTCHATGFYPSGVMVSWQKDGQEQHEDV  
 LHGEILLNGDGTQKSAHLTIDSEKWNENNYTCVVEHKENIIAIRLNQSVIKTNSVKPSE

YVPIIIIGVGVAVILLVLPVPIITFIMWNRKSTASDDGSNPSMTQQNQIQLEVSLSLIKQE  
EAEKRGPLLKDSEAS  
>Onmy-UGA XP\_021416226.1 chr.14 NC\_035090:28.270.887-28.279.730  
MKTRLIDAMKTNFIILFCIHGALSVRHSLRYFYTTSSSEIPAFPEFVDMGMVNDQVISHYD  
SITKRKVPKQSWMETFFDQOYWDSTTENLKSAESIFKTNIQIAQKRFNQTGGIHHISQDMY  
GCTWDEDETFTEGFHHIGYDQDLLTFDVKTATWIALVLPQALHSMKWEMDLSGIKSKKS  
YLTQDCIEWLKKYLDYGKTTLQRTVPPSVSLLQKTPSSPVTCHATGFYPSGVMVFWQKDG  
QEQHEDVENGETLPNDGTFQKSTHLTVTPEEWKNNKYQCQVQVTGIKEDFIKVLTEFEI  
QTNWGDPAAPNCIPIIGVVALLLVVVVGVVIWKKKSKKGFVPASSSDTSDNSGKGLLK  
I  
>Onmy-UHA XP\_021435429.1 chr.22 NC\_035098:41.948.847-41.957.334  
MYTVSNWIVHISTLLVTVYLIIPMTCAATHSLKYFYTVLPQSTGLPEFSAVTVLDEEPIYFY  
DSSTKEVVARQEWVKEAVDPDFWRRNTQILKETEKVLKNNMATARDRFNQTSAITLQVMY  
SCEWVEETGATEGHEQYGYGGEDFLFLDLKNERWIAPVRQGHITKIKWDANVPKLLKAKIH  
YLHTCNEWLNKYVSNRRRMLQRTVPPQVTLFQKEPSYPTCHATGFYPAIMIFWRRDG  
VEVHGVDVVHEETLPNGDGTQKRTHLAVSPEDLQKHDYKCTVKHSGNDVVLNANRDSIR  
GNSRNTQGVSIITINMVLISVILAFSVIVLVLRRTMYCKGKEPTTGKEKQCPISRLEK  
NVLLLNNSKPAEMEKSKLSHSADTLQCPTQDTTGSDRSRTISSGSSVGSDDSGDSTTPFV  
KKL  
>Onmy-UMAp No prediction chr.14 NC\_035090:17.785.888-17.784.737  
YSGTSGIPDLPEFVTVLVNNGNPFYNDNSNISRMTHKQEWIAKSEGPDYLERNIQLYIGN  
ELLTKTNLVVSQQLFNQTVGHVHYQVMYGCWEDEETGITDVLVQYGHDRDFISFDLKTMT  
WVTPKPQAVITKHKYDSNIAVNEGYKHILTQRCITCLKKYLQNGKSTLQRIVSILQKTPS  
SPVVTCHATGFYPRGVMVMRMRGEKDIHEDVKYGETLPNHGIFQMR  
>Satr-UBA XP\_029587594.1 chr.34 NC\_042990:10.539.672-10.557.140  
MKGFIILLVGLISLLHTASAAIHTLKNFYTAASGDISFPEFIIVGLVDNTPYLYFDSNTKT  
AVPKTEWMMKKSVDGADYWDSTQIGIGAHQTFKANIQVAKDRFNESKSTGVHVVQNMVYCE  
WDDEAGVTEGFDQYGYDGEDFLAFDLKTKTWIAPKPQAVITKLKWDNSMAWKEQKKNYLT  
QECIEWLKKYVDYGKSTLMRTVPPSVSLLQKTPSSPVTCHATGFYPSDVMVSWQKDGQDH  
HEDVEYGETLPNDGTFQKSIKTLVTPPEEWKNNKYQCQVQVKGLKEDFIKVLTDSDATNI  
VPIIGVVALLLVVAVVGVVIWKKKSKKGFVPTSTSDTSDNSGRAAQM  
>Satr-UCA XP\_029591425.1 chr.36 NC\_042992:32.893.949-32.904.220  
MKGVILMFLGIVHLREAFSVTHSLKYFSTASSNIPNFPEFMVVMVDGVQMVLYDSNSQK  
VVPKQDWINKQTDAAEFWESEREKFFDFQSFKAQVDILKQRFNQSGGVHVLQYIYGCSR  
DETEQRDGFGLGNGEDFLVYDMNTLTWNALQQANFMRDKWNNNDNRLVFWKTYFSQT  
CIECLKKQVNVNGKRPLMRTVPPSVSLLQKTPSSPVTCHATGFYPSGVMVWKKDGDHHE  
DVKHGETLPNDGTFQKSSHLKVTPEEWKNNKYQCQVQVTGIKEDFIKVLTESEIQTND  
DPAPNIVPIIGVVVALLLVVAVVGVVIWKKKSKKGFVPASTNDTDSAYSCKDLLKT  
>Satr-UDA XP\_029591428.1 chr.36 NC\_042992.1:32.865.446-32.880.246  
MKSFILIFLGIIVEVHETFGVTHSLKYFYTGSSSEVPNFPEFMVVMVDGVQMVLYDSNSQK  
VVPKQDWMNKQTDAAEFWESEREKFFDSQSFKAQVDILKQRFNQSGGVHVLQYIYGCSR  
DETEQRDGFGLGNGEDFLVYDMNTLTWNALQQANFMRDKWNNNDISRLGFWKIYFSQT  
CIECLKKQVNVNGKRPLMRTVPPSVSLLQKTPSSPVTCHATGFYPSGVMVWQKDGQEQHE  
DVKHGETLQNDGTFQKSTHLTVMPEEWKNNKYQCQVQVTGIKEDFIKVLTESEIKTNWD  
DPAPNIVLIIGVVVAILLQVAVVGVVIWKKKSKKGFVPASTSDTDSSENSGKGLLK  
>Satr-UEA XP\_029591421.1 chr.36 NC\_042992:32.837.610-32.841.400  
MISFCILFLWIPITSAAPHSMKYLYTAVSGDTGFPEFTVVGLLDDHQFVYFDSNTKTLVP  
TTEWMKEKAGEYYWDLYTEPLINQYEGFKNLIMFAKKQFNQTQSKGVHTIQNLVYCEWND  
GTELKDYFHHYGYDGEDFISLDMKTRWITSVQQADTIKQKWDNNSKDLHYLKYFTKEC  
IDTLKKYVNFASSILKRTVPPSVSLLQKTPSSPVTCHATGFYPRGVTVFWQKDGQDQHE  
VNGEILPNNDGTFQKRAHFTMDCEEWENNYTCVVEHKENIITIRLDQSVIKTNSVKPP  
ESGPIIIIGVVAVILLALITITAGFIMWNRKRTASDDGSNPSMTQQNQIQLEVSLSLIKQE  
RSREKWTFIGEQ  
>Satr-UFA XP\_029591426.1 chr.36 NC\_042992:32.791.364-32.726.587  
MKDIILLVGLIGILLHTASAVTHSMKYFYTASSEVSNFPEFVVMVDGVQMVHYDSNSQR  
TVPKQDWVKAADPQYWERNTGYFMNSQQIFKVDINTLQRFNQSGGVHALQRMVYCEMD  
DDGVTGRGYFYGYDADFLSLDKSTRWTAAANQKAVITKLKWDATGDNANIFKNYLENTC  
IEWLKKYVNYGKDTLERKVPVPPSVSLLQKTPSSPVTCHATGFYPSGVMVWQKDGQDHHED  
VENGEILPNNDGTFQKSAHLKVTPEEWKNNKYQCQVQVTGIKEDFIKVLQSEIHPNWGA  
NDPNTVGSAPIIGVVVALLLVVVVGVVMMWRKKKSEKGFVPASTSDTDSSENSGKGAQK  
I  
>Satr-UGA XP\_029591397.1 chr.36 NC\_042992.1:32.292.855-32.301.696  
MKTRLISAMKIYFVLLNCIHVALSGTHSLRYLYTSSSGISDFPEFVDMGMVNDQIISHYD

AF4. Deduced amino acid sequences

SITKRKVPKQSWMKNVFDQQYWDGTEDLRGAEKVFKNNIQTAQKRFNQGGMHISQDMY  
GCSWDDDETFTEGFHHIGYDGDQLLVFDLKRVTWIASVPPQALHSMKWEGDPSSIESEKR  
YLTQDCIVWLKYLEYKTTLQRTVPPSVSLLQKTPSSPVVTCCHATGFYPRGVKVVMMKDG  
QDHHEDVENGEILPNDGTFQKSTHLTVMPPEEWKNNKYQCVVQVTGITEDFIKVLTESEI  
QTNWGVNTIGSAPIIGVVVALLLVVVVVVVVGVVMWRKSKKGFVPASTSDTDSSENSGK  
GAQKI

>Satr-UHA XP\_029558050.1 chr.20 NC\_042976.1:8.942.111-8.953.982  
MYTVSNRIVHISTLLVTYLIPMTCAANHSLNYFYTALPQSTGLPEFTAVAYLDEELMYFY  
DSSTKEVVARQEWVKGAVDPEFWRRNTHILKENEQVFKDNMDTARDRFNQTSALVLQKMY  
GCDWDEATGATDGHEQYGYGGEDFLFDLKNRWIAPGRQGLITKMKWDANVIKLEAKIH  
YLTRTCIEWLKKYVSNRRRKLERTVPPQVTLQKEHSYPLTCHATGFYPNAIRILWGRDE  
VEIYDDVVHEETLPGNDGTYQKRIHLTVSPEDLQQHDTCTVQHVSGDDVVLSANRDSIR  
SNSRNTQVHYITIVLVPLAFSVIEPTAGKEKQCPTSLPEKSVHLLINGSDRTSNRSGT  
ISSGFNCLLTLTTLQKWKTSF

>Satr-UMAs chr.36 NC\_042992:20.989.044-20.988.357  
SGVHISQVM\*YGTWEDEETGITDVLVQYGHDRDFISFDLKTMTLVAPKHYLTQRCITFL  
KKYLQNGKSTLQRIVSILQKTPSSPVVTCCHATGFYPRGVMMWTRGEQDIYDDVKYGETL  
PNHVGTGFQMRSLTVDPKEWDNNNT

>Sasa-UBA\*0301 XP\_014032819.1 chr.27 NC\_027326:10.123.703-10.146.903  
MKCFILLLLGIALHSSAATHSLRVYVYATSGIPDFPEFVTVGLVNGEPIISYDSIIRRE  
TPRQDWMKTEGSDYQWESQTSIGSEQTFKANIDVAKQRFNQGGVHVNVQKMYGCEWDD  
ETGVTGEGFDQDGYDGEDFLAFDLKTLTWIAPTQAVITKLKWSNTAQNEYRKNYLTQTC  
IEWLKKYLDYKSTLMRTVPPSVSLLQKTPSSPVVTCCHATGFYPSGVMVSWQKDGQDHHED  
VEHGETLQNDGTFQKSSHLTVTPEEWKNNKYQCVVQVTGLQEDFIKVLTESEIKTNWND  
PNIVLIIGVVVALLLVVAVVVGVVWIKKSKKGFVPASTSDTSDNSGRAAQM

>Sasa-UDA1 XP\_013996967.1 chr.14 NC\_027313:50.985.016-50.996.125  
MKGFIILMFMGTCHLFEAFGVTHSLKYFYTASSGVNPFPEFMVGMVDGVQIDHYDSNSQR  
MVPKQDWMNKQTEAEYWERETGIAFDSQQVFKDDVNILKQRFNQSGGVHIVQKTYGCEWD  
DETQQTGGFTQHGVDGEDFLGYDMKTFTWIAPKQQAETRLKWNHDQAGLAFWHNYLTQT  
CIEWLKKYVDYKSTLRTVPPSVSLLQKTPSSPVVTCCHATGFYPSGVMVFWQKDGQEQHE  
VEHGETLQNDGTFQKSAHLTVTSEEWKINQYQCVVQVTGIKEDFIKVLTESEIQTNWDP  
APIIGVVVALLLVVVVVGVVWIKKSKKGE

>Sasa-UCA2ps chr.14 NC\_027313:51.036.934-51.045.017 Pseudogene  
MKGFIILMFMGTCHLFEAFGVTHSLKYFYTASSGVNPFPEFMVGMVDGVQIDHYDSNSQR  
MVPKQDWMNKQTEAEYWERETGIAFDSQQVFKADVDILKQRFNQSGGVHVLQYIYGCSWD  
DETEQRD\*GFGQLGYNGEDFLVYDMNTLTWKALKQQADVMDKWNDRISRLVFWKTYFSQ  
TCIECLKKQVVNGKSTLRTVPPSVSLLQKTPSSPVVTCCHATGFYPSGVMVFWQKDGQEQHE  
DVENGETLHNDGTFQKRTHLKVTSSEWKNNKYQCVVQVTGIKEDFIKVLTESEIQTNWD  
PAPIIVPIIGVVVALLLVVVVVGVVWIKKSKKGE

>Sasa-UCA1ps chr.14 NC\_027313:59.088.400-59.091.612 Pseudogene  
VTHSLKYFYTASSGVNPFPEFMVGMVDGVQIDHYDSNSQRMVPKQDWMNKQTEAEYWER  
ETGIAFDSQQVFKDDVNILKQRFNQSGGVHVLQYIYGCSWDDTEQRD\*GFGQLGYNGED  
FLVYDMNTLTWKALKQQADVMDKWNDRISRLVFWKTYFSQTCIECLKKQVVNGKSTLRT  
VPPSVSLLQKTPSSPVVTCCHATGFYPSGVMVFWQKDGQEQHEHGEILHNDGTFQKST  
HLRVTPEEWKNNKYQCVVQVTGIKEDFIKVLTESEIQTNWDPAPIIVPIIGVVVALLLV  
VVVGVVWIKKSKKGE

>Sasa-UMAs No prediction chr.14 NC\_027313:71.687.592-71.688.277  
HISQVM\*YGSEWDEETGITDVLVQYGHDRDFISFDLKTMTLVAPKHYPTQRCITFLKKY  
LQNGKSTLQRIVSILQKTPSSSVVTCCHATGFYPRGVMMWTRGEQDIYEDVKYGETLPNH  
VGTGFQMRSLTVDPKEWDNNNT

>Sasa-UGA XP\_013997204.1 chr.14 NC\_027313:59.499.424-59.507.750  
MKIYFVLLSCIHGALSVIHSLRYFYTSSSGISDFPEFVDMGMVNDQVISHYDSITKRKVP  
KQSWMGKVFDDQYWDSTEDLRGAEKVFKNNLQTAQKRFNQGGMHISQDMYGCEWDDDE  
GLTEGFHHIGYDGDQLLVFDLKRATWIASVPPQALHSMKWEGDPSSIESEKRYLTQDCIV  
WLKYLEYKTTLQRTVPPSVSLLQKTPSSPVVTCCHATGFYPSGVMVFWQKDGQDHHEDVE  
NGETLHNDGTFQKRTHLKVTSSEWKNNKYQCVVQVTGIKEDFIKVLTESEIQTNRGVNT  
IGSAPIIGVVVALLLVVVVVVGLVMWRKSKKGFVPASTSDTDSSENSGKGAQKI

>Sasa-UHA1 XP\_014021022.1 chr.21 NC\_027320:48.663.108-48.675.015  
MIVLNMYSVSNRIVHISTLLVTYLIPMTFAANHSLKYFYTALPQSTGLPEFSAVAYLDEE  
PMYFYDSSTKEVVARQEWVKGAVDPEFWRRNTHILKENEMVFKDNMDTARDRFNQTSALV  
LQKMYSCDWDTEVTGATDEREQYGYGGEDFLFDLKNRWIAPGRQGLITKMKWDANVIK  
EAKIHYLTHTCIEWLKKYVSNRRNLERLTVPPQVSLQKEPSNPVTCCHATGFYPNAIMIF  
WGRDVEIHADVVHEETLPGNDGTYQKRIHLTVSPEDLQQHNYTCTVQHVSGDDVVLSAN  
RDSIRSNRNTQAKTAEMEKPKKRHSADTLQIQLVRFIPVFV

>Sasa-UHA2ps no gene prediction chr.21 NC\_027320:48.690.859-48.692.163  
MGGQILVLWLCLSLRANSATHSLKYFYTALPQSTGLPEFSAVAYLDEEPMYFYDSSTKE  
VVARQEWVKEAVDPDFWRRNTHIFKETEKFVKYNMDSARDRFNQTSAALQKMYSCDWDD  
VTGAATDGREQYGYGGEDFLSFDLKNERWIAPGRQLITKMKWDANVIKAKIHYLHTHT  
CIEWLKKYVSNRRRNLRQRTVPPQVSLQKEPSNPVTCHATGFYPNAIMILWGRDGVIEHD  
DVVHEETLPNGDGTQYKRIHLTVSPEDLQQHNYTCTVQHIRGDDVVLNANRDSIRSNRN  
TQGHYITIVLVTLAFSVIVVFIMTKVCKGKEPTAGKEKQCPSEY

>Sasa-ULA XP\_014032820.1 chr.27 NC\_027326:10.049.215-10.051.213  
MKCFILLLLSISLHAASAAMHSLRYVYTATSGMPDFPEFMTVGLVNGEPISYYSIIRRE  
TPRQDWMKEAVDPDYWRNRTQTSIGDEQTFKANIDVAKQRFNQTGGVHVYQNMYGCEWDD  
EAGVTEGFDQYGYDGEDFLAFDLKTLKWIAPTQSLITKLNKWDNMAQIQQDKHYLTQTC  
IEWLKKYLDYDKSTLMRTVPPSVSLQKTPSSPVTCHATGFYPSGVMVSWQKDGQDHED  
VEYGETLQNDGTFQKSSHLTVTPEEWKNNKYQCVVQVTVGKEDFIKVLTESEIKTNWGN  
TNIGFVPANTSVDGNSSSHNTVPKE

>Eslu-UAA XP\_028978611.1 chr.10 NC\_025977:20.563.916-20.582.608  
MKVILSILGIGFLPTVSAVTHSLKYFYTGVSVDINFEFTTVGLVDNGQFIYFDSNTKT  
AVPKTEWMMKREGPDYWDSETQGTINLHQVFKNSIQSTMDRFNQSMSTGVHVVMYQMMYGCEW  
DDETEATEGFDQYGYDGEDFLLLDLKTLKWIAPKQAFITKNKFDNKTNLVLRKYFTQ  
TCVDWLKKYVDYKSSLMRTVPPVSLQKTPSSPVTCHATGFYPSRVNVTWKKNGQEQH  
EDVEMGEILPNDGTFQTSVRLNVKPEERKNNKYQCVVQVAGINEDFIKDLTEDTTSIGP  
IIGVVVAGLLVIAIVVIGVVIWKKKSKK

>Eslu-UBA XP\_012986805.1 chr.10 NC\_025977:20.351.381-20.369.310  
MYFFVLLILIIHGLHTVSAVTHSLKYFYTGVSVDINFEFTTVGLVDNVTFIYFDSNTKT  
AVPKTEWIKRVGPGYVWSQTKTCINLHQVFKNNIQVAKDRFNQSMSTGVHVLQWMYGCDW  
DDETGVIQGFQYGYDGENFISLDLKTLSWIAPKQAFITKNKWDSDKADNEYLKHYFTL  
ECIEWLKKYLQYEETSQMRTVPPSVSLQKTPSSPVTCHATGFYPSVENVILWQKDGPFQH  
EDVETGHTLPNGDGTQKSVLLTVKPEEWKNNKYQCVVQVSGINKDFIKDLTESEIQTNR  
DTSIGHIITVVVAGLLAIGAAVIGVNRKKKSKKASDDGNSNSNKSNSV

>Eslu-UCApt XP\_028978614.1 chr.10 NC\_025977:20.310.040-20.343.354  
MQIDYDSNTKKVVPKQDWMKAVGSDYWERQTONSIGAEQSFKANIDTAKQRFNQTGGV  
HVVQEMYGCEWDDETGVIQGFQYGYDGEDFISFDLKTLLKQVAPTPQAFISKNKLDYNEA  
GNEGEKHYLTQECIEWLKKYVDYKSSLMRTVPPSVSLQKTPSSPVTCHATGFYPSGVH  
VAWKKDGQDHEDVEMGETLQNDGTFQKSVLLTVKPEEWKNNKYQCVVQVSGINKDFIK  
DLTESEIQTNRPTSIGPIIGAVAGLLVIAVATVIGVVIWKKKSKKGFIPANTSDDGNS  
SNNTAPKA

>Eslu-UDA XP\_012986807.1 chr.10 NC\_025977:20.277.128-20.292.967  
MKVILLILGIGLLPTVSAASHSIRVYVYATSGIPDFPEFVNLGILDGMQIDYDSNTKK  
VVPKQDWMKAVGSDYWDRETQNSIGREKSFKANIDTAKQRFNQTGGVHVVAQMMFGCEWD  
DETVTRGFNQGFQDGEDFISFDLKTLLTWIAPKQAVITKNKWDNNDKAGNEYWKNYLTQE  
CIDVWKYVDYKSSLMRTVPPSVSLQKTPSSPVTCHATGFYPSGVHVTWKKDGQDHHE  
DVEMGETLQNDGTFQKSVRLNVKPEEWKNNKYQCVVQISGTEKDFIKDLTEDELVSNWG  
KTNRGVNDQTSIGPIIGVVVAGLLVIAAVIIGVVIWKKNRKGFVPANTSDDGSSNSAP  
EA

>Eslu-UEA XP\_028978617.1 chr.10 NC\_025977:20.168.704-20.174.982  
MKVFILLIMGIGLLHSVSAATHSLCYVYATSGIPDFPEFVTVGLVNREPISYYSIIRT  
ETPRQDWMANNEGSYDYESQTQISNGTEQTFKANIDILKQRFNQTGGVHVYQNMYGCEWD  
DETVTRGFNQGFQDGEDFIVFDLKRLLTWIAPKQAFINKNKWDNDRGWIEQTKNYLTQT  
CIEWLKKYVDYKSSLMRTVPPSVFLLQRTTPSSPVTCHATGFYPSRVMTWMMKDGQEQYE  
DVEVGETLQNDGTFQKSVHLTVKPEEWKNNKYQCVVQVSGIKEDFIKDLTEDQIQNTG  
FVPANTSDDGNSNSNTAPKA

>Eslu-UFA XP\_028978615.1 chr.10 NC\_025977:20.150.199-20.136.525  
MKVFILLIMGIGLLHSVSAATHSLCYVYATSGIPDFPEFVTVGLVNREPISYYSIIRT  
ETPRQDWMANNEGSYDYESQTQISNGTEQTFKANIDILKQRFNQTGGVHVYQNMYGCEWD  
DETVTRGFNQGFQDGEDFIVFDLKRLLTWIAPKQAFINKNKWDNDRGWIEQTKNYLTQT  
CIEWLKKYVDYKSSLMRTVPPSVFLLQRTTPSSPVTCHATGFYPSGVHVTWKKDGQEQHE  
DVEMGETLQNDDETFQRSALHTVKPEEWKNNKYQCVVQVAGIKEDFIKDLTEEEIKTNMD  
TTSIGPIIGVVVAGLLVIAAVIIGVVIWKKKSKKGFVPANTSDDGNSNSNTAPKA

>Eslu-UGApt XP\_034147214.1 NW\_022995044:9.751-21.223  
MQIDYDSNTKKVVPKQDWMKAVGSDYWDRETQNSIGREKSFKANIDTAKQRFNQTGGV  
HVAQMMFGCEWDDETGTVTRGFNQGFQDGEDFISFDLKTLLTWIAPKQAVITKNKWDNKA  
GNEYWKNYLTQECIDVWKYVDYKSSLMRTVPPSVSLQKTPSSPVTCHATGFYPRRVH  
VTWKKDGQDHEDVEMGETLQNDGTFQTSVHLNVKPEEWKNNKYQCVVQVSGIKEDFIK  
DLTEDELLSNWGTNRGVNDQTSIGPIIGVVVAGLLVIAAVIIGVVIWKKNRKGFVPAN  
TSDGSSNSNAPEA

**AF4.2 Deduced Z lineage amino acid sequences**

>Saal-ZBAa XP\_023831639.1 chr.31 NC\_036870:10.263.928-10.297.134  
MYRPNLMFLVLYFSLEICRSQSDIYSLXYIYTALSKPLELPGIHEFTAMGLMNNRQIDY  
YDSVSKKKIPKQEWREKLPADYWEKGTQSRKSKEQWFKVNVNII LMDRMRHNNTDVHILQ  
WKHGCEIEQQIDGTLNFIKGTQYSYDGDFFLAFDDATMOWVAPVDQALPTKRKWDGVQI  
LNQYTKGYLEKECVDWLSKFMFYEGKKHLRMDSDSPKVVYFAKKAKTAGHVRLTCMATGFY  
PKEVEMHIXKNGVPFTKHDGVQSTXXLPNDDDXQIRMSVQIPEADKETYECVSHRALK  
EPIVVKWDGKCCDCTQVTGVIIGAVVAVVLLLTGVSSLLVLWKRKGFIXGKKGALPPTGI  
QAPLNGNGNAAVLNMPVKKDDASSTSSDSGQGSNERLEREAMLANGGKTRDNPSPLD SG  
QGSSESSESGCQEGSPTGSREDIDENQQLLPGDGLYISTSLASIAFFRVWVI

>Saal-ZCAa XP\_023831647.1 chr.31 NC\_036870:10.307.087-10.314.615  
MYRPNLMFFVLYFSLEICRSQSDIYSLNYIYTALSKPLELTGIHEFTAMGLMNDKQIDY  
YDSVSKKKIPKQDWMREKLPADYWEKGTQSRKSKEQWFKVNVNII LMDRMRHNNTDLHILQ  
WKHGCEIDQSDGKVKFIKGTQYSYEGDDFLAFDDVTMOWVAPVDQALPTKRKWDGVQI  
LNQYTKGYLEKECVDWLSKFMFYEYKFEFSRADSPPKVYAFKKAKTAGHVRLTCMATGFY  
PRDVLMIHKKNGVPLTKHDGVQSTEALPNDDDTYQIRMSVQIPEADKETYECYVDHRTL  
EPIVVKWDGECDCSSFGAVVIGSVIAIIVVLLILSGVLFVLHKGRTIVIPGLRTTATGN  
EVEFSGVNTFENG

>Saal-ZBAb XP\_023830996.1 chr.30 NC\_036869:17.481.295-17.482.388 dual orf  
MYTFMLIVLYFATECIVSQSEIYSLNYIYTALSKPVELPGIHEFTAMGLMNDKQIDYYD  
SVDKKKIPKQDWMREKLPADYWEKGTQSRKSKEQWFKVNIINILMDRMXHNNTDVHVLQWK  
HGCEIDKQPDGTLKFIKGTQYSYDGDFFLAFDFATMOWVASVQAVPTKRKWDGVQILN  
QYTKGYLEKECVYWLKFMFYEGDKEFSSTDPNPNISVFAKKATPAGNVRLTCMATGFYPK  
DVI IHIKKNVQLTEDDGVQSDGVLPNDDDTYQIRISVQIPEADKEMYECVSHHTTLNES  
IVKWDGTCRDCSQSTVAXIAIIIVGAAAIGIIIVLFLWRK

>Saal-ZCAb XP\_023830996.1 chr.30 NC\_036869:17.402.402-17.403.594 dual orf  
KIYSLNYIYTALSKPVELPGIHEFTAMGLLNDKQIDYYDSVAKKKIPKQDWMREKLPADY  
WEKGTQSRKSKEQWFKVNVNII LMDRMRHNNTDVHILQWKHGCEIDKQPDGTLKFIKGTQ  
YSYDGDFFLAFDXATMOWVAPVDQALPTKRKWDGVQILNQYTKGYLEKECVDWLSKFMXY  
GXKEFXRXDSPKVVYAFKKAKTAGHVRLTCMATGFYPKDVLMIYIKKNGVQLTKQDGVQS  
DGVLPNDDETYQIRMSVQIPEADKETYECFVXHTTLKEPIVVKWDGKCCDCSQVTVVVIV  
AVVLLVLI VALVTSLLVLWKKGKICAGNTGALXPTEIQASLNGTVDTMSFSFL

>Onne-ZBAa XP\_029514088.1 chr.4 NC\_042538:45.904.746-45.954.046  
MYRPNLIFVLYFSLEICLSQSDIYSLNYIYTALSKPLELPGIHEFTAMGLMNDKQIDYY  
DSVAKKKIPKQDWMREKLPADYWDKGTQSRKSKEQWFKVNVNII LMDRMMHNNTDVHILQW  
KHGCEIDRQSDGTLKFIKGTQYSYDGDFFLAFDDANMOWVAPVDQALPTKRKWDGVQIL  
NQYTKGYLEKECVDWLSKFMKYEDKEFSRADSPPKVYVFAKKAKTAGHVRLTCMATGFY  
KDVEMHIIKKNVPLTERDGVQSTGVLPNDDDTYQIRMSVQIPEADKETYECYVDHRTLK  
PIVGKWDGICDCSSFGAVVIGAVIAIIVVLLILISVVLVFLHKS GTIVIPGLKTTATNG  
VAFSGVNTL

>Onne-ZCAa XP\_029514085.1 chr.4 NC\_042538:45.921.305-45.927.348  
MCAFKMYVVVLLFLFATLSTVDSVEKWSLNYIYTALSKPVELPGIHEFTAMGLMNDKQID  
YYDSVAKKKIPKQDWMREKLPADYWDKGTQSRKSKEQWFKVNVNII LMDRMRHNNTDVHIL  
QWKHGCEIDRQSDGTLKFIKGTQYSYDGDFFLAFDDANMOWVAPVVAQPTKRKWDGVQ  
ILNQYTKGYLEKECVDWLSKFMAYEDKEVSRADSPKVYAFKKAKTAGNVRLTCMATGFY  
PKDVEMHIIKKNVPLTERDGVQSTGILPNDDDTYQIRMSVQIPEADKGTYECSVNHVALK  
EPVVVKWDGKCCDCTQVTGVIIGAVVAVVLLLIVFSSMLVLWKKGKIFAGTKGDLPATGI  
QAPLNVTKDDASSTDSGQGSNESLEKRQCCQVEPLRSD

>Onne-ZDAa XP\_029514089.1 chr.4 NC\_042538:45.945.026-45.954.046  
MYRPNLMFFVLYFSLEICRSQSDIYSLNYIYTSLSKPLELPGIHEFTAMGLMNDKQIDY  
YDSVAKKKIPKQAWREKLPADYWDKGTQSRKSKEQWFKVNVNII LMKRMMHNNTDVHILQ  
WKHGCEIDQSDGTLKFIKGTQYSYDGDFFLAFDDANMOWVAAVVQAQPTKRKWDGVQI  
LNQYTKGYLEKECVDWLSKFMKYEDKEFSRADSSPRVYVFAKKAKTAGHVRLTCMATGFY  
PKDVIMQIKKNVPLTERDGVQSTGVLPNDDDTYQIRMSVQIPEADKETYECYVDHRTLK  
KPIVVKWDGECDCSSGTA VVIGAVIAI IIVVLLILI

>Onne-ZBAb XP\_029519275.1 chr.7 NC\_042541:17.154.314-17.164.103  
MYTFILFVFFYFSTECIFQSQSEIYSLNYIYTALSKPVELPGIHEFTAMGLMNNRQIDYYD  
SVDKKKIPKQDWMREKLPADYWEKGTQSRKSKEQWFKVNVNII LINRMRHNNTDVHILQWR  
HGCEIDKQPGGILKFIKGTQYSYDGDFFLAFDDATMOWVAPDDQALPTKRKWDGVQILN  
QYTKGYLEKECVDWLSKFMAYGDEKFSKADSPNIIYVFAKVKTAGNVRLTCMATGFYPK  
DVIINFKKNQIQLNKNDGVLSTGARPNDDDTYQIRISVQIPEADKQTYECFVNHITL NES



#### AF4. Deduced amino acid sequences

IVEKWDGTCRDCSQSTVAIIAIIIIIGGAAAIGIIIVLFLWKKGKICAGNTGALPPTGIQA  
 PLNGSG  
 >Onne-ZCAB XP\_029519273.1 chr.7 NC\_042541:17.135.412-17.150.806  
 MYFVVVLLFLGTLSTVNSETLSLSYIYTALSKPVELPGIHEFTAMGLMNNRQIDYYDSVD  
 KKKIPKQDWMREKLPADYWEKGTQSRKSKEQWFKVNVVDILMNRMRHNNTGVHILQWRHGC  
 EIDKQPDGTLKFIKGTQYSYDGDFFLAFDDATMQWVAPVDQALPTKRKWDGVQILNQYT  
 KGYLEKECVDWLSKFMAYGDKEANKHSPPKVYAFAKKAKIAGHIRLTCMATGFYPKDVLN  
 HIKKNGVQLTKQDGVQSDGVLNDEESYQIRMSVQIPEADKETYEFCVNHRTLKEPIVVK  
 WDGKCCDCSQGTVAIVAVVVAVVLLLAMVTLVLLVLRWRTGTICAGQTGALMPTGNQAPLN  
 VTKDVASSTSSDSGQGSNERLERETMLTNGVTEDASSTSSDSGQGSNERLERETMLTNGV  
 TTEDASSTSSDSAIGE  
 >Onki-ZBAb XP\_020355968.1 chr.14 NC\_034187:56.393.574-56.407.374  
 MYTFILFVVFYFSTECIFQSQSEIYSLNYIYTALSKPVELPGIHEFTAMGLMNNRLIDYYD  
 SVDKKIPKQDWMREKLPADYWEKGTQSRKSKEQWFKVNVVDILMNRMRHNNTDVHILQWR  
 HGCEIDKQPGGTLKFMKGTQYSYDGDFFLAFDDAAMQWVAPVDQALPTKRKWDDEVQILN  
 QYTKGYLEKECVDWLSKFMAYGDKEFSKADSPNIVFANKAKTAGDVRLTCMATGFYPK  
 DVKINFKKNGIQLNKNKNGVLTGARPNDDTYQIRISVQIPEADKQTYEFCVNHITLNE  
 IVEKWDGTCRDCSQSTVGI AIIIIIGGAAAIGIIIVLFRWKKGKICAGNTGALPPTGIQA  
 PLNVMTMNGARGTSADSGKDGGSINSSDSGKGSQKERSSDGASEEVEKTPMLPN  
 >Onki-ZCAB XP\_020355967.1 chr.14 NC\_034187:56.408.644-56.418.129  
 MYFVVVLLFLGTLSTVNSETLSLNYIYTALSKPVELPGIHEFTAMGLMNNRQIDYYDSVD  
 KKKIPKQDWMREKLPADYWEKGTQSRKSKEQWFKVNVVDILMNRMRHNKTGVHILQWRHGC  
 EIDKQPDGTLKFIKGTQYSYDGDFFLAFDDATMQWVAPVDQALPTKRKWDGVQILNQYT  
 KGYLEKECVDWLSKFMAYEDKEANKHSPPKVYAFAKKAKTAGHIRLTCMATGFYPKDVI  
 HIKKNGVQLTKQDGVQSDGVLNDEESYQIRMSVQIPEADKETYEFCVNHRTLKEPIVAK  
 WDGKCCDCSQGTVVIVAVVAVVLLLAVVTSLLVLRIGTICGGQTGALMPTGNQAPLNV  
 TTEDASSTSSDSGQGSNERLERETMLTNGVTTEDASSTSSDSGQGSN  
 >Onki-ZBAa\_pt XP\_031649466.1 chr.17 NC\_034190.2:33.300.332-33.308.914  
 MGLMNDKQIDYYDSVAKKKIPKQAWMREKLPADYWDKGTQSRKSKEQWFKVNVVDILMKRM  
 RHNNTDVHILQWRHGCIDRQSDGTLKFIKGTQYSYDGDFFLAFDDANMQWVAPVQVQA  
 PTKRWDGVQILNQYTKGYLEKECVDWLSKFMNYEDKEFSRADSPPRVYVFAKKAKTAGH  
 VRLICMATGFYPKDVIQMKKNGVPLTERDGVQSTGVLNDDDTYQIRMSVQIPEADKET  
 YECSVDHRTLKAPIVGKWDGICDCSSFGAVVIGAVIAIIVVLILVSVVLFVHLKSGTIV  
 IPGLKTTDQGSQNAESSDRGSEEDVKKSMPLQENDRFWPNFLTGP  
 >Onki-ZCAa XP\_031649459.1 chr.17 NC\_034190.2:33.287.633-33.293.654  
 MCAFMYVVVLLFIFATLSTVDSVGKWSLNYIYTALSKPVELPGVHEFTAMGLMNDKQID  
 YYDSVSKKKIPKQDWMREKLPADYWDKGTQSRKSKEQWFKVNIINILDRMRHNNTDVHIL  
 QWKHGCEIDQSDGTLKFIKGTQYSYDGDFFLAFDDANMQWVAPVQVQAQPTKRKWDGVQ  
 ILNQYTKGYLEKECVDWLSKFMAYEDKEVSRADPPKVYAFAKKAKTVGNVRLTCMATGFY  
 PKDVEMHIKKNVPLTERDGVQSTGVLNDDDTYQIRMSVQIPEADKETYECSVDHVALK  
 KPVVVWWDGKCCDCTQVTGVIIGAVVVLVLLLVVSSMLVWLKKGKIFAGKKGDLPATGI  
 QAPLNGNNGAAVLNMFGKRDDASSTDSGQGSNESLEKEAILPNGAIEE  
 >Onki-ZDAa XP\_020361083.2 chr.17 NC\_034190.2:33.261.064-33.268.451  
 MYRPNLMFFVLYFSLCICRSQSDIYSLNYIYTSLSKPLELPGIHEFTAMGLMNNQIDY  
 YDSVAKKKIPKQAWMREKLPADYWDKGTQSRKSKEQWFKVNVVDILMKRMMHNSTDVHILQ  
 WKHGCEIDQSDGTLKFIKGTQYSYDGDFFLAFDDANMQWVAPVQVQAQPTKRKWDGVQI  
 LNQYTKSYLEKECVDWLSKFMKYEDKEFSRADSPPRVYAFAKKAKTAGHVRLTCMATGFY  
 PKDVIQIKKNGVPLTEHGVQSTGVLNDDDTYQIRMSVQIPEADKETYEFCVNHRTLK  
 PIVVWWDGECDCSSGTAVVIGAVIAIIVVLILVSVVLFVHLKRETIVIPGLKTTATNG  
 VAFSGVNTLEYGG  
 >OntS-ZBAa XP\_024297365.1 chr.13 NC\_037109:25.649.700-25.659.903  
 MYRPNLMFFVLYFSLCICLSQSDIYSLNYIYTALSKPLELPGIHEFTAMGLMNDKQIDY  
 YDSVAKKKIPKQAWMREKLPADYWDKGTQSRKSKEQWFKVNVVDILMKRMRHNNTDVHILQ  
 WKHGCEIDQSDGTLKFIKGTQYSYDGDFFLAFDDANMQWVAPVQVQAQPTKRKWDGVQI  
 LNQYTKGYLEKECVDWLSKFMKYEDKEFNRADSPPRVYEFAKKAKTAGHVRLTCMATGFY  
 PKDVIQIKKNGVPLTERDGVHSTGVLNDDDTYQIRMSVQIPEADKETYEFCVVDHRTLK  
 KPIVVWWDGECDCSSGTAVVIGAVIAIIVVLILISVVLVFLVHLKSGTIVIPGLKTTAKYD  
 ESRTSSDSQGSQNAAGSSGRGSEEDVKKSMPLQESV  
 >OntS-ZCAa XP\_024297360.1 chr.13 NC\_037109:25.633.867-25.641.623  
 MCAFMSVFLVLLFLFATLSTVDSVGKWSLNYIYTALSKPVELPGIHEFTAMGLMNDKQID  
 YYDSVSKKKIPKQDWMREKLPADYWDKGTQSRKSKEQWFKVNVNINILDRMRHNNTDVHIL  
 QWTHGCEIDQSDGTLKFIKGTQYSYDGEDFLAFDDANMQWVAPVQVQAQPTKRKWDGVQ  
 ILNQYTKGYLEKECVDWLSKFMAYEDKEVSRADSPKVYAFAKKAKTAGNVRLTCMATGFY

## AF4. Deduced amino acid sequences

PKDVMQMKKNGVPLTERDGVQSTGVLPNDATYQIRMSVQIPEADKETYECVSNHVALK  
 EPVVVKWDGKCCDCTRVTVGVIIRAVVVVLLLVVPCCSMLVLWKKGKIIFAGKKGDLPAT  
 GIQAPLNGNGAAVNLNMPGTRMTLAAALTLAASN  
 >Onts-ZDAa XP\_024297354.1 chr.13 NC\_037109:25.712.62-25.77467  
 MYRPNLMFFVLYFSLEICRSQSDIYSLNYIYTSLSKPLELPGIHEFTAMGLMNNQQIDY  
 YDSVAKKKIPKQAWMREKLPADYWDKGTQSRKSKEQWFKVNVVDILMKRMMHNSTDVHILQ  
 WKHGCEIDQQSDGTLKFIKGTDQYSYDGDFFLAFDDANMQWVAPVQAPTKRQWVQVQI  
 LNQYTKGYLEKECVDWLSKFMKYEDKEFSRADSPPRVYEFKAKKTAGHVRLTCMATGFY  
 PKDVMQIKKNGVPLTERDGVQSTGVLPNDDDTYQIRMSVQIPEADKETYECYVDHRTLK  
 KPIVVKWDGECDCSSGTAUVVIGAVIAIIVVLILISVVLVFLHKSQIVFPGLKTTATGN  
 GVAFSGVNTLEYANLISPLL  
 >Onts-Z1\_pt XP\_024256643.1 NW\_020128813:6.533.170-6.542.805  
 MGLMNNRQIDYDSDVKKKIPKQDWMREKLPADYWEKGTQSRKSKEQWFKVNVVDILMNR  
 RHNNTDVHILQWRHGCEIDKQPGGTLKFMKGTQYSYDGDFFLAFDDATMQWVAPVDQAL  
 QTKRQWDEVQILNQYTKGYLEKECVDWLSRFMEYGDKEFSKADSPNIYVFANKAKTAGN  
 VCLTCMATGFYPKDVIINFKTNGIQLNKNQDGLVSTGARPNNDDTYQIKISVQIPEADKQT  
 YECFVNHRTLNESIVEKWDGTCRDCSQSTVGI I A I I I I G G A A A I G I I I V L F R W K E G K I C A  
 GNTGALPPTGIQAPLNGSGIGATNSNLTTTPMTMNGARGTSSDSGKDGGSINSSDSGKGS  
 QKEGLQMEPVRRKLRHRCCLEIVA  
 >Onts-Z2 XP\_024256647.1 NW\_020128813:6.544.708-6.554.336  
 MYFVVVLLLFGLTSLVNSSETLSLNYIYTALSKEVLPGLIHEFTAMGLMNNRQIDYDSDV  
 KKKIPKQDWMREKLPADYWEKGTQSRKSKEQWFKVNVVDILMNRMRHNNTGVHILQWRHGC  
 EIDKQPDGTLKFIKGTQYSYDGDFFLAFDDATMQWVAPVDQALPTKRQWVQVQIILNQY  
 KGYLEKECVDWLSKFMKYEDKEANKHSPPKVYAFKAKKTAGHIRLTCMATGFYPKDVM  
 HIKKNGVQLTKQDGVQSDGVLNDEESYQIRMSVQIPEADKETYECFVNHRTLKEPIVVK  
 WDGKCCDCSQVTVVVIIVAVVAVVLLAVVTSLLVLRWRIGHTICAGQTGALMPTGNQAPLNV  
 TKDGASSTSSDSGQSSNECLEREMLTNGVTTEDASSTSSDSGQGSNERLESVMLTNEA  
 TGE  
 >Onts-ZBAb\_pt XP\_024251602.1 chr.31 NC\_037127:26.757.171-26.766.798  
 MGLMNNRQIDYDSDVKKKIPKQDWMREKLPADYWEKGTQSRKSKEQWFKVNVVDILMNR  
 RHNNTDVHILQWRHGCEIDKQPGGTLKFMKGTQYSYDGDFFLAFDDATMQWVAPVDQAL  
 QTKRQWDEVQILNQYTKGYLEKECVDWLSRFMEYGDKEFSKADSPNIYVFANKAKTAGN  
 VCLTCMATGFYPKDVIINFKTNGIQLNKNQDGLVSTGARPNNDDTYQIKISVQIPEADKQT  
 YECFVNHRTLNESIVEKWDGTCRDCSQSTVGI I A I I I I G G A A A I G I I I V L F R W K E G K I C A  
 GNTGALPPTGIQAPLNGSGIGATNSNLTTTPMTMNGARGTSSDSGKDGGSINSSDSGKGS  
 QKEGLQMEPVRRKLRHRCCLEIVAR  
 >Onts-ZCAB Z XP\_024251600.1 chr.31 NC\_037127:26.745.632-26.755.261  
 MYFVVVLLLFGLTSLVNSSETLSLNYIYTALSKEVLPGLIHEFTAMGLMNNRQIDYDSDV  
 KKKIPKQDWMREKLPADYWEKGTQSRKSKEQWFKVNVVDILMNRMRHNNTGVHILQWRHGC  
 EIDKQPDGTLKFIKGTQYSYDGDFFLAFDDATMQWVAPVDQALPTKRQWVQVQIILNQY  
 KGYLEKECVDWLSKFMKYEDKEANKHSPPKVYAFKAKKTAGHIRLTCMATGFYPKDVM  
 HIKKNGVQLTKQDGVQSDGVLNDEESYQIRMSVQIPEADKETYECFVNHRTLKEPIVVK  
 WDGKCCDCSQVTVVVIIVAVVAVVLLAVVTSLLVLRWRIGHTICAGQTGALMPTGNQAPLNV  
 TKDGASSTSSDSGQSSNECLEREMLTNGVTTEDASSTSSDSGQGSNERLESVMLTNEA  
 TGE  
 >Onmy-ZBAb XP\_021416205.1 chr.18 NC\_035090:28.089.685-28.101.281  
 MYTFILFVLYLSTECIVQSQSVIYSLNYIYTALSKEVLPGLIHEFTAMGLMNNRQIDYD  
 SVDKIKIPKQDWMRDKLPADYWEKGTQSRKSKEQWFKVNVVDILMNRMRHNNTDVHILQWR  
 HGCEIDKQPDGTLKFIKGTQYSYDGDFFLAFDDANMQWVAPVDQALPTKRQWDRVQILN  
 QYTKGYLEKECVDWLSKFMKYEDKEFSKADSPNIYVFANKAKTAGNVRRLTCMATGFYPK  
 DVIINFKNGIQLNKNQDGLVSTGARPNNDDTYQIRMSVQIPEADKQTYECFVNHITLNE  
 IMEKWDGTCRDCSQSTDAI I A I I I G G A A A I G I I I V L F R  
 >Onmy-ZCAB XP\_021416204.1 chr.18 NC\_035090:28.076.769-28.087.832  
 MYFVVVLLLFGLTSLVNSSETLSLNYIYTALSKEVLPGLIHEFTAMGLMNNRQIDYDSDV  
 KKKIPKQDWMRDKLPADYWEKGTQSRKSKEQWFKVNVVDILMNRMRHNNTGVHILQWRHGC  
 EIDKQPDGTLKFIKGTQYSYDGDFFLAFDDATMQWVAPVDQALPTKRQWVQVQIILNQY  
 KGYLEKECVDWLSKFMKYEDKEANKHSPPKVYAFKAKK I A G H I R L T C M A T G F Y P K D V L M  
 HIKKNGVQLTKQDGVHSDGVLNDEESYQIRMSVQIPEADKETYECFVNHRTLKDPVVK  
 WDGKCCDCSQGTVVVIIVAVVAVVLLALVTSLILWRRIGHTICAGQTGALKPTGNQAPLNV  
 TKDGASSTSSDSGQGSIERLERETMLTNGVTKDGASSTSSDSGQGSNERLESEVMLTNEA  
 TGE  
 >Onmy-ZDAb-ps No prediction chr.14 NC\_035090.1:28.075.382-28.075.939  
 VHLLMWKHGCKIDQQSDGTLKFIYGTQYSYDGDFFLAFDDATMQWVAPVDQALPTKRQW

#### AF4. Deduced amino acid sequences

DGVQILNQYTKGYLEKECVDWVSKFMAYGGKVFSTRADKKSQTAGHVRLT\*MATGFYPKE  
 >Onmy-ZBAa XP\_021427706.1 chr.18 NC\_035094:33.630.377-33.638.372 two genes  
 MYRSNFMFFVLYFSLEICICLSQSDIYSLNYIYTALSKPLELPGIHEFTAMGLMNDKQIDY  
 YDSVAKKKIPKQDWMREKLPADYWDKGTQSRKSKEQWFKVNVNIDILMKRMRHNNTDVHILQ  
 WKHGCEVDQSDGTFKFIKGTQYSYDGDFFLAFDDANMQWVAPVQQAQPTKRKWDGVQI  
 LNQYTKGYLEKECVDWLSKFMAYEDKEFSRADSPPRVYVFAKKAKTAGHVRLTCMATGFY  
 PKDVEMHIKKNVPLTERDGVQSTGVLPNDDDTYQIRMSVQIPEADKETYEYCYVDHRTLK  
 KPIVKGWDGICCDCRSFGAVVIGAVIAIIVVLILISVVLVFLVHHRGTIVIPGLRTRATDD  
 ESRTSSDSDQGSQAGSSSERGSEEDVKSMLPQGMEKWS  
 >Onmy-ZCAa XP\_021427706.1 chr.18 NC\_035094:33.647.289-33.649.964 two genes  
 LNYIYTALSKPVELPGIHEFTAMGLMNDKQIDYYSVSKKKIPKQDWMREKLPADYWDK  
 TQSRKSKEQWFKVNIINILMDRMRHNNTDVHILQWKHGCEIDRQSDGTFKFIKGTQYSYD  
 GDDFLAFDDANMQWVAPVQQAQPTKRKWDGVQILNQYTKGYLEKECVDWLSKFMAYGGKE  
 VSRASPPRVYAFAKKAKTAGHVRLTCMATGFYPKYVIMQMKNVPLTKRDGVQSTGVLP  
 NDDDTYQIRMSVQIPEADKETYECSVNHVALKEPVVVKWDGKCCDCTQVTGVIIGAVVVL  
 VLLLTAVSSMLVLWKKGKIFAGKKGDLPATGIQAPLNGNGNGTAVLNMPGQGSNKSLERE  
 AMLANGGTDKGDASSTDSGQGSNERLEREAMLANGVIKDGASSTDSGQGSNASLEERC  
 >Onmy-ZDAa XP\_021427698.1 chr.18 NC\_035094:33.686.393-33.693.710  
 MVVDRPSLQAAGVSFHHQDQEIYSLNYIYTSLSKPLELPGIHEFTAMGLMNNQIDYYS  
 VAKKKIPKQAWMREKLPADYWDKGTQSRKSKEQWFKVNVNIDILMKRMMHNSTDVHILQWK  
 GCEIDRQSDGTLKFIKGTQYSYDGDFFLAFDDANMQWVAPVQQAQPTKRKWDGVQILNQ  
 YTKGYLEKECVDWLSKFMAYEAKESRADSPPRVYAFAKKAKTAGHVRLTCMATGFYPKD  
 VIMQIKKNVPLTERDGVQSTGVLPNDDDTYQIRMSVQIPEADKETYEYCYVDHRTLKPKI  
 VVKWDGECDCRSFGAVVIGAVIAIIVVLILVSVVLVFLVHHRGTIVIPGLRTRATGNGVA  
 FSGVNTLEYGG  
 >Satr-ZAAa XP\_029587655.1 chr.34 NC\_042990:10.854.743-10.873.281  
 MNISHLTVFVLCFSLEICICQSDTYSLYIYTALSKPVDLPGIHEFTAMGLMNNKQIDYD  
 SVSKKKIPKQDWIREKLPADYWEKGTQSRKSKEQWFKVNVNIDILMKRMRHNNTDVHVLQWK  
 VGCEIDQSDGTLKFIKGTQYSYDGDFFLAFDDVMTQWVAPVDQALPTKRKWDGVQILN  
 QYTKGYLEKECVDWLSKFMAYEAKESRADSPPRVYAFAKKAKTAGHVRLTCMATGFYPK  
 DVVMHIKKECVLLTKHDGVQAGVLPNDDDTYQIRMSVQIPEADKETYEYCYVHHRALKEP  
 IVVKWDGKCCDCSSVAVVIGAVVIAFIVVLILVSVVLVFLVHRRGTIGIPGLRTRANGGAA  
 VMV  
 >Satr-ZBAa XP\_029587649.1 chr.34 NC\_042990:10.993.167-11.002.989  
 MYRPNLMFFVLYFSLEICICRSQSDIYSLNYIYTALSKPVELPGIHEFTAMGLMNNKQIDY  
 YDSVSKKKIPKQDWMREKLPADYWEKGTQSRKSKEQWFKVNVNIDILMERMRHNNTDLHILQ  
 WKHGCEIDQQSDGTLKFIKGTQYSYDGDFFLAFDDVMTQWVAPVDQALPTKRKWDGVQI  
 LNQYTKGYLEKECVDWLSKFMAYEYEDKEFSRADSAPKVYAFAKKAKTAGHVRLTCMATGFY  
 PKDVVMRIKKNVPLTEHDGVQAGVLPNDDDTYQIRMSVQIPEADKETYEYCVNHRPLE  
 EPIVVKWDGTCDCSSVAVVIGAVVIAFIVVLILVSVVLVFLVHRRGTIVINGLRTRAKD  
 DESRTSSDSGKASQNTGSSDRGSEEDVKKSMPLKGS  
 >Satr-ZCAa XP\_029587646.1 chr.34 NC\_042990:11.010.935-11.018.246  
 MCAFMYVVVLLFLFATLSTVDSVERWSLNYIYTALSKPVELPGIHEFTAMGLMNNQID  
 YYDSVAKKKIPKQDWMREKLPADYWEKGTQSRKSKEQWFKVNVNIDILMDRMRHNNTDLHIL  
 QWKHGCEIEQRDGTDLKFIKGTQYSYDGDFFLAFDDVMTQWVAPVDQALPTKRKWDGVQI  
 LNQYTKGYLEKECVDWLSKFMAYEYEGEKHLRMDSPPKVYAFAKKAKTAGHVRLTCMATGFY  
 PKDVVMRIKKNVPLTEHDGVQAGVLPNDDDTYQIRMSVQIPEADKETYEYCVNHRALK  
 EPIVEKWDGKCCDCNQTGVIIGAVVAVVLLFITSLVLLVWKKGKIFAGKKGAPPPTGIQE  
 PLNNGNGFGAAVNLMPVKDDASSTDSGQGSNERLETEPMLANGVKKDDASSTDSGQGSNE  
 RLETEPMLTNGVKKDDASSTDSSEPLGS  
 >Satr-ZDAa XP\_029587654.1 chr.34 NC\_042990:11.044.071-11.050.979  
 MYRPNLMFFVLYFSLEICICRSQSDIYSLNYIYTALSKPVDLPGIHEFTAMGLMNNQIDY  
 YDSVSKKKIPKQDWMREKLPADYWEKGTQSRKSKEQWFKVNVNIDILMERMRHNNTDVHILQ  
 WKHGCEIDQSDGTLKFIKGTQYSYDGDFFLAFDDATMQWVAPVDQALPTKRKWDGVQI  
 LNQYTKGYLEKECVDWLSKFMAYEYEGEKFSRADSAPKVYAFAKKAKTAGHVRLTCMATGFY  
 PKDVEMRIKKNVPLTEHDGVQAGVLPNDDDTYQIRMSVQIPEADKETYEYCVHHRRTLK  
 GPIVVKWDGICCDSSGAVVIGAVIIIVVLILVSVVLVFLVHRRGTIVIPGLRRTAIGN  
 GVAFSGVNTS  
 >Satr-ZBAb XP\_029591369.1 chr.36 NC\_042992.1:32.133.017-32.147.191  
 MYTFMLFVLYLSTECIVQSQSEIYSLNYIYTALSKPVELPGIHEFTAMGLMNNRQIDYD  
 SVDKKKIPKQDWMREKLPADYWEKGTQSRKSKEQWFKVNVNIDILMERMRHNNTGVRILQWK  
 HGCEVDKQPDGTLKFIKGTQYSYDGDFFLAFDDVMTQWVAPVDQALPTKRKWDGVQILN  
 QYTKGYLEKECVDWLSKFMAYEYEGEHFSSADSPPIINVFANKAKTAGNVHLTCMATGFYPK

## AF4. Deduced amino acid sequences

DV I I H F K K N G V Q L T E D D G V L S T G A R P N N D D T Y Q I R I S V Q I P E A D K Q T Y E C F V N H I T L K E Q  
 I V V K W D G T C R D F S Q S T V P I I A I I I I G G S V A I G I I I L L F L W K K G K I C A G N T G A P P P T G I Q A  
 S L I G N G N G A T N L I L T T P M T T D G A S S T S S D S G Q S N E H P E R E A M L T N G V G E D G G S S N S S D  
 S G K G S Q K E R S S D G A S E E E V K T P M L P N

>Satr-ZCAB XP\_029591372.1 chr.36 NC\_042992.1:32.120.133-32.131.498  
 M Y F V V V L L L F G T L S T V N S E I H S L N Y I Y T A L S K P V E L P G I H E F T A M G L M N D K Q I D Y Y D S V  
 D K K K I P K Q D W M R E K L P A D Y W E K G T Q S R K S K E Q W F K V N V N I L M E R M R H N D T G V H I L Q W R H G  
 C E V D T Q P D G T L K F I K G T D Q Y S Y D G D D F L A F D D V T M Q W V A P V D Q A L P T K R K W D G V Q I L N Q Y  
 T K G Y L E K E C V D W L S K F M A Y G D K E L I R A D S P P K V Y A F A K K A K T A G H I R L T C M A T G F Y P K D V  
 L M H I K K N G V Q L T K Q D G V L S D G V L P N D D K T Y Q I R M S V Q I P E A D K E T Y E C Y V S H R M L K E P I E  
 V K W D G K C C D C S Q V T V V V I V A V V V V L L L A L V T S L L V L R K K G K I C A G N T G A L P P T E I Q A P L  
 N G N G N G A A I L S M P V T M D S A S S T S S D S G Q S N E R L E R E A M L T N E A I G E

>Satr-ZDAbpt XP\_029591820.1 chr.36 NC\_042992.1:32.117.738-32.119.137  
 M L W A L T N N S Y D G D D F L A F D D A T M Q W V A P V D Q A L P T K W K W D R V Q I L N Q Y T K G Y L E K E C V D W  
 V S K F M V Y G D K E F S P P K I Y V F A N K A K T A G N V H L T C M A T G F Y P K D V I I H I K K N G V H L T D K D G  
 V Q S S V V I P N D D D A Y Q I R K S V E I Q E A D T S N Y K C Y V L H G T L L K P I V G K W G K V F

>Sasa-ZAAa XP\_014032772.1 chr.27 NC\_027326:10.464.841-10.482.971  
 M N I S H L T V F V L Y F L E C I C R S D T Y S L S Y I Y T A L S K P V D L P G I H E F T A M G L M N N Q Q I D Y Y D  
 S V S K K K I P K Q D W M R E K L P A D Y W E K G T Q S R K S K E Q W F K V N V D I L M K R M R H N N T D V H V L Q W K  
 V G C E I D Q Q S D G T L K F I K G I D Q Y S Y D G D D F L A F D D V T M Q W V A P V D Q A L P T K R K L D D V Q I L N  
 T Y T K G Y L E K E C V D W L S K F M E Y E D K E F S W A D S A P K V Y A F A K K A K T A G H V R L T C M A T G F Y P K  
 D V V M H I K K N G V P L T D R D G V Q S A G L L P N D D E T Y Q I R M S V Q I P E A D K E T Y E C Y V H H R T L E E P  
 I V V K W D G K C C D C S S G G A V V I G A V V I T F I V V L I L V L G L F V L H R R G T I V I P G L R T R A N G N G A A  
 A M V

>Sasa-ZBAa XP\_014032768.1 chr.27 NC\_027326:10.602.279-10.612.437  
 M Y R P N L M F F V L Y F S L E C I C R S Q S D I Y S L N Y I Y T A L S K P V D L P G I H E F N A M G L M N N K Q I D Y  
 Y D S V S K K K I P K Q N W M R E K L P A D Y W E K G T Q S R K S K E Q W F K V N V N I L M D R M R H N N T N V H I L Q  
 W K H G C E I D Q Q R D G T V K F I K G I D Q Y S Y D G D D F L A F D D V T M Q W V A P V D Q A L P T K R K W D G V Q I  
 L N Q Y T K G Y L E K E C V D W L S K F M E Y G D K E F S R A D S A P K V Y A F A K K A K T A G H V R L T C M A T G F Y  
 P K D V E M N I K K N G V P L T K H D G V Q S A G V L P N D D E T Y Q I R M S V Q I P E A D K E T Y E C Y V H H R T L E  
 E P I V I K W D G K C C D C S S F N A V V I G A V V I T F I V V L I L V L F V L H R R G T I V I H G L R T R A K D D E  
 S R T S S D S G K G S Q N A G S S D S G S G E D V K K S M L P K G S V

>Sasa-ZCAa XP\_014032767.1 chr.27 NC\_027326:10.620.148-10.627.552  
 M S A F K M Y V V A L L L L F A T L S T E D T V E T W S L N Y I Y T A L S K P V E L P G I H E F T A M G L M N D K Q I D  
 Y Y D S V A K K K I P K Q D W M R E K L P A D Y W E K G T Q S R K S K E Q W F K V N V N I L M D R M R H N N T D V H I L  
 Q W K H G C E I N Q Q S D G T L K F I K G T D Q Y S Y D G D D F L A F D D V T M Q W V A P V D Q A L P T K R K W D G V Q  
 I L N Q Y T K G Y L E K E C V D W L S T F M E Y G K K H L R M D D S A P K V Y A F A K K A K T A G H V R L T C M A T G F  
 Y P K D V M H I K K N G V P L T K H D G V Q S A G V L P N D D E S Y Q I R M S V Q I P E A D K E T Y E C Y V Y H R T L  
 E E P I V E K W D G K F Y D C N Q V T G V I I G V V A V V L L F I V V T P L L V L W K K G K I F A G K K G A P P P T G I  
 Q E P L N V K K D D A S T D S G Q S N E Y L E T E P M M T T G A V G E

>Sasa-ZDAa XP\_014032770.1 chr.27 NC\_027326:10.648.408-10.655.356  
 M Y R P N L M F F V L F F F L E C I C R S Q S H I Y S L N Y I Y T A L S K P V D L P G I H E F T A M G L M N N Q Q I D Y  
 Y D S V S K K K I P K Q D W M R E K L P A D Y W E K G T Q S R K S K E Q W F K V N V N I L M D R M R H N N T D V H I L Q  
 W K H G C E I D Q Q S D G T L K F I K G T D Q Y S Y D G D D F L A F D D V T M Q W V A P V D Q A L P T K R K W D G V Q I  
 L N Q Y T K G Y L E K E C V D W L S K F M E Y G E K E F S R P D S A P K V Y A F A K K A K T A G H V R L T C M A T G F Y  
 P K D V M H I K K N G V P L T D R D G V Q S A G V L P N D D E T Y Q I R M S V Q I P E A D K E T Y E C Y V H H R T L E  
 K P I V I K W D G I C C D C S S F N A V V I G A V V I T F I V V L I L V V L F V L H R R G T I V I P G L R T T A T G N G  
 V A F S G V N T S

>Sasa-ZBAb XP\_013997187.1 chr.14 NC\_027313:59.698.589-59.724.523  
 M Y T F M L F V F Y F S T E C I V Q S Q S E I Y S L N Y I Y T A L S K P V E L P G I H E F T A M G L M N D I Q I D Y Y D  
 S V D K K K I P K Q D W M R E K L P A D Y W E K G T Q S R K R K E Q W F K V N V N I L M E R M R H N N T D V H V L Q W R  
 H G C E V D K Q P D G T L K F M K G I D Q Y S Y D G D D F L A F D D V T M Q W V A P V D Q A L P T K R K W D G V Q I L N  
 Q Y T K G Y L E K E C V D W L S K F M E Y G E K H F S S T D S P P N I Y V F T K K A K P A G N V H L T C M V T G F Y P K  
 D V I I H F K K N G V Q L T E D D G V L S T G A R P N N D D T Y Q I R I S V Q I P E A D K D M Y E C S V S H A M L K E P  
 I V E K W G A N T G A P P P T G I Q A S L I G N G N G A T N L N L T T P I G E D G G S S N S S D S G K G S Q K E R S  
 S D G A S E E E V K T P M L L N

>Sasa-ZCAB XP\_013997181.1 chr.14 NC\_027313:59.735.522-59.758.314  
 M Y T F M L F V F Y F S T E C I V Q S Q S E I Y S L N Y I Y T A L S K P V E L P G I H E F T A M G L M N N R Q I D Y Y D  
 S V D K K K I P K Q D W M R D K L P A D Y W E K G T Q S R K S K E Q W F K V N V N I L M E R M R H N N T G V R I L Q W K  
 H G C E V D K Q P D G T L K F I K G T D Q Y S Y D G D D F L A F D D V T M Q W V A P V D Q A L P T K R K W D G V Q I L N  
 Q Y T K G Y L E K E C V D W L S K F M E Y G E K H F S S A D S P P D I N V F A N K A K T A G N V H L T C M A T G F Y P K  
 D V I I H F K K N G V Q L T E D D G V L S T G A R P N N D D T Y Q I R I S V Q I P E A D K Q T Y E C S V S H I T L V Q P  
 I V V K W D G T C R D F S Q S T V P I I A I I I I G G S V A I G I I I V L F L S K K G K I C A G N T G A P P P T G I Q A

SLIGNGNGATNLNMIYTPSNGNGATNYNMIHTPSNGNGATNYNMIHTPSNGNGATNCNMI  
 >Sasa-ZDAb XP\_013997179.1 chr.14 NC\_027313:59.767.933-59.779.225  
 MYFVVVLLLLFGTSLTVNSEIHSNLNYITALSKEPVELPGIHEFTAMGLMNDKQIDYDSDV  
 KKKIKPKQDWMREKLPADYWEKGTQSRKSKEQWFKVNVNILMERMRHNNTDVHILQWRHGC  
 EVDTQPDGTLKFMKGTQDQYSYDGDFFLAFDDVTMQWVAVPDQALPTKRKWDGVQILNQYT  
 KGYLEKEKCVDWLSKFMAYRDKFIRADSPPKVYAFAKKAKTAGHIRLTCMATGFYPKDVL  
 MHIKKNGVQLTKQDGVQSDGVLPNDDSYQIRMSVQIPEADKETYECYVSHRTLKEPIEV  
 KWDGKCCDCSQVTVVIVAVVVVLLLALVTSLLVLRKKGKICAGNTGALSPTETIQAPLN  
 GNGNGAAILSMPVTMSA  
 >Eslu-ZAA XP\_010898810.3 chr.10 NC\_025977:19.692.986-19.710.404  
 MINNMNKFSLFFVATGYIVPSQCEIYSLNYIYTALSKEPVELPGIHEFTAMGLMNDKQID  
 YYDSDIKQKIPRQDWMKEKLPDPDYWEKGTQSRKSKEQWFKVNVNILMERMKHNKTDVHIL  
 QWKHGCEVDKQSDGTLKFIKGTQDQYSYDGDFFLAFDDVTSQWVAVPDQALPTKRKWDGVQ  
 ILNQYTKGYLEKEKCVDWLSKFMFSYEHTEFSSTDAPPKVFVAFKAKTEGHVRLTCMATGF  
 YPKDQVQIMKNGVPLTEHDGVYSEGVLPNDDTYQIRKSVQIPEADTNDYEVCHVDHRTL  
 TEPFVKKWDGICCCDGINIGAIIGPAVGVVFPFLFLILFVVLWKIHIHGRLPWAVPQNVY  
 GNEMTNTPGDSDGDGVN  
 >Eslu-ZBA XP\_028978590.1 chr.10 NC\_025977:19.050.846-19.111.940  
 MVNNMYMFSYFLVATGYIFQSQCEIYSLNYIYTALSKEPVELPGIHEFTAMGLMNDKQID  
 YYDSQVQKIPRQDWMKEKLPDPDYWEKGTQSRKSKEQWFKVNVNILMERMKHNNTDVHIL  
 QWKHGCEVDKQSDGTLKFIKGTQDQYSYDGDFFLAFDDVTSQWVAVPDQALPTKRKWDGVQ  
 ILNQYTKGYLEKEKCVDWLSKFMVSYGHTEFSSADNPPKIYGFVAFKAKTKGQLQTCMATGF  
 YPKDQVQIRKNGVPLTKYDGVYSEGVLPNDDTYQIRKSVQIPEADTHDYEVCHVDHRTL  
 KEPIRKKWDGKCCDGFNIGIIGAVGVVVVLLFLILILVWLKTNNICIRRQTFKDQKQK  
 QDPQNGQTLHNVYSEGGVQNMPLNGSG  
 >Eslu-ZCA XP\_028978597.1 chr.10 NC\_025977:19.042.390-19.048.486  
 MYKLSFLFFVAMAYIVQNQCERYSLNYIYTALSKEPVELPGIHEFTAMGLMNDKQIDYDSD  
 DVKQKIPKQGWMEKLPDPDYWEKGTQSRKSKEQWFKVNVNILMERMRHNNTDVHILQWKH  
 GCEIDEQNGTMRFIKGTQDQYSYDGDFFLAFDDVTSQWVAVPDQALPTKRKWDGVQILNQ  
 YTKGYLEKEKCVDWLSKFMVSYGHEQELKASPPKVYAFAKKARTEGHVRLTCMATGFYPKD  
 VEMQIRKNGVPLTKDGVHSEGVLPNDDTYQIRKSVQIPEADTNDYEVCHVDHRTLTEPQV  
 VKWDGKCCDCSSKGVIIIGSIVGVVVVLLIILIVVLWKRRLDNGSRPWSVPSQNGYING  
 GTNTPVYANGGTGTPA  
 >Eslu-ZDA XP\_028978589.1 chr.10 NC\_025977:19.031.923-19.039.410  
 MYFIVVLLLVGTLSTVDSERYSLNYIYTALSKEPVELPGIHEFTAMGLMNDKQIDYDSDV  
 KQKIPKQGWMEKLPDPDYWEKGTQSRKSKEQWFKVNVNILMERMKHNNTDVHILQWKHGC  
 EVYKQNDGTFQFIKGTQDQYSYDGDFFLAFDDVTSQWVAVPDQALPTKRKWDGVQILNQYT  
 KGYLEKEKCVDWLSKFMVSYGDELKASPPKVYAFAKKARNEGHRVRLTCMATGFYPKDVE  
 MQIRKNGVPLTKDGVHSEGVLPNDDTYQIRKSVQIPEADTNDYEVCHVDHRTLTEPQV  
 WDKCCDCSSSIGVIGSTVGVVLLVLLIILIVVLWKRNRVMTMNCSSSTSSSESGNGSK  
 VSLETEAILTNAVNDVSTSTDSGQASNERLEMLRN  
 >Eslu-ZEA XP\_028978588.1 chr.10 NC\_025977:19.020.042-19.028.369  
 MYFLMLLLFLGALSVDSDRWSLNYIYTALSKEPVELPGIHEFTAMGLMNDKQIDYDSDV  
 KQKIPRQGWMEKLPDPDYWEKGTQSRKSKEQWFKVNVNILMERMKHNNTDVHILQWKHGC  
 EVDKQNDGTLRFIKGTQDQYSYDGDFFLAFDDVTSQWVAVPDQALPTKRKWDGVQILNQYT  
 KGYLEKEKCVDWLSKFMVSYGHQEFSSVDSPPKVYAFAKKARTEGHVRLTCMATGFYPKDVE  
 MQIRKNGVPLTKDGVHSEGVLPNDDTYQIRMTVQIPEADTNDYEVCHVDHRTLTEPQV  
 KWDGKCCDCSQSTVVIIGAVVCVVVLLAIFIAFLVFLWKKGIIGGFRLY

### AF4.3 Deduced L lineage amino acid sequences

>Saal-LLaps No prediction NW\_019943469:81.560-81.919 pseudogene  
 IKTFLEKEKKCIMHKVXPRVRLIQKAMSGAIQQVSCLAFGFYPRHINLTLRDSQPIAEQ  
 ALSGGQLLPNGDGTYLKRSLEVSTEELXERHNYTCTASHLSLDNKLDVSWVPESGADRS  
 >Saal-LCA XP\_023998402.1 NW\_019944620:29.783-37.832  
 MDKLSVFLFVLSFCTIVNAGSGSHSLWALATYIRGETPFPEFTVVVMLDDVQVAYYDSNM  
 KHFIYRGHNTSDKIHDDDEAKNGGFVGVMYHHMKERYFHLKHHNLTEGVQVQORMAGCE  
 MLDNGEPALIVTKNIVNAVVDHAIYYNMTHFTYDAGKLLQGWGMRQAQEKFLYENVLL  
 PLCIRTLKTIKREKNVVMKVPVPRRLINKELSGGLQVSCLAFGFYPRHINLTLXDGQ  
 PVTEQELTGGEVLPSPDGTQYLRKSLEVSTEELKRRHNYTCTASHLSLDNKLDVSWESGA  
 ERVHLSTLSVLLVMLLIVILLGIFIVKRRRSN  
 >Saal-LGA2pt XP\_023998403.1 NW\_019944620:41.294-41.896  
 MMQEYERKVVENVCLPICIKTMKTFKREKNIVMCKVPPRLRLIKKEVSGGLQVSCLAFG

## AF4. Deduced amino acid sequences

FYPRHINLTLRDLGQVPAEQELTGGQVLPSPGDGNYQLRKSLEVSTEELKRRHNYTCTASH  
 LSLDNKLDVSWESGAERVHLSTLSVLLVMLLIVILLGIFICVKRRRSNTASQLKLANVDA  
 NVSEEMILSSTSED

>Saal-LEA XP\_023998401.1 NW\_019944620:51.869-53.649  
 MGKLSVLLFVLSFSTIVNAGSGSHSLWALATYISGETPFPEFTVVVMLDDVQVAYYDSNI  
 KHFIYRVNNTPNKIHNEAQDGAYILGMMYNNMKERSFNLKHHFKFTQVQVQRMMSGCE  
 ILDNGEPVVMFVKDTFNAIYTDQMVYNNMTHFIYDAGKLLGSDGIRQAFERVLFFENVHL  
 PICIRTLKTIKREKNIVMRKVPPRLRLINKEVSGGFQVSCLVFGFHRHINLTLRDSQ  
 PVAEQELTGGEVLPSPGDGTYQLRKSLEVSTEELKRRHNYTCTASHLSLDNKLDVSWESGA  
 ERVHLSTLSVLLVMLPIVILLGIFICVKRRWRCTASQSKLTNVDANVSEEINLSSDSET

>Saal-LHA1ps No prediction NW\_019945788:11.961-12.656 pseudogene  
 HILCGTCNIYSGETPFPEFTVVVMLDDVQVAYYGLHMENFIYRATHQTKRG\*\*EAQDGAH  
 VFVDMYQSMRQII\*TKAPL\*SSGRQVQKQKMACCEMLDNANQPWFMSKDTTNGISADMH  
 YITT\*HIYIRCWDTT\*DGWHNASIWKDTLENYIIPFASEH\*RNISEERKNVCA\*SSSQ  
 TQVDKERGFRCRAGELPGVCFPLPHIQPDLRDLRGGQVTEQS\*QGGQVLPSPGE

>Saal-LHA2ps No prediction NW\_019946183:39.211-39.759 pseudogene  
 GVQVQRMAGCEMLDNGEPAMIMSKNTFNAIYTDRT\*FSTQHIYI\*CWETTRMGWDEQAF  
 QNTFD\*WLLPCIKH\*KTFLKREKNCDA\*SSSQTQVDKRGFWRAPGELPGVWFLPPPHQP  
 DPAERRPASGRGTGADRGGVLPSPGDGTYQLRKSLEVSTEELKRRNSYCTASHLSLDTKLD  
 VRW

>Saal-LBAs No prediction NW\_019946183:39345-40.025 pseudogene  
 SGSGSHSLWALATBIXGETPFPEFTVVVDFDDVQVGYDSNMKEFIYSGLNPTDKIHDDV  
 AQDGAIVFVGTIVPRYKERLQKHHCNLTVFKFSKEWLAVRCWTMVNQ\*SCQRTLSMPF  
 IQIERNFQHNFTTYD-AGKLLGWDGMSKHFRLLINGYFHASNTEKHS\*RERRIVMRKVP  
 PRLRLIKKEVSGGLQVSCLAFGFYPRHINLTLRDLGQVPAEQELTGGE

>Saal-LNapt No prediction NW\_019946183:48.240-48.899  
 SGPGSHSLWALATYIIGETPFPEFTSVGLLDDVQVGYDSKDKLSVYRGLNPTDKMYDDL  
 AQEGDRVFETMYQDMKERAFLKHHFNLTGGVQVQRMAGCEMLDNGEPAMIMYKETFNA  
 IYTDQTVISNTHFTYDAGKLLGWDGMMQDFKRTLYINVHLPRCIRTLKFLKREKKVV  
 MRKVPPRLRLIKKEVSGGLQVSCLAFGFYPRHINLTLRDL

>Saal-LDA XP\_023853355.1 chr.1 NC\_036838.1:57.299.152-57.301.114  
 MGKLSIFLFLVLSFYTIVNAGSGSHSLWALATYIIGETPFPEFTVVVMLDDVQIGYYDSNI  
 KQSVYRGYHITDKMNEAQDGTIVLGTMYHHMKERSFRLKHHNLTEGVHVQQRIGGCEI  
 LHNGEPALIMTKNSFNAI FADYAVYNNMTHFTYDSGKLLGYNWMRQATERTLYANVWIN  
 TLKHTICINTLKKCLNRENFVMRRVPPRLRLIKKEVSGDLQVICLAFGFYPRHINLTLR  
 DGHVPAEQELTGGEVLPSPGDGTYQLRKSIVSTEELRERHNYTCTASHLSLNNKLDVSWE  
 SGAERVHLFILSAPLVMALIVILFCLICLRRIRAS

>Saal-LAA1ps No prediction chr.17 NC\_036857:19.496.374-19.499.780 pseudogene  
 IITGIFVHQRRIGCELVDNEKQGLMIKEVFNGIDGGVLFNFKLQYNYHPMWPELEFNQ  
 RTQYVQMGDLKVFYFPCIK\*LKDYLKKEEKLVMRKVSPRVRFI\*KETQILKGPRTPAWPV  
 YHRHINLTLRDLGQVPAEHELKGRQLLPN\*DWTYQLRKSILTITVQEL\*ERHNYTCTASPV  
 YMDNKLDVSWPDTSPDSASIIIPVVLVMAVVLILIGSLVVFGMWVKHAGFPFSGHIYSV  
 AKDTETEQSNSSELETESTDS

>Saal-LAA2ps No prediction chr.7 NC\_036847:21.281.746-21.283.178 pseudogene  
 VLSILDHVQMGYYDSNAWICISKTGNSDEAFEGVAQITLWDVFLIMRGIQVFNQRLCGCE  
 LMDNXKQGIIMIKESFNGFDGALNFKLQYHPKWPPELAFNQHRPQYIQMGLGKVLHPICI  
 KTLKDYLLKKGEMLMRAFGFYPCINLTLRNGQPVAEHLDTGGQLLPNGDRL\*QLRMNL  
 TINAQELRERGRDIITPVLPLICLDNKLVSW

>Saal-LIAs No prediction chr.36 NC\_036875:17.167.958-17.168.785 pseudogene  
 WAFATCISGEAPFPECSVVLQDDIQVGYFDSNMEQFIHKGPYAPDETEVDVAQDAAYVF  
 GHMFLSMKRRLSDLRYRFNSTGNIDVQQRMTGCEMLETGEPLILSTDAFNAI FADLIYY  
 NMTHYSYNSGNLLSPWSEMHQTYAKWRYQTIYLPICIKTLKLYE\*LKNFVMRKVPRV  
 LIQKAMSGGARVSCLAFGFYPRHINLTLRDLGQVIVEQEMTGGQLLPNGDGTYQLRKSLE  
 VNTEELRERHNYTCTSHLSLDNKLDVSWIPESGID

>Saal-LJAs No prediction chr.2 NC\_036839:31.412.441-31.413.246 pseudogene  
 TYIIGDTPFPEYTVVLMDDIEVGYEWSNVLQHERQII\*LKQRFNFTEGIHVQQRMAGC  
 EMLDNKMLVTLRSRSTFNKTVDAGMCMYNTQNTYYTGNPQLAWDEVKLEYVKMLYAHVYL  
 TLCIKTLKIFLERENNLMRKVRPRVRLIKKAKSGGLQVSCLAFGFYPRHINVTLLRDLGQ  
 PIAEKELTGGQLLPNGDGTYQLRKSLEIIAEDLRERHNYTCTVSHLSLDNKLDASWVPEP  
 GRD

>Onne-LAA1pt XP\_029477974.1 chr.20 NC\_042554.1:16.723.950-16.727.606  
 HVLGETEFPEFCVLWMLDDVQVGYDSKSWRFISRTDGNIDEEYSRTVQGASWDVYLSMR  
 KWSSLLQHRFNSTGIFVHQRLIGCELVDNEKQGLMIKEAFNGIDGGVLFNFKLQYNYH

AF4. Deduced amino acid sequences

PKWPELEFNQQRQTQYVQMGLDKVYLPICIKSLKDYLLKKEEELVMRKVRPRVRLISKESTD  
TAGAKITCLAFGFYPRHINLTLRRDQGPVAEHELKGGGAIATEGDWTYQLRKSLLTITIQE  
LRERPNTCTANHISMDNKLDSVSWGVPTFSGHIYSAKVTEQSNSSLETEPTDS  
>Onne-LAA2ps No prediction chr.7 NC\_042541:47.191.684-47.192.995 pseudogene  
FPESCIVSILDNVQMGYYDSNAWICISKTDGISEAFEGVAQNTFWMFSLMRKQASFL  
HHFNNGIFVNLRRCGCELLDNNKQKIMIKESFNGFDGALNFKLQYHPKWPELAFNQHL  
ENLHLPICIKTLKDYLTGKEMLMRVRV\*KKTLGIQQEQIYSGSIDTHQAFGFYPCINLT  
LLRNGQPVAEHDLTGGQ  
>Onne-LJApS No prediction chr.3 NC\_042537:50.850.799-50.851.083 pseudogene  
LIQKVMVSVGLQMSCLVFGFNPRHTNLTLLRDGQLKAEPEMTGGQLPPNGDWVY\*LRKRLE  
AITEELRERHNYTCTVSHLSLDNKLDSWEPDPR  
>Onne-LIA XP\_029493803.1 chr.1 NC\_042535:19.342.746-19.344.526  
MVKLCFFWLFLSLYTIINAGSHSLAFATCISGEAPFPECSVVLMDQDIQVGYFDSNTEQ  
FIHKGPYAPDETEVDLAQDAANVFGHMFLSMKRRLLDLRYRFNSTGNIDVQQRMAGCEML  
DTGEPGLILSTDAFNAILADLIYYNMTHYSYNSGNLLSPWSEVHQTYAKWRYQTIYLPIC  
IKTLKFLERLKNFVMRKVRPRVRLTQKAMSGGARVSVCLAFGFYPRHINLTLRRDQGPV  
EQDITGGQLLPPNGDGTYQLRKSLEVNTTEELRERHNYTCTTSHLSLDNKLDSWIPESGID  
RVGLYVKSGLMVAIIILLSIFVCRRRNAAGSQTLSQLSNANDAQVAEQMSLSSHSET  
>Onne-LGA2 XP\_029512659.1 NW\_021815573:18.384-20.495  
MGKLSVFLFVLSFYTIIVNAGSGSHLWALATYISGETPFPEFTVVMLDDVQVGYDSDNM  
KQSVYRGQHINDKAEDEEVQDQALVFGDMYQSMKNRFLKFKHFNLTQVQVQKRIAGCE  
MLDNAGEPALVMFKNVFNVTVDYAIYYNMTHFTYDAGQLLQGWGDKRKEVEINNLMEVYL  
PICIKSLKRFLKREKNIVMRKVPPRLRLIKKEVSGGFQVSVCLAFGFYPRHINMTLLRDGQ  
PVAEQELTGGEVLPSPGDGTYQLRKSLEVSTEELKRRHNYTCTASHLSLDNKLDSWESGA  
ERVHLSTL  
>Onne-LNAPS No prediction NW\_021815399:7.214-7.912  
IMYHHMKGRSFHLKHHFNLTGGVQVQQRMSGCEMLDSGEPALIMEKDTFNAIYTDQTLYY  
NMTHFTYDAGKLRPGYDGRREYLRTLFGNVFLPICIRTLKTLKREKNVVMRKVPPQTQ  
VDKERGFVRSVSGELPGVWFLPPPQHLKRRHNYTCTASHLSLDYKLDVSWESGAERVHPST  
LSVLLVMLLILLLGIFICVKRRRTASQT\*SQLATVDAKVEG\*INLSSDSKT  
>Onne-LCA1 XP\_029511433.1 NW\_021813807.1:20.949-23.822  
MGKRSVFLFVLSFCTIIKSGSGSHLWALATYISGETPFPEFTVVGMMLDDVQVTTYDSDNM  
KHFIYRGHNTSDKIHDDEAKNGDFVFGVMYHHMKERYFHLKHHNLTEGVQVQQRMAGCE  
MFDNAGEPALIMTKNTFNAVVDHAIYYNMTHFTYDAGKLLQGWGDMRQLQEKILYENVLL  
TLCIRTLKTLKREKNVVMRKVPPRLRLIKKEVSGRFQMSCLAFGFYPRHINMTLLRDGQ  
PVTEQELTGGEVLPSPGDGTYQLRKSLEVSTEELKRRHNYTCTASHLSLDNKLDSWESGT  
ERVHLFTLSVLLVMLLVVILLGIFICVKRRWSNTASQSKLVNVDATVSEEMNLSSDSET  
>Onne-LGA1 XP\_029511432.1 NW\_021813807:23.923-27.281  
MRGYTIKIMGKLSVFLFVLSFYTIIVNAGPVSHSLWALATYITGETPFPEFTVVMLDDVQ  
VGYDSDNDKQSVYRGQHITEKNKDEAQDQAYVFGVIYQSMKDRSFELKHHFNLTQVQV  
QQKLTGCEMLDNAGEPALVMFKDAFNAIYTDRTLYNMTHFTYDAGKLLQGWGDIRQAYER  
TLYENVYLPICIKSLKILKREKNVVMRKVPPRLRLIKKEVSGGFQMSCLAFGFYPRHIN  
MTLLRDGQPVAEQELTGGEVLPSPGDGTYQLRKSLEVSTEELKSHNYTCTASHLSLDNKL  
DVSWESGAERVHLSTLSALLVMLLIVILLGIFICVKRRWSNTASQSKLVNVDATVSEEMI  
LSSDSEI  
>Onne-LEApt No prediction NW\_021797834:685-1.552  
LWVLATYISGETPFPEFTVVMLDDVQVAYYDSNMKHFYRVNNPNKMHNDNEAQDGAYI  
LGMYYNNMKERSFHLKHHFNLTQVQVQQRMSGCEMLDNAGEPVMFMVKDTFNAIQAFER  
VLFENVHLPICIRTLKTLKREKNIVMREVPPRLRLIKKEVSGGFQMSCLAFGFYPRHIN  
LTLRRDQGPVAEQELTGGEVLPSPGDGTYQLRKSLEVSTEELKRRHNYTCTASHLSLDNKL  
DVSWESGT  
>Onne-LCA2pt XP\_029504626.1 NW\_021794521:1.422-1.907  
MRKVPPRLRLIKKEVSGGFQVSVCLAFGFYPRHINMTLLRDGQPVAEQELTGGEVLPSPGDG  
TYQLRKSLEVSTEELKRRHNYTCTASHLSLDNKLDSWESGTERVHLSTLSALLVMLLVV  
ILFSIFICVKRRWSNTASQSKLANIDATVSEKTNLSSVSET  
>Onne-LLApt XP\_029503466.1 NW\_021791591:126.624-134.137  
MTSLKARSELKRFNSTKGIHVQQLAGCEMSDNAGEPALYADLAIYSNMTHYSYNSGNLL  
PPWSKVHQTNVKGLYQTIYLNICMDTLKTFLEKEKCCIMHKVRPRVRHIQKAMSXDGSSS  
LAIGFYPRHIGQPIAEQALNRGQLLPPNGDDTYQLRKSLEVSTEELRERRNYTCTASHLSL  
DNKLDSVSWVPESGADRSTILSALLVMVSITILICISVCLRRRREAGSQTLSQLSKPC  
>Onne-LCA3ps No prediction NW\_021798966:217-910 pseudogene  
LCNITPLPGSGSHLWALAT\*TAIGETPFPELRLW\*CWMFMKVTMTPTINSLSTGDNIS  
TTKLRMRKLRTELMYLE\*YTRGNLNL\*R\*FELKHHFNLTQGL\*VQQR\*LDCEMMDNAGEPVL

AF4. Deduced amino acid sequences

AVFKDVFNGIFQDMYINMTHYTYDAGKLLLRDGLMQVYKIITFYLPICIKSLKRFLKRE  
 KNVVMREVPRLRLIKKEVSGGFQVSCLAFGFYPRHINMTLLRDGQPVGEQE  
 >Onne-LDA XP\_029502641.1 NW\_021789945:33.648-35.270  
 MGKLSIFLFLVLSFYTIVNAGSGSHSLWALATYIIGETPFPEFTVVLMDVQIGYYDSNM  
 KLSVYRGYHITDKMNDQAQDGTIVLGTMYHHMKERSFRLKHHNLTEGVHVQQRIGGCEI  
 LHNGEPALIMTKNSFNIGFADYAVYINMTHFTYDSGQLLGYNWMRQATERTLYANVWLP  
 ICINTLKKCLNREKFNVMRRVPPRLRLIKKEVSGDLQVICLAFGFYPRHINLTLLRDGHP  
 VAEQDLTGGEVLPSPGDGTIYVSTEELREKHNYTCTASHLSLNNKLDVSWESGAE  
 RVHLFILSAPLVMALIVILFCILICLARRIRAASQNLQLASVDALEADERNLPSDSEI  
 >Onne-LCA4pt XP\_029501170.1 NW\_021786625:5-1.037  
 MGKLSVFLFLVLSFCTIVKSGSGSHSLWALATYISGETPFPEFTVVGMLDDVQVTTYDSNM  
 KHFIYRGHNTSDKIHDEAQQDQAYVFGIMYHHMKERYFHLKHHNLTEGVQVQQRMAGCE  
 MLDNGEPALIMTKNIFNAVFADHAIYINMTHFTYDAGQLLQGWGDIRQAYQRTVYENFYV  
 PICIRTLKRFLKREKNVVMRKVPPRLRLIKKEVSGGFQVSCLAFGFYPRHINMTLLRDGQ  
 PVA  
 >Onki-LEA1 XP\_020329286.2 NW\_022263489:10.300-12.741  
 MGKLSVLLFVHSFSTIVNAGSGSHSLWVLTATYISGETPFPEFTVVMLDDVQVAYYDSNM  
 KHFIYRVNNTPNKMHNDQAQDQAYILGMMYNNMKERSFNLKHHFNLTEGVQVQQRMAGCE  
 MLDNGEPVMMFMVKDTFNAIYTDQMVYINMTHFIYDAGKLLRGWDGMRQAFERVLFFENVHL  
 PICIRTLKRTLLSREKNVVMRKVPPRLRLIKKEVSGGFQVSCLAFGFYPRHINMTLLRDGQ  
 PVAEQELTGGEVLPSPGDGTIYVSTEELKRRHNYTCTIAFHLSLDNKLDVSWESGT  
 ERVHLSTLSVLLVMLLVVILLGIFICVRRWSNTASQSKLVNVDKAVSEEMNLSSVSEA  
 >Onki-LCA1 XP\_031674528.1 NW\_022263489:44.278-46.380  
 MGKLSVFLFLVLSFCTIVKSGSGSHSLWALATYISGETPFPEFTVVMLDDVQVTTYDSNM  
 KHFIYRGHNTSDKIHDEAQQDQAYVFRIMYFHMKERYFHLKHHNLTEGVQVQQRMAGCE  
 MFDNGEPALIMTKNIFNAVFVDHAIYINMTHFTYDAGQLLQGWGMRQLQEKIYENVLL  
 TLCIRTLKTLKREKNVVMRKVPPRLRLIKKEVSGGFQVSCLAFGFYPRHINMTLLRDGQ  
 PVAEQELTGGEVLPSPGDGTIYVSTEELKRRHNYTCTASHLSLDNKLDVSWESGA  
 ERVHLSTLSVLLVMLLVVILLGIFICVGRWSNTASQSKLVNVDATVSEEIILSSDSET  
 >Onki-LCA2 XP\_031675082.1 NW\_022263912:18.540-21.867  
 MGKLSVFLFLVLSFCTIVKSGSGSHSLWALATYISGETPFPEFTVVMLDDVQVTTYDSNM  
 KHFIYRGHNTSDKIHDEAQQDQAYVFRIMYHHMKERYFHLKHHNLTEGVQVQQRMAGCE  
 MFDNGEPALIMTKNIFNAVFVDHAIYINMTHFTYDAGQLLQGWGMRQLQEKIYENVLL  
 TLCIRTLKTLKREKNVVMRKVPPRLRLIKKEVSGGFQVSCLAFGFYPRHINMTLLRDGQ  
 PVAEQELTGGEVLPSPGDGTIYVSTEELKRRHNYTCTASHLSLDNKLDVSWESGT  
 ERVHLSTLSVLLVMLLVVILLGIFICVGRWSNTASQSKLVNVDATVSEEIILSSDSET  
 >Onki-LGA2.1 XP\_020329298.2 NW\_022263912:27.797-30.086  
 MGKLSVFLFLVLSFYTIVNAGSGSHSLWALATYINGETPFPEFTVVMLDDVQVTTYDSND  
 KQSVYRGQHITDKTEDDDAQDEAYIFGDMYQSMKDRSVELKHHNLTEGVQVQQRLTGCE  
 MLDNGEPALAMFKNIFNGISEDYALYNTTHFTYDAGKLLGWDGIMQTLMKTKFKNFYL  
 PICIKNLKRFLKREKNVVMRKVPPRLRLIKKEVSGGFQVSCLAFGFYPRHINMTLLRDGQ  
 PVAEQELTGGEVLPSPGDGTIYVSTEELKRRHNYTCTASHLSLDNKLDVSWESGT  
 ERVHLSTLSVLLVMLLVVILLGIFICVRRWSNTASQSKLANIDATVSEEMILSSDSET  
 >Onki-LGA2.2 XP\_031676068.1 NW\_022265080:6.822-9.114  
 MGKLSVFLFLVLSFYTIVNAGSGSHSLWALATYINGETPFPEFTVVMLDDVQVTTYDSND  
 KQSVYRGQHITDKTEDDDAQDEAYIFGDMYQSMKDRSVELKHHNLTEGVQVQQRLTGCE  
 MLDNGEPALAMFKNIFNGISEDYALYNTTHFTYDAGKLLGWDGIMQTLMKTKFKNFYL  
 PICIKNLKRFLKREKNVVMRKVPPRLRLIKKEVSGGFQVSCLAFGFYPRHINMTLLRDGQ  
 PVAEQELTGGEVLPSPGDGTIYVSTEELKRRHNYTCTIAFHLSLDNKLDVSWESGA  
 ERFHLSTPSVLLVMLLVVILLGIFICVRRWSNTASQSKLANIDATVSEEMILSSDSET  
 >Onki-LNA XP\_020330717.2 NW\_022261980:3.615.302-3.617.889  
 MGKLSVFLFLVLSFSTIVNAGSGSHSLWALANYIIGETPFPEFTAVVMLDDIHVVYYSND  
 KQPVYRGPKPENGKIHDEAVVQDGDYVFGIMYHHMKGRSFHLKHHFNLTEGVQVQQRLTGCE  
 MLDNGEPALIMTKNIFNAIYTDQTYINMTHFTYDAGKLLRGWDGMRQAFERVLFFENVHL  
 PICIRTLKRLKREKNVVMRKVPPRLRLIKKEVSGGFQVSCLAFGFYPRHINMTLLRDGQ  
 PVAEQELTGGEVLPSPGDGTIYVSTEELNKRHNYTCTAFHLSLDNKLDVSWESGA  
 ERVHLSTLSVLLVMLLILILLGIFICVGRRTASQT  
 >OnkiLEA2 XP\_031668801.1 NW\_022261980.1:4.277.226-4.279.638  
 MGKLSVLLFVHSFSTIVNAGSGSHSLWVLTATYISGETPFPEFTVVMLDDVQVAYYDSNM  
 KHFIYRVNNTPNKMHNDQAQDQAYILGMMYNNMKERSFNLKHHFNLTEGVQVQQRMAGCE  
 MLDNGEPVMMFMVKDTFNAIYTDQMVYINMTHFIYDAGKLLRGWDGMRQAFERVLFFENVHL  
 PICIRTLKRTLLSREKNVVMRKVPPRLRLIKKEVSGGFQVSCLAFGFYPRHINMTLLRDGQ  
 PVAEQELTGGEVLPSPGDGTIYVSTEELKRRHNYTCTIAFHLSLDNKLDVSWESGT



AF4. Deduced amino acid sequences

ERVHLSVLLVLLVILLGIFCVRRWSNTASQSKLVNVDKAVSEEMNLSSVSET  
 >Onki-LFA XP\_031668802.1 NW\_022261980.1:4.293.378-4.296.692  
 MAKLSVLFILFYITIGNAGSGSHSLWALATYINGETPFPEFTVVVMLDDVQVAYYDSNMK  
 HFIYRVNNTPNKMHDEAODGAYVFGIYQSMKERYFHLKHHNLTEGVQVQQRMSGCEM  
 LDNGEPALIMFKETFNGIFVDHAIYNSMTHFTYDSGTLVGGYIRQAYEKALFENVLLP  
 ICIKSLKRFLKREKNVVMRKVPPRLRLIKKEVSGGFQVSCLAFGFYPRHINMTLLRDGQP  
 VAEQDLTGGEVLPSPGDGTYQLRKSLEVSTEELKRRHNYTCTASHLSLDNKLDVSWESGAE  
 RVHLSVLLVLLVILLGFMFICVMRWRCTASHLELSLQKRERK  
 >Onki-LGA1 XP\_031668490.1 NW\_022261980.1:4.306.192-4.309.687  
 MGKLSVFLFVFSFYITVIVNAGSGSHSLWALATYITGETPFPEFTVVVMLDDVQVAYYDSND  
 KQSVYRGQHITKNDDEAODGAYVFGVIYQSMKDRSAKLKHHNLTEGVQVQQRKITGCE  
 MLDNGEQALVMFKDVFNAIYTDRTLYNMTHTFTYDAGKLLLGWDGMRQAYERTLYENVYL  
 PICIKSLKILKREKNVVMRKVPPRLRLIKKEVSGGFQVSCLAFGFYPRHINMTLLRDGQ  
 PVAEQELTGGEVLPSPGDGTYQLRKSLEVSTEELKRRHNYTCTPSHLSLDNKLDVSWESGA  
 ERVHLSVLLVLLVILLGIFCVKRRWSNTASQSKLVNMGATVSEEMILSSDSEI  
 >Onki-LDA XP\_020350446.1 chr.1 NC\_034174:12.150.462-12.152.115  
 MLHFKIMGKLSIFLFLVLSFYITVIVNAGSGSHSLWALATYIIGETPFPEFTVVVMLDDVQIG  
 YYDSNMKLSVYRGYHITDKMNDEAODGTYVLGTMYYHMKERSFRLKHQLNLTEGVHVQQR  
 IGGCEIRHNGEPALIMTKNSFNGIFADYAVYYNMTHTFTYDSGQLLLGYNWMMQATDRTLY  
 ANVWLPICINTLKKCLNREKNFVMRRVPPRLRLIKKEVSGDLQVICLAFGFYPRHINLTL  
 LRDGHPVAEQELTGGEVLPSPGDGTYQLRKSIVSTEELREKHNCTCTASHLSLNNKLDVS  
 WESGAERVHLFILSAPLVMALIVILFCILICLARRIRAASQNLQLASVDALEADERNLSS  
 DSEI  
 >Onki-LIA No prediction chr.26 NC\_034199:18.984.593-18.983.787  
 AFATCISGEAPFPECSVVLMDQDDIQVGYFDSNTEQFIHKGPYAPDETEVDVAQDAANVFG  
 HMFLSMKRRSLDLRYHFNSTGNIDVQQRMAGCEMLDTGEPGLILSTDAFNAILADLIYYN  
 MTHYSYNSGNLLSPWSEVHQTYVVKWHYQTIYLPICIKTLKFRERLKNFAMRKVRPRVRL  
 TGARVSCLAFGFYPRHINLTLRDGQPIVEQDMTGGQLLNGDGTYQLRKSLEVNIIEELS  
 ERHNYTCTTSHLSLDNKLDVSWIPESGID  
 >Onki-LAA1pt No prediction chr.24 NC\_034197:17.676.225-17.679.167  
 LATHVLGETEFPEFCVLWMLDDVQVGYDSNSWRFI SRTDGNIDEEYSRTVQASWDVYL  
 SMRWSSLLQHRFISTTGLIGCELVDNEKQGLMKKEAFNGIDGGVRHINLTLRDGQPV  
 AEHELKGGQLLPGAIAIEGWDWTYQLRKSITITVQELRERQAVCPDTPGDSASIIIPVVL  
 VMAVVLILIGILVFGMWWKHTG  
 >Onki-LAA2ps chr.17 No prediction NC\_034190:65.180.493-65.181.877 pseudogene  
 FPEFCVVSILDNVQMGYYDSNAWICISKTGDGIDEAFEGVAQNTFWDMLSMRKQASFL  
 HHFNNGIFVNLRRCCCELLDNNKQKIMIKESFNGFDGALNFNKMQYHPKWPKLACNQR  
 TQYIQMGLGKASPPICIKTLKDYLLKKGEMLMVRRAFGFYPCHINLTLRNGQPVAEHDLT  
 GGQLLPNGDRL\*QLRMSLTISAQELRE  
 >Onki-LLApt No prediction chr.2 NC\_034175:69.317.237-69.317.864  
 SLKARSSELKRFNSTKGIHVQHMLAACEMSDNGEPALII SKDSFNIGIYADLAIYSNMTHY  
 SYNSGNLLPWSKVHQTYVVKGLYQTIYLNMATLKTFLKKEKCCIMHKVPPRVRI IQKLAF  
 GFYPRHINLTLRDGQPIAEQALNTRQLLNGDGTYQLRKSLEVSTEELRERNYCTAS  
 YLSLDNKLDVNWVPECEADRS  
 >Onts-LDA XP\_024239748.1 chr.2 NC\_037098:52.252.264-52.253.911  
 MLHFKIMGKLSIFLFLVLSFYITVIVNAGSGSHSLWALATYIIGETPFPEFTVVVMLDDVQIG  
 YYDSNMKLSVYRGYHITDKMNDEAODGTYVLGTMYYHMKERSFRLKHHNLTEGVHVQQR  
 IGGCEILHNGEPALIMTKNSFNGIFADYAVYYNMTHTFTYDSGQLLLGYNWMMRQATER  
 TLY ANVWLPICINTLKKCLNREKNFVMRRVPPRLRLIKKEVSGDLQVICLAFGFYPRHINLTL  
 LRDGHPVAEQELTGGEVLPSPGDGTYQLRKSIVSTEELREKHNCTCTASHLSLNNKLDVS  
 WESGAARVHLFILSAPLVMALIVILFCILICLARRIRAASQNLQLASVDALEADERNLSS  
 DSEI  
 >Onts-LAA1pt XP\_024239354.1 chr.22 NC\_037118:18.137.866-18.149.768  
 MKSIQEQFKVRLGTCTSVWRKWSLLQHRFNSTTVHPRVRLISKESTDTAGAKITCLAFG  
 FYPRHINLTLRDGQPVAEHELKGGQLLXPWDWTYQLRKSITITVQELRERPDYTCTANH  
 ISMDNKLYVSWVPDTPGDSASIIIPVVLVMAVVLILIGILV  
 >Onts-LAA2ps no prediction chr.16 NC\_037112:54.025.063-54.026.488 pseudogene  
 FPEFCVVSILDNVQMGYYDSNAWICIPKTDGIDEAFEGVAQNTFWDMLSMRKQASFL  
 HHFNNGIFVNLRHCCCELLDNNKQKIMIKESFNGFDGALNFNKLQYHPKWPPELAFNQR  
 TQYIQMGLGKASPPAFGFYPCHINLTLRNGQPVAEHDLTGGQLLPNGDRL\*QLRMSLT  
 ISAQELRERERERHNYTCTATHLS  
 >Onts-LIA XP\_024244907.1 chr.26 NC\_037122:19.640.524-19.641.996  
 MVKLCFFWFLSLYTTINAGSHSLAFATCISGEAPFPECSVVLMDQDDIQVGYFDSNTEQ

FIIHKGPCAPDETEVDVAQDAANVFGHMFLSMKRRLSDLRFRNSTGNIDVQQRMAGCEML  
 DTGEPGLIILSTDAFNAILADLIYYNMTHYSYNSGNLLSPWSEVHQTYAKWRYQTIYLPIC  
 IKTLKKFLERLKNFVMRKVRPRVRLTQKAMSGGARVSCCLAYGFYPRHINLTLRRDGGQPIV  
 EQDMTGGQLLPNGDGTQYLRKSLEVNTTELRRERHNYTCTTSHLSLDNKLDVSWIPESGID  
 SVGLYVKSGLMVAIIILLSIFVCVRRRRAAGSQTLSQLSNANDAQVAEQMSLSSHSET  
 >Onts-LNA1 XP\_024264664.1 NW\_020130735:43.853-46.470  
 MGKLSVFLFVLSFSTIVNAGSGSHSLWALANYIIGETPFPEFTVVVMLDDIHVAYYDSND  
 KQPVYRGPKPTGKIHDELFDQDGDYVFGIMYHHMKGRSFHLKHHFNLTGGVQVQQRMMSGCE  
 MLDNGEPALIMEKDTFNAIYTDQTLYNYMTHFTYDAGKLRPGYDGVRRREYLRTLYGNVFL  
 PICIRTLKTIKREKNAVMRKVPPRLRLIKKEVSGEFQVSCCLAFGFYPRHINLTLRRDGGQ  
 PVAEQELTGGEVLPSPGDGTQYLRKSLEVSTEELKRRHNYTCTASHLSLDNKLDVSWESGA  
 ERVHLSLTVLLVMLLVVILLGIFICVKGRRRTASQT  
 >Onts-LNA2 XP\_024264663.1 NW\_020130735:91.015-93.632  
 MGKLSVFLFVLSFSTIVNAGSGSHSLWALANYIIGETPFPEFTVVVMLDDIHVAYYDSND  
 KQPVYRGPKPTGKIHDELFDQDGDYVFGIMYHHMKGRSFHLKHHFNLTGGVQVQQRMMSGCE  
 MLDNGEPALIMEKDTFNAIYTDQTLYNYMTHFTYDAGKLRPGYDGVRRREYLRTLYGNVFL  
 PICIRTLKTIKREKNAVMRKVPPRLRLIKKEVSGEFQVSCCLAFGFYPRHINLTLRRDGGQ  
 PVAEQELTGGEVLPSPGDGTQYLRKSLEVSTEELKRRHNYTCTASHLSLDNKLDVSWESGA  
 ERVHLSLTVLLVMLLVVILLGIFICVKGRRRTASQT  
 >Onts-LKA1ps No prediction NW\_020130477:58.887-59.660 pseudogene  
 FPEFTVVVMLDDVQVYTYDSKRDFHFKAHFNLTGGVQVQQRMMSGCEMLDNGEQACSW\*RT  
 LPCHYTDQMVF\*NI\*FLYAGNYYEDGMDEASI\*KVVLFRMFTVPPCLRTQKTLLSREEE  
 RCDA\*VPPRLRLIKKEVSGGFQVSCCLAFGFYPRQGEVLPSPGDGTQYLRKSLEVSTEELKK  
 RHNYTCTASHLSLDNKLDVSWESGT  
 >Onts-LFA1ps No prediction NW\_020130477:66.136-66.960 pseudogene  
 SPGSGSHSLWALATI\*AERPF\*VYCGDVGCVQVAYYDSNMKHFYIRGHNTSDKIHDLL  
 AQDGAIVFVGIYQS\*KRDPST\*STT\*ISRKELSSAKMSDVSVGHGEPALSCLRGLLMAFL  
 \*IMRYLQHDTFYNTILGHYL\*VLWVRQAYEKALFENVLLPICIKSLKRFLTREKNIVMRK  
 VPPRLRLIKKEVSGGFQVSCCLAFGFYPRHINLTLRRDGGQVPAEQELTGGEVLPSPGDGTQ  
 LRKSLEVSTGELKRRHNYTCTAFHLSLDNKLDVSW  
 >Onts-LGA2.1ps No prediction NW\_020130477:80.914-80.085 pseudogene  
 GSGSHSLWALATYITGETPFPEFTVVVMLDDVQVAYYDSNDKQSVYRIYQSMKDRSVELK  
 HFNLTGEGVQVQKLTGCEMLDNGEPVLMFKGVFNAIYVLPICRKSILKRFLKREKNVVM  
 RKVPPRLRLI\*KEVSGGFQVSCCLVFGFYPRHINMTLLRDGGQVPAEQELTGGEVLPSPGDGT  
 YQYLRKSLEVSTEELKRRHNYTCTASHLSLDNKLDVSW  
 >Onts-LCA1 No prediction NW\_020130477:83.100-83.996  
 YKMFITHFTLTALPGSGSHSLWALATYISGETPFPEFTVVVMLDDVQVYTLDSNMKHFYI  
 RGHNTSDKINDEDEDKNGXVFXIMYNHMKERYFHLKHHNLTEGVQVQQRMAGCEMFNG  
 EPALIMTKNTFNVAIVFDHAIYYNLTHFTYDAGQLLQGWGIRQAQEKILYENVLLPICIK  
 TLKTIKREKRVNMRKVPPRLRLIKKEVSGGFQVSCCLAFGFYPRHINMTLLRDGGQVPAEQ  
 ELTGGEVLPSPGDGTQYLRKSLEVSTEELKRRHNYTCTASHLSLDNKLDVSWESGAEMSS  
 >Onts-LCA2 No prediction NW\_020130477:163.908-164.804  
 YKMFITHFTLTALPGSGSHSLWALATYISGETPFPEFTVVVMLDDVQVYTLDSNMKHFYI  
 RGHNTSDKINDEDEDKNGXVFXIMYNHMKERYFHLKHHNLTEGVQVQQRMAGCEMFNG  
 EPALIMTKNTFNVAIVFDHAIYYNLTHFTYDAGQLLQGWGIRQAQEKILYENVLLPICIK  
 KTLKTIKREKRVNMRKVPPRLRLIKKEVSGGFQVSCCLAFGFYPRHINMTLLRDGGQVPAEQ  
 ELTGGEVLPSPGDGTQYLRKSLEVSTEELKRRHNYTCTASHLSLDNKLDVSWESGAEMSS  
 >Onts-LGA2.2ps No prediction NW\_020130477:166.990-167.819 pseudogene  
 GSGSHSLWALATYITGETPFPEFTVVVMLDDVQVAYYDSNDKQSVYRIYQSMKDRSVELK  
 HFNLTGEGVQVQKLTGCEMLDNGEPVLMFKGVFNAIYVLPICRKSILKRFLKREKNVVM  
 RKVPPRLRLI\*KEVSGGFQVSCCLVFGFYPRHINMTLLRDGGQVPAEQELTGGEVLPSPGDGT  
 YQYLRKSLEVSTEELKRRHNYTCTASHLSLDNKLDVSW  
 >Onts-LFA2ps No prediction NW\_020130477:180.944-181.768 pseudogene  
 SPGSGSHSLWALATI\*AERPF\*VYCGDVGCVQVAYYDSNMKHFYIRGHNTSDKIHDLL  
 AQDGAIVFVGIYQS\*KRDPST\*STT\*ISRKELSSAKMSDVSVGHGEPALSCLRGLLMAFL  
 \*IMRYLQHDTFYNTILGHYL\*VLWVRQAYEKALFENVLLPICIKSLKRFLTREKNIVMRK  
 VPPRLRLIKKEVSGGFQVSCCLAFGFYPRHINLTLRRDGGQVPAEQELTGGEVLPSPGDGTQ  
 LRKSLEVSTGELKRRHNYTCTAFHLSLDNKLDVSW  
 >Onts-LKA2ps No prediction NW\_020130477:188.244-189.017 pseudogene  
 FPEFTVVVMLDDVQVYTYDSKRDFHFKAHFNLTGGVQVQQRMMSGCEMLDNGEQACSW\*RT  
 LPCHYTDQMVF\*NI\*FLYAGNYYEDGMDEASI\*KVVLFRMFTVPPCLRTQKTLLSREEE  
 RCDA\*VPPRLRLIKKEVSGGFQVSCCLAFGFYPRQGEVLPSPGDGTQYLRKSLEVSTEELKK  
 RHNYTCTASHLSLDNKLDVSWESGT

AF4. Deduced amino acid sequences

>Onts-LEA XP\_024264766.1 NW\_020130833:12.771-13.858  
MGKLSVLLFLHSFSTIVNAGSGSHSLWALATYIIGETPFPEFTVVVMLDDVQVTTYDSNM  
KHFIYRVNNTPNKMHNDNEAQDGAYILGMMYNNMKERSFHLKHHFNLTGGVQVQQRMSGCE  
MLDNAGEPAMFMVKDTFNAIYTDQMVYNNMTHFXDYDAGKLLRGWDGMRQAFERVLFFENVHL  
PICIRTOQTLLSREKNVVMRKVPPRLRLIKKEVSGGFQVSCLAFGFYPRHINLTLLRDSQ  
PVAEQELTGGEVLPSPGDGTQYLRKSLLEVSTEELKRRHNYTCTASHLSLDNKLDVSWESGT  
ERVHLSTL

>Onts-LFA3 XP\_024264767.1 NW\_020130833:17.067-17.597  
MGKLSVLFIFSYTIGNAGSGSHSLWALATYISGETPFPEFTVVVMLDDVQVAYYDSNMK  
HFIYRGHNTSDKIHDDLAQDGAYVFGIYQSMKERSFHLKHHNLTEGVQVQQRMSGCEM  
LDNAGEPALIMFKETFNGIFVDHAI FNSMTHFTYDSGTLVGYGIRQAYEKALFENVLLP  
ICIKSLKRFLKREKNIVMRKVPPRLRLIKKEVSGGFQVSCLAFGFYPRHINLTLLRDGQP  
VAEQELTGGEVLPSPGDGTQYLRKSLLEVSTEELKRRHNYTCTASHLSLDNKLDVSWESGA  
ERVHLFILSAPLVMALIVILFCILICLARRIRAASQNLQLASVDALEADERNLSSDSEI

>Onmy-LHA1 XP\_021463538.1 chr.6 NC\_035082:75.466.317-75.468.798  
MCKLSVFLIVLSFYTIVNAGSGSHSLWALATYINGETPFPEFTVVVMLDDVQVGYYSNM  
KECIYSGLNPTDKIHDDLAQDGAYVFGTMYQSIKERSFQLKHHNLTEGVQVQQRMSGCE  
MLDNAGEPALIMTKDTFNAIHTDRTLTYNITHLTYDAGKLLPGWDAMRKEYLRTLFEKVFL  
PICIKTMKTFILKREKNVVMRKVPPRLRLIKKEVSGGFQVSCLAFGFYPRHINLTLLRDGQ  
PVAEQELTGGEVLPSPGDGTQYLRKSLLEVSTEELKRRHNYTCTASHLSLDNKLDVSWESGA  
ERVHLFILSAPLVMALIVILFCILICLARRIRAASQNLQLASVDALEADERNLSSDSEI

>Onmy-LAA1 XP\_021421958.1 chr.16 NC\_035092:45.979.845-45.987.016  
MNFYTLFLIYLPVIVNAGKSSHSLWGLATHVLGETEFPEFCVLWMLDDVQVGYYSNSWRF  
ISRTDENIDEEYSKTVQASWDVYLSMRKRSSLLQHRFNSTTGIFVHQRLIGCELEDNEK  
QGQLMIKEAFNGIDGGVLFNFKLQYNYHPKWPELEFNQORTQYIQMGLDKVYLPICIKSL  
KDYLKKEEKLVMRKVPRVRLISKESTDTEGAKITCLAFGFYPRHINLTLLRDGQPVAEH  
ELKGGQLLPNGDWTYQYLRKSLTITVQELRERPNTCTANHISMDNKLDVSWVPDTPGDSA  
SIIPVVLVMAVLLILIGILVIGMVKWKHAGVPTFSGHIYSAAKDTETEKSNSSLETEST  
DS

>Onmy-LAA2ps no prediction chr.9 NC\_035085:48.584.161-48.585.737  
FPEFCVVSILDNGQMGYYDSNAWICISKTDGISEAFEGVAQNRFDWDFLSMRKQVSFLL  
HFFNNGIFVFNQRHCCELLDNEQQQIMIKESFNFGDGFALNFNKLQHPKWPKLAFNQHRT  
QYIQMGLGKAALIKLHLPIKIKTLKDYLLKKGEMLMVRRGAFGFYPCINLTLLRNGQRVA  
EHDLTGGQLLPNGDRL\*QLRMSLTISAQELRERERHHYCTATHLS

>Onmy-LDA XP\_021425739.1 chr.17 NC\_035093:67.362.765-67.364.428  
MLHKATLQNHGQTVNLFVCSFILHHCQRRGYHITDKINDEAQDGSYVLGTMYYHMKERSF  
RLKHHNLTEGVHVQQRIGGCEILHNGEPALIMTKNSFNIGFADYAVYNNMTHFTYDSGQ  
LLGYNWMRQATERLYANVWLPICINTLKKCLNREKNFVMRRVPPRLRLIKKEVSGDLQ  
VICLAFGFYPRHINLTLLRDGHPVAEQELTGGEVLPSPGDGTQYLRKSIYVSTEELREKHN  
YTCTASHLSLDNKLDVSWESGAERVHLFILSAPLVMALIVILFCILICLARRIRAASQNL  
QLASVALEADERNLSSDSEI

>Onmy-LIA XP\_021434561.1 chr.22 NC\_035098:9.835.124-9.837.436  
MVKLCFFWFLSLYTIINAGSHSLAFATCISGEAPPECSVVLQDDIQVGYFDSNTEQ  
FIHKGPYAPDETEVDVAQDAANVFHGMFLSMKRRLSDLRFRFNSTGNIDVQQRMSGCEML  
DTGEPGLLLSTDAFNAILADLIYYNMTHSYNSGNLLSPWSEVHQTYVKWHYQTIYLPIC  
IKTLKTFRESLKNFVMRKVPRVRLIQKAMSGGARVSCLAYGFYPRHINLTLLRDGQPIL  
EQDMTGGQLLPNGDGTQYLRKSLLEVITEELRERHNYTCTTSHLSLDNKLDVSWIPESGID  
RVGLYVKSGLPMVAIIILLSIFVCVRRRNAAGSQTLSQLSNANDAQVAEQMSLSSHSET

>Onmy-LHA2 XP\_021442420.1 chr.26 NC\_035102:33.688.970-33.692.422  
MCKLSVFLIVLSFYTIVNADPGSHSLWALATYIIGETPFPEFTVVVMLDDVQVGYYSNM  
KHLIYSGLPYKIRDEAQDGAYVFGIYQSIKERSFQLKHHNLTRGVQVQQRQIAGCEM  
LNNGELMIMSKNTFNAAFVDHEIYYNMTHFTYNSGKLLPEWDAMRREYLKTLFGNVLLPI  
CIRTLKTIKREKNIVMRKVPPRLRLIKKEVSGGLKVSCLAFGFYPRHINLTLLRDGQPV  
AEQELTGGEVLPSPGDGTQYLRKRLLEVSTEELKRRHNYTCTASHLSLDNKLDVSWESGAER  
VHLSLTSALLVMLLVVILLGIFICVRRRRSASQALVTTCKR

>Onmy-LEA1pt XP\_021442443.1 chr.26 NC\_035102:33.977.597-33.980.079  
MRKVPPRLRLIKKEVSGGLKVSCLAFGFYPRHINMTLLRDGQPVAEQDLTGGEVLPSPGDG  
TYQYLRKSLLEVSTEELKRRHNYTCTASHLSLDNKLDVSWESGAERVHLSTFSALLVMLLIV  
ILLGIFICVRRRWRYTASQSKIANVDKAVSEEMNLSSDSET

>Onmy-LGA XP\_021442415.1 chr.26 NC\_035102:33.996.968-34.014.691  
MGKLSVFLVLSFYTIVNAGSGSHSLWALATYISGETPFPEFTVVVMLDDVQVTTYDSND  
KQSVYRGQHITDKTEDDDAQDEAYIFGDIYQSMKDRSVELKHHFNLTQVQVQQRRLTGCE  
MLDNAGEPALAMFKNIFNGISEDYALYNSHFTYDAGKLLLGWDGIMQTLMKTKFENFYL  
PICIKNLKRFLKREKNIVMRKVPPRLRLIKKEVSGGFQVSCLAFGFYPRHINMTLLRDGQ

AF4. Deduced amino acid sequences

PVAEQDLTGGEVLPSPGDGTYQLRKSLEVSTEELKRRHNYTCTAFHLSLDNKLDVSWEFGA  
ERVHLFTLSALLVMLLIVILLGIFFCVKRRWSNTASQSKLANIDATVSEETNLSSDSET  
>Onmy-LFA XP\_021442419.1 chr.26 NC\_035102:34.008.645-34.010.877  
MGKLSVLFVFFISFFITIGNAGSGSHSLWALATYISGETPFPEFTVVVMLDDVQVGYDSDNMK  
HFIYKGHNTSDKIHDDEAKNGDFVFGVMYHHMKERYFHLKHHNLTEGVQVQQRMSGCEM  
LDNGEPALIMFKETFNFIYVDHAIYNSMTHFIYDSGTLLGYYGIRQAYEKALFENVLLP  
ICIKSLKRFLKREKNVVMRKVPPRLRLIKKEVSGGFQVSCLAFGFYPRHINLTLLRDGQP  
VAEQDLTGGEVLPSPGDGTYQLRKSLEVSTEELKRRHNYTCTAFHLSLDNKLDVSWESGTE  
RVHLSTLSVLLVMMMLILILSIFICVKRRWRCTASHLKLVDNIDAKA  
>Onmy-LBA1 XP\_021442411.1 chr.26 NC\_035102:34.020.825-34.024.713  
MRGYTIKIMGKLSVLFVFSFYTIYNAGSGSHSLWALATYISGETPFPEFTVVVMLDDIQ  
VTYYDSNMKHFYKGHNTSDKIHDDEAKNGDFVFGVMYHHMKERYFHLKHHNLTEGVQV  
QQKLTGCEMFDNGEPALVMFKDAFNAIYTDRTLYNMTHFTYDAGKLLLGWDGMRQAYER  
TLYENVYLPICIKSLKLIKREKNIVMRKVPPRLRLIKKEVSGGFQVSCLAFGFYPRHIN  
LTLLRDGQPVAEQDLTGGEVLPSPGDRTYQLRKSLEVSTEELKRRHNYTCTASHLSLDNKL  
DVSWESGAERVHLSTLSALLVMLLVVILLGIFICVKRRWSNTASQSKLANVDATVSEEMN  
LSSDSET  
>Onmy-LEA2 XP\_021442414.1 chr.26 NC\_035102:34.061.638-34.063.352  
MGKLSVLLFVHSFSTIVNAGSGSHSLWVLTATYISGETPFPEFTVVVMLDDIQVTYYDSNM  
KHFIYRVNNTPNKMHNDNEAQDGAYVFGMMFNMMKERSFNLKHHNLTEGVQVQQRMSGCE  
MLDNGEPVMFVVKDTFNAIYTDQMVCMYTHFIYDAGKLLRGWDGMRQAFERVLFFENVHL  
PICIRTLKTIKREKNIVMRKVPPRLRLIKKEVSGGLKVSCLAFGFYPRHINLTLLRDGQ  
PVAEQDLTGGEVLPSPGDGTYQLRKSLEVSTEELKRRHNYTCTASHLSLDNKLDVSWESGA  
ERVHLSTLSVLLVMLLVVILLGIFICVKRRWSNTASQSKLANVDATVSEEINLCSSEN  
>Onmy-LEA3 XP\_021442418.1 chr.26 NC\_035102:34.066.830-34.069.490  
MGKLSVLLFVHSFSTIVNAGSGSHSLWVLTATYISGETPFPEFTVVVMLDDIQVTYYDSNM  
KHFIYRVNNTPNKMHNDNEAQDGAYVFGMMFNMMKERSFNLKHHNLTEGVQVQQRMSGCE  
MLDNGEPVMFVVKDTFNAIYTDQMVCMYTHFIYDAGKLLRGWDGMRQAFERVLFFENVHL  
PICIRTLKTIKREKNIVMRKVPPRLRLIKKEVSGGLKVSCLAFGFYPRHINLTLLRDGQ  
PVAEQDLTGGEVLPSPGDGTYQLRKSLEVSTEELKRRHNYTCTASHLSLDNKLDVSWESGA  
ERVHLSTFSALLVMLLIVILLGIFICVRRWRYTASQSKIANVDAKVSEEINLSSDSET  
>Onmy-LCA XP\_021442413.1 chr.26 NC\_035102:34.070.204-34.072.325  
MGKLSVFLFVLSFCTIVNSGSGSHSLWALATYISGETPFPEFTVVVMLDDVQVTYYDSNM  
KHFIYKGHNTSDKIHDDEAKNGDFVFGVMYHHMKERYFHLKHHNLTEGVQVQQRMSGCE  
MFDNGEPALIMTKNTFNAVFVDHAIYNNMTHFTYDAGKLLQWDGMRQLQEKILYENVLL  
TLCIRTLKTIKREKNVMMRKVPPRLRLIKKEVSGGFQVSCLAFGFYPRHINLTLLRDGQ  
PVAEQELTGGEVLPSPGDRTYQLRKRLEVSTEELKRRHNYTCTASHLSLDNKLDVSWESGA  
E  
>Onmy-LBA2pt XP\_021442442.1 chr.26 NC\_035102:34.084.331-34.089.088  
MRKVPPRLRLIKKEVSGGLKVSCLAFGFYPRHINLTLLRDGQPVVEQELTGGEVLPSPGDG  
TYQLRKRLEVSTEELKRRHNYTCTASHLSLDNKLDVSWESGAERVHLSTLSALLVMLLVV  
ILLGIFICVKRRWSNTASQSKLANVDATVSEEINLSSDSET  
>Satr-LAA1ps no prediction chr.30 NC\_042986:17.684.542-17.685.599  
F\*IITGIFVHQRLIGCELVDNVKQG\*LTIKEVFNGIDGGILNLFNELQYNYHPKWPELEFN  
QQRQYVQMGDLKDYLPICIKSLKDYLKKEEKLVMRKVSPRVRFISKESTDSEGAKITCL  
AFPFPYPRHINLTLLRDGQPVAEHQLKGGQLLPN\*DWTYQLRNSLPITVQEL\*ERRERHNY  
TCTASHIRMHNTLDVSWPDTSPDSASII PVVLMMAVVFILIGSLVFGMWWKHTG  
>Satr-LAA2pt no prediction chr.28 NC\_042984:22.516.693-22.518.122  
SNAWICVSKTDGNSDEAFETVAQNTFCGVFLSMRKQLSFLQHRFNKDTGIFVNQRRGCEL  
RDNDKQGGQIMIKESFNGIDGDLNKLQYHPKWPELVFNQHRQYIQMGLEKVRPLPICIK  
TLKDYLKKEEMLVMRGLWYTNCLLNIRNTTGANLQAFGFYPCHINLTLLRNGQPVAEH  
DLIGGQLLPNGDRLYQLRMSLTISAQELRERERDIITPLLPICLDNKLDVSW  
>Satr-LNaps no prediction chr.12 NC\_042968.1:35.027.883-35.028.903  
SGLGSHSL\*ALATYIIGETPFPEFTVVVMLDDVQVGYDSDKDKLSVYRGFNPTNKIYDDL  
AQEGHSVFQTMHYGMKERAFQLKHHYNTGGVQVQQRMSGCEMLDNGEPAMIMYKETFNA  
IYTDQTVISNTTHFTYDSGKLLLGWDGMMQDFKRTLSINVHLPRCIRTQKTLKREKNIV  
MHKVPPRLRLIKKEVSGGFQVSCLAFGFYPRHINLTLLRDGQPVAEQELTGGEVLPSPGDG  
TFQLRKSLEVSTEELKRRHNYTCTASHLSLDNKLDVSWESGAERVHLSTLSVLLMMLLIL  
ILLVIFICVKRRRRTASKALSQLANVDAKVAEEMNLSSDSAT  
>Satr-LGA2.3 No prediction chr.12 NC\_042968.1:35.639.205-35.640.653  
MGKLSVFLFVLSFYPIVNAGKGGSGSHSLWALATYISGETPFPEFTVVVMLDDVQVTYYD  
SNDKQYVYRQNIKEKTEDDEAKDEAHYGDYHSMKDRSFELKHHNLTEGVQVQQRWT  
GCEMMDNGEPGLAMFKNIFNGISEDYAMYNTTHVYTNAGKILLGWDWKMAYNINKFEN

AF4. Deduced amino acid sequences

YYLPICIKHLKTLKREKNIVMRKVPPRLRLIKKEVSGGFQVSCLAFGFYPRHINLTLLR  
 DGQPVAEQELTGGEVLPSPGDGTYQLRKSLEVSTEELKRRHNYTCTASHLSLDNKLDVSWE  
 SGAERVHLSTLSVLLMMLLILILLVIFICVKRRWSNTASQMKLANFDKAVSEEMNLSSDS  
 ET  
 >Satr-LMA2 No prediction chr.12 NC\_042968.1:35.651.573-35.652.582  
 GSGSHSLWALATYIRGETPFPEITVVVMLDDVQVAYYDSNMKHFYIRGHNTSDKIHDEAQ  
 EGAYLLGKMYHHMKERSFNLKHHFNLTGEGVQAQQRMSCGCEMLDNGEPVLMVKDTFNAIY  
 TDQMYYNMTHFIYDAGKLLLGWDGMRQAYERVLFENVHLPICIRIQTLLKREKNVVMR  
 KVPRLRLIKKEVSGGFQVSCLAFGFYPRHINLTLLRDGQPVAEQELTGGEVLPSPGDGTY  
 QLRKSLEVSTEELKRRHNYTCTASHLSLDNKLDVSWESGAERVHVKRRRSNTASQSELAN  
 VDAKVSEEMNLSSVSET  
 >Satr-LGA2.4 XP\_029623984.1 chr.12 NC\_042968.1:35.665.172-35.667.127  
 MTRGYTITIMGKLSVFLFVLSFYPIVNAGSGSHSLWALATYISGETPFPEFTVVVMLDDV  
 QVTTYDSNDKQYVYRGQNIKEKTEDDEAKDEAHIYGDIYHSMKDRSFELKHHFNLTGEGVQ  
 VQQRWTGCEEMMDNGEPGLAMFKNIFNGISEDYAMYNTTHVTYNAGKILLGWDWKMAYN  
 INKFENYYLPICIKHLKTLKREKNIVMRKVPPRLRLIKKEVSGGFQVSCLAFGFYPRHI  
 NLTLRLDQGPVAEQELTGGEVLPSPGDGTYQLRKSLEVSTEELKRRHNYTCTASHLSLDNK  
 LDVSWESGAERVHLSTLSVLLMMLLILILLVIFICVKRRWSNTASQMKLANFDKAVSEEM  
 NLSSDSET  
 >Satr-LMA3 No prediction chr.12 NC\_042968.1:35.686.748-35.687.758  
 GSGSHSLWALATYIRGETPFPEFTVVVMLDDVQVAYYDSNMKHFYIRGHNTSDKIHDEAQ  
 EGAYLLGKMYHHMKERSFNLKHHFNLTGEGVQAQQRMSCGCEMLDNGEPVLMVKDTFNAIY  
 TDQMYYNMTHFIYDAGKLLLGWDGMRQAYERVLFENVHLPICIRIQTLLKREKNVVMR  
 KVPRLRLIKKEVSGGFQVSCLAFGFYPRHINLTLLRDGQPVAEQELTGGEVLPSPGDGTY  
 QLRKSLEVSTEELKRRHNYTCTASHLSLDNKLDVSWESGAERVHVKRRRSNTASQSELAN  
 VDAKVSEEMNLSSVSET  
 >Satr-LGA2.5 XP\_029623985.1 chr.12 NC\_042968.1:35.700.358-35.702.313  
 MTRGYTITIMGKLSVFLFVLSFYPIVNAGSGSHSLWALATYISGETPFPEFTVVVMLDDV  
 QVTTYDSNDKQYVYRGQNIKEKTEDDEAKDEAHIYGDIYHSMKDRSFELKHHFNLTGEGVQ  
 VQQRWTGCEEMMDNGEPGLAMFKNIFNGISEDYAMYNTTHVTYNAGKILLGWDWKMAYN  
 INKFENYYLPICIKHLKTLKREKNIVMRKVPPRLRLIKKEVSGGFQVSCLAFGFYPRHI  
 NLTLRLDQGPVAEQELTGGEVLPSPGDGTYQLRKSLEVSTEELKRRHNYTCTASHLSLDNK  
 LDVSWESGAERVHLSTLSVLLMMLLILILLVIFICVKRRWSNTASQMKLANFDKAVSEEM  
 NLSSDSET  
 >Satr-LMA4 No prediction chr.12 NC\_042968.1:35.712.951-35.713.960  
 GSGSHSLWALATYIRGETPFPEFTVVVMLDDVQVAYYDSNMKHFYIRGHNTSDKIHDEAQ  
 EGAYLLGKMYHHMKERSFNLKHHFNLTGEGVQAQQRMSCGCEMLDNGEPVLMVKDTFNAIY  
 TDQMYYNMTHFIYDAGKLLLGWDGMRQAYERVLFENVHLPICIRIQTLLKREKNVVMR  
 KVPRLRLIKKEVSGGFQVSCLAFGFYPRHINLTLLRDGQPVAEQELTGGEVLPSPGDGTY  
 QLRKSLEVSTEELKRRHNYTCTASHLSLDNKLDVSWESGAERVHVKRRRSNTASQSELAN  
 VDAKVSEEMNLSSVSET  
 >Satr-LGA2.6 XP\_029623983.1 chr.12 NC\_042968.1:35.729.951-35.731.907  
 MTRGYTITIMGKLSVFLFVLSFYPIVNAGSGSHSLWALATYISGETPFPEFTVVVMLDDV  
 QVTTYDSNDKQYVYRGQNIKEKTEDDEAKDEAHIYGDIYHSMKDRSFELKHHFNLTGEGVQ  
 VQQRWTGCEEMMDNGEPGLAMFKNIFNGISEDYAMYNTTHVTYNAGKILLGWDWKMAYN  
 INKFENYYLPICIKHLKTLKREKNIVMRKVPPRLRLIKKEVSGGFQVSCLAFGFYPRHI  
 NLTLRLDQGPVAEQELTGGEVLPSPGDGTYQLRKSLEVSTEELKRRHNYTCTASHLSLDNK  
 LDVSWESGAERVHLSTLSVLLMMLLILILLVIFICVKRRWSNTASQMKLANFDKAVSEEM  
 NLSSVSET  
 >Satr-LMA5 No prediction chr.12 NC\_042968.1:35.742.639-35.743.650  
 GSGSHSLWALATYIRGETPFPEFTVVVMLDDVQVAYYDSNMKHFYIRGHNTSDKIHDEAQ  
 EGAYILGKMYHHMKERSFNLKHHFNLTGEGVQAQQRMSCGCEMLDNGEPVLMVKDTFNAIY  
 TDQMYYNMTHFIYDAGKLLLGWDGMRQAYERVLFENVHLPICIRIQTLLKREKNVVMR  
 KVPRLRLIKKEVSGGFQVSCLAFGFYPRHINLTLLRDGQPVAEQELTGGEVLPSPGDGTY  
 QLRKSLEVSTEELKRRHNYTCTASHLSLDNKLDVSWESGAERVHLSTLSVLLMMLLIVIL  
 LVIFICVKRRWSNTASQSELANVDAKVSEEMNLSSVSET  
 >Satr-LMA6 No prediction chr.12 NC\_042968.1:35.745.282-35.746.293  
 GSGSHSLWALATYIRGETPFPEFTVVVMLDDVQVAYYDSNMKHFYIRGHNTSDKIHDEAQ  
 EGAYILGKMYHHMKERSFNLKHHFNLTGEGVQAQQRMSCGCEMLDNGEPVLMVKDTFNAIY  
 TDQMYYNMTHFIYDAGKLLLGWDGMRQAYERVLFENVHLPICIRIQTLLKREKNVVMR  
 KVPRLRLIKKEVSGGFQVSCLAFGFYPRHINLTLLRDGQPVAEQELTGGEVLPSPGDGTY  
 QLRKSLEVSTEELKRRHNYTCTASHLSLDNKLDVSWESGAERVHLSTLSVLLMMLLIVIL  
 LVIFICVKRRWSNTASQSELANVDAKVSEEMNLSSVSET

AF4. Deduced amino acid sequences

>Satr-LCA2 XP\_029622515.1 chr.12 NC\_042968.1:35.752.335-35.758.141  
MCTKTCYTRKHFNLHGQAVCILFVLSFYTIVNSGSGSHSLWALATYISGATPFPEFTVVV  
MLDDVQVTTYDSNMKNFIYSGHNNTSDKIHDDEAKNGDFVFGVMYHHMKERYFHLKHHLLNL  
TEGVQVQORMAGCEMFDNGEPALIMTKNIFNAVFDRAIYYNITHFTYDAGKLLQGWGDM  
RQAQEKILYENVLLTICIRTLKTLKREKNIVMRKVPRLRLIKKEVSGGFQVSCLAFGF  
YPRHINLTLRRDGPVAEQELTGGEVLPSPGDGTYQLRKSLEVSTDELKRRHNYTCTASHL  
SLDNKLDVSWESGAERVHLSLTVLLMMLLILILLVTFICVKRRWSNTASQSELANVDAK  
VSEEMNLSSVSET

>Satr-LCA1 XP\_029623986.1 chr.12 NC\_042968.1:35.796.559-35.799.118  
MGKLSIFLLVLSFYTIVNAGSGSHSLWALATYIRGETPFPEFTVVVMLDDVQVTTYDSNM  
KHFIYRGHNNTSDKIHDDEAKNGDFVFGVMYHHMKERYFHLKHHLLNLTEGVQVQORMAGCE  
MLDNGEPALIMTKNIFNAVFDHAIYYNITHFTYDAGKLLQGWGDMRQAQEKILYENVLL  
TLCIRTLKTLKREKNIVMRKVPRLRLIKKEVSGGFQVSCLAFGFYPRHINLTLRRDGP  
PVAEQELTGGEVLPSPGDGTYQLRKSLEVSTDELKRRHNYTCTASHLSLDNKLDVSWESGA  
ERVHLSLTVLLMMLLILILLVTFICVKRRWSNTASQSELANVDAKVSEEMNLSSVSET

>Satr-LDA XP\_029630277.1 chr.14 NC\_042970.1:10.704.457-10.706.122  
MGKLSIFLFLVLSFYTIVNAGSGSHSLWALATYIIGETSFPPEFTVVMLDDIQIGYYDSNI  
KQSVYRGYHITDKMNDEAQDGTIVLGTMYDHMKERSFRLKHHLLNLTEGVHVQQRIGGCEI  
LHNGEPALIMTKNSFNAIFEDYAVYYNMTHFTYDSGKLLGYNWLRQATERTLYTNVWLP  
ICINTLKKCLKRENFMRRVPPRLRLIKKAVSGDIQVICLAFGFYPRHINLTLRRDGHVP  
AEQELTGGEVLPSPGDGTYQLRKSIVSTEELRERHNYTCTASHLSLNKLDVSWESGAER  
VHLFILSAPLVMALIVILFCIFICLVRRIRAASQNLQLASVDALEADAMNLSSDSEKT

>Satr-LIA XP\_029558880.1 chr.20 NC\_042976:33.824.877-33.826.457  
MAKLCFFLILLSLYTIVNPGSHSLWAFATCISGEAPFPECSVVLQDDIQVGYFDSNKEQ  
FIHKGPYAPDETEVEEAQDAAYVFGHMFSLMKRRLSDLRYRFNSTGNIDVQORMAGCEML  
DTGEPGLILSTDAFNAILADLIYYNMTHSYNSGNLLSPWSEVHQTYAKWRYQTIYLPVC  
IKTLKRFLERLKNFVMRKVRPRVRLIQKAMSGGARVSCLAFGFYPRHINLTLRRDGPPIV  
EQEMAGGQLLPPNGDGTIYQLRKSLEVNTTEELRERHNYTCTSHLSLDNKLDVSWIPESGMD  
RVGLYVKSAPLATVAIIILLSIFVCVRRRNTAGSQTLSQLSNANDAQVAEQISLSSHSET

>Satr-LJaps No prediction chr.24 NC\_042980:29.522.035-29.522.883  
SGSGSHSLWAFATYIIGDTPFPEYSVLLLLDDIEVGYERQFVYRGHNALDEKEMGIVLD  
IASVFGAMSFMSKGRSYDLKQLFYFTEGIHVQQRMACCEMLDNDKLVLIILSRSTFNKIVA  
DGMCMYNTQNTYYTGNPQLAWDEVKLEYVKMLYAHVYLPCLIKTLNIFLERKKNIVMRKV  
RPRIRLIKAKSGGLQVSCLAFGFNPRHTNLTLRRDSQPIAEQELTGGQLPPNGDWVY\*L  
RKSLEVITEELRERHNYTCTVSHLSLDNKLDVSWVPEPGRDRV

>Satr-LLaps No prediction chr.24 NC\_042980:40.874.193-40.876.693  
SGSGSHSLWAFATYISG\*TPFPVLTVVMLDDFQVGYFDSNICKRYIHKGYNASEETEVEE  
AYHIAFIFGAMSFSLRAR\*SELKRFNKEGIVHVQQRLAGCEMSDNGEPALIVSRESLNGI  
YADLAIYYNMTHSYNSGKLLYVKGLYQTIYLNICMDTLKTFLEKEKCCIMRKVRPRVRL  
IQKDLSSGGVQMQSCLPFGFYPRHINLTLRRDGRPIAEQVNLGGQLLHNGDGTIYQLRKSIV  
VSTQELREERHNYTCTASHLSLDNKLDVSWVPEPGRDRV

>Satr-LGA1.2 XP\_029576627.1 chr.29 NC\_042985.1:9.458.865-9.462.166  
MRGYTIKIMGKLSVFLVFSFYTIVSPGSGSHSLWALATYIVGETPFPEFTVVVMLDDVQ  
VAYYDSNDKQSVYRGQHITKTKDDEAQDGAHVFGVIYQSMKDRSFELKHHFNLTGVQVQ  
QKITGCEMLNNGESALIMFKDVFNAIYTDRTLYNMTHFTYDAGKLLGWDGIRQAYERT  
LYENVYLPICIKSLKRLKREKNIVMRKVPRLRFIKKEVSGGFQVSCLAFGFYPRHINL  
TLRRDGPVAEQELTGGEVLPSPGDGTYQLRKSLEVSTEELKRRHNYTCTASHLSLDNKLD  
VSWESGAERVHLSLTVLLMMLLILILLGIFICVKRRWSNTASQSKLANVDAKVSEEINL  
SSDSET

>Satr-LFA XP\_029576634.1 chr.29 NC\_042985.1:9.468.567-9.471.475  
MGKLSVLFILFYTIGNAGSGSHSLWALATYINGETPFPEFTVVVMLDDVQVGYDSNMK  
DFIYRGHNPTDKIHDDVAQDGAIVFGIYQSIKERSFHLKHQLNLTEGVQVQORMSGCEM  
LDNGEPALIMFKETFNFIYVDHAIYNSMTHFTYDSGTLGYYGIRQAYEKALFENVLLP  
ICIKNLKTIKREKNIVMRKVPRLRFIKKEVSGGFQVSCLAFGFYPRHNNLTLRRDGP  
VAEQELTGGEVLPSPGDGTYQLRKSLEVSTDELKRRNYTCTASHLSLDNKLDVSWESGAE  
RVHLSLTVLLMMLLIVMLFGIFICVKRRWRCTASHLKLNVNDAKA

>Satr-LGA1.1pt XP\_029576636.1 chr.29 NC\_042985.1:9.493.218.-9.494.900  
VRPTCAREVKERSFQLKHQFILTEGVQAQKITGCEMLNNGEPALIMFKDVFNAIYTDRT  
LYNMTHFTYDAGKLLGWDGIRQAYERTLYENVYLPICIKSLKRLKREKNVVMRKVPP  
RLRLIKKEVSGGFQVSCLAFGFYPRHINLTLRRDGPVAEQELTGGEVLPSPGDGTYQLR  
SLEVSTEELKRRHNYTCTASHLSLDNKLDVSWESGAERVHLSLTVLLMMLLILILLGIF  
IFVKRRWSNTASQSKLANVDANVSEEMYLYSVSET

>Satr-LHA XP\_029576650.1 chr.29 NC\_042985.1:10.157.491-10.162.043

AF4. Deduced amino acid sequences

MDKLSVFLFVLSFYTVVNTGSGSHSLWAFATYIIGETPFPEFTVVVMLDDVQVGYDSNM  
 KDFIYSGLTYYKIHDNVAQDGAIVFGIYQTIKEGSFQLKHHFNLTRGVQVQORMAGCEM  
 LDNDEPALIMSKNTFNAVAFADHEIYYNITHFTYNSGKLLPEWDAMRREYLRTLFGNVLLP  
 ICIKNLKTLFKIEKNVVRKVPRLRLIKKEVSGGFQVSCLAFGFYPRHINLTLRRDQGP  
 VAEQELTGGEVLPSPGDGTQYLRKSLEVSTEELKRRHNYTCTASHLSLDNKLDVSWESGAE  
 RVHLSTLSVLLMMLLILILLGLFICIKRRRRTASQALSQLANVDAKVAEEINLSSDSAT  
 >Satr-LGA2.1ps No prediction NW\_021823199:7.823-8.843 pseudogene  
 GSGSHSLWALATYISGETPFPPFPPEFTVVVMLDDVQVYYELQR\*TVCLQGPKYQRENRG  
 \*\*SKG\*SSYNMEISTTA\*RPPIELKHHFNLTQVQVQQRWTCCEMMDNGEPGLAMFKNIF  
 NGISEEYAMYYNTHVTYNAGKILLGWDWKMAYNINKFENYYPICIKHLKTLKREKN  
 IVMRKVPRLRLIKKEVSGGFQVSCLAFGSTPATSNLTLRRDQGPVAEQELTGGEVLPSPG  
 DGTQYLRKSLEVSTEELKRRHNYTCTASHLSLDNKLDVSWESGAERVHLSTLSVLLMMLL  
 ILILLVIFICVRRWSNTASQMKLANFVDAKVEEMNLSSDSET  
 >Satr-LMA1 No prediction NW\_021823199:19.749-20.758  
 GSGSHSLWALATYIRGETPFPEFTVVVMLDDVQVAYYDSNMKHFYIRGHNTSDKIHDEAQ  
 EGAYLLGKMYHHMKERSFNLKHHFNLTQVQVQQRMSGCEMLDNGEPLIMVKDTFNAIY  
 TDQMVYYNMTHFIYDAGKLLLGWDGMRQAYERVLFFENVHLPICIRTOKTLKREKNVVR  
 KVPRRLRLIKKEVSGGFQVSCLAFGFYPRHINLTLRRDQGPVAEQELTGGEVLPSPGDGT  
 YLRKSLEVSTEELKRRHNYTCTASHLSLDNKLDVSWESGAERVHVKRRRWSNTASQSELAN  
 VDAKVEEMNLSSVSET  
 >Satr-LGA2.2ps No prediction NW\_021823199:33.983-35.055  
 SIFPYYLKKCVYIHSRFRITFSVGTNCNIYKRRETPPEFTVVVMLDDVQVYYDSNDK  
 QYVYRGQNIKEKTEDDEAKDEAHIYDIIYHSMKDRSFELKHHFNLTQVQVQQRWTCCEM  
 MDNGEPGLAMFKNIFNGISEDMMYYNTHVTYNAGKILLGWDWKMAYNINKFENYYPIC  
 IKHLKTLKREKNIVMRKVPRLRLIKKEVSGGFQVSCLAFGFYPRHINLTLRRDQGPVA  
 EQELTGGEVLPSPGDGTQYLRKSLEVSTEELKRRHNYTCTASHLSLDNKLDVSWESGAERV  
 HLSTLSVLLMMLLILILLVIFICVRRW\*\*HCLPDETCQL\*CKVSEEMNLSSVSET  
 >Sasa-LAA1ps No prediction chr.13 NC\_027312:22.597.045-22.598.101  
 F\*IITGICVNRQLTGCELVDNVKQG\*LMIKEVFNGIDGGVLFNFELQYNYHPKWPELEFN  
 QQRQYVQMGDLKDYLPICIKSLKDYLKKEEKLVMRKGVRVSPRVRFISKESTDSEGAKIT  
 CLAFFFYPRHINLTLRRDQGPVAEHELKGGQFLPK\*DWTYQLRKSLPITVQDLRERHNYT  
 CTASRISMHNKLDVSWPDTSPDSASIIIPVVLVMAVVIILIGSLVVFVGMWKKHAG  
 >Sasa-LAA2pt no prediction chr.15 NC\_027314:79.225.661-79.226.008  
 TGI FVNQRRGCELRDNDKQGQIMIKESFNGIDGALNFNKLQYHPKWPELVFNQHRTQYIQ  
 MGLGK  
 >Sasa-LCA XP\_013983104.1 chr.11 NC\_027310:38.173.444-38.175.944  
 MGKLSVFLFVLSFYTVVNSGSGSHSLWALATYISGETPFPEFTVVVMLDDVQVAYYDSNM  
 KHFIYRGHNTPNKIHDDEAKNGDFVFGVMYHHMKERYFHLKHHNLTEGVQVQORMAGCE  
 MFDNGEPALIMTKNTFNAVAFADHAIYYNITHFTYDAGKLLQGWDGMRQAQEKILYENVLL  
 TLCIRTLKTLKREKNIVMRKVPRLRLIKKEVSGGFQVSCLVFGFYPRHINLTLRRDQGP  
 VAEQELTGGEVLPSPGDGTQYLRKSLEVSTEELKRRHNYTCTASHLSLDNKLDVSWESGA  
 ERVHLSTLSVLLMMLLILILLVTFICVRRRWSNTASQSELANVDAKVEEMNLSSDSEN  
 >Sasa-LCApt No prediction chr.11 NC\_027310:38.129.721-38.130.194  
 MYYNISHYTYDAGKLLGRDGMMAQYKITLLETFFYLPLCIKSLKTLKREKNVVRKVP  
 SVTLVKKEVYRRFQVSCLAFGFYPRHINLTLRRDQGPVAEQELTGGEVLPSPGDGTQYLRK  
 SLEVSTEELKRRHNYTCTASHLSLDNKLDVSW  
 >Sasa-LDA XP\_013989407.1 chr.12 NC\_027311:80.563.693-80.565.337  
 MGKLSIFLFLVLSFYTVVNSGSGSHSLWALATYIIGETPFPEFTVVVMLDDVQIGYDSNI  
 KQSVYRGYHITDKMNDQAQDGTYYLGTMYDHMKERSFRLKHHNLTEGVHVQQRIGGCEI  
 LHNGEPALIMTKNSFNAIFEDYAVYYNMTHFTYDSGKLLGYNWIRQATERTLYANVWLP  
 ICINTLKKCLKRENFVRRVPPRLRLIKKAVSGDIQVICLAFGFYPRHINLTLRRDGHVP  
 AEQELTGGEVLPSPGDGTQYLRKSIYVSTEELRERHNYTCTASHLSLNKLDVSWESGAER  
 VHLFILSAPLVMALIVLFCIFICLVRRIRASQNLQLASVDALEAEMNLSSDSEKT  
 >Sasa-LFA XP\_014031975.1 chr.26 NC\_027325.1:38.686.632-38.689.189  
 MGKLSVLFILFYITIGNAGSGSHSLWALATYINGETPFPEFTVVVMLDDVQVGYDSNMK  
 DFIYRGHNTDKIHDDVAQDGAIVFGIYQSIKERSFHLKHQLNLTEGVQVQORMSGCEM  
 LDNGEPALIMFKETFNGIFVDHAIYNSMTHFTYDSGTLGYYGIRQAYEKALFENVLLP  
 ICIKNLKTLKREKNVVRKVPRLRLIKKEVSGGLQVSCLAFGFYPRHINLTLRRDQGP  
 VAEQELTGGEVLPSPGDGTQYLRKSLEVSTEELKRRHNYTCTASHLSLDNKLDVSWESEAE  
 RVHLSTLSVLLMMLLILILLGIFICVRRWRCTASHLKLNVDAK  
 >Sasa-LGA XP\_014031973.1 chr.26 NC\_027325.1:38.706.031-38.709.086  
 MGKLSVFLFVLSFYTVVNSGSGSHSLWALATYIIGETPFPEFTVVVMLDDVQVAYYDSND  
 KQSVYRGQHITKTKDDEAQAQDGAHVFRVIYQSMKDRSFELKRRHFNLTQVQVQQRWTCCEM

AF4. Deduced amino acid sequences

LNNGESALVMYKDFVNAIYTDRTLYNMTHFTYDAGKLLLGWDGIRQAYERTLYENVYLP  
 ICIKSLKRLKREKNIIVMRKVPPRLRLIKKEVSGGFQVSCLAFGFYPRHINLTLLRDGQP  
 VAEQELTGGEVLPSPGDGTYQLRKSLEVSTEELKKRHNCTASHLSLDNKLDVSWESGAE  
 RVHLSTLSVLLMMLLILILLGIFICVKRRWSNTASQSELANVDKAVSEEINLSSDSET  
 >Sasa-LHA XP\_014032010.1 chr.26 NC\_027325.1:40.134.217-40.138.243  
 MGKLSVFLFVLSFYTIANAGSGSHSLWALATHIIGETPFPEFTVVVMLDDVQVGYDSNM  
 KHFIYSGHNPTDKIHDDVAQDGAYVFGTMYQSIKERSFHLKYHLNLRGVQVQORMAGCE  
 MLNNGEPALIMSKNTFNAIYTDRTLYNMTHFTYDAGKLLPGWDAMREYLRLIFGNVFL  
 PICIKTMKTFLKMEKNVVMRKVPPRLRLIKKEVSGGLQVSCLAFGFYPRHINLTLLRDGQ  
 PVAEQELTGGEVLPSPGDGTYQLRKSLEVSTEELKKRHSYCTASHLSLDNKLDVSWEPGA  
 ERVHLFTISILLMMLLIVILLGIFICVKRRRCTASQAFVTSCQHGGH  
 >Sasa-LIA XP\_014019802.1 chr.21 NC\_027320.1:21.859.914-21.861.394  
 MAKLCFFLILLSLYTIIVNAGSHSLWAFATCISGEAPFPECSVVLMDIIVQVGYFDSNKEQ  
 FIHKGPYAPDETEVEEAQDAAYVFGHMFLSMKRRLSDLRVFNSTGNIDVQORMAGCEML  
 DTGEPGLILSTDAFNAILADLIYNNMTHSYNSGNLLSPWSEVHQTYTKWHYQTIYLPVC  
 IKTLKRFLERLKNFVMRKVRPRVRLIQKAMSGGACVSCLAFGFYPRHINLTLLRDGQPIV  
 EQEMTGGQLPNGDGTQMRKSLEVNTTEELRERHNYCTTSHLSLDNKLDVSWIPESGMD  
 RVGLYVKSAPLATVAIIILLSIFCVRRRNTAGSQTLSQLSNANDAQVAEQISLSSHSET  
 >Sasa-LJaps No prediction chr.25 NC\_027324:29.534.954-29.535.742  
 GSHSLWAFATYIIGDTPFPEYTVLLLLDDIEVGYEERQFVYRGHNALDEKEMGIVLDIAS  
 VFGAMSFMSKGRSYDLKQLFHFTEGIHVQORMACCEMLDNDKLVLIISRSTFNKIVADGM  
 CYNMTQNTYYTGNPQLAWDEVKLEYVKMLYAHVYLPICIKTLNIFLEREKNIVMRKVRPR  
 IRLIKKAKSGGLQVSCLVFGFNPRHTNLTLLRDSQPIAEQELTGGLPPNGDWAY\*LRKS  
 LEVITEELRERHNYCTVSHLSL  
 >Sasa-LKapt No prediction chr.10 NC\_027309:82.183.979-82.184.266  
 KVPRLRLIKKEISGGFQVSCLVFGFYPRHINLTLLRDGQPVAEQELTGGEVLPSPGDGTY  
 QLRKSLEVSTEELKKRHNCTASHLSLDNKLDVSW  
 >Sasa-LLaps No prediction chr.25 NC\_027324:41.418.460-41.420.842  
 TVVLMDDIIVQVGYFDSNKRKRIHKGYNASEETEVEEAYHIAFIFGPMFSLRARSSELKR  
 FNS\*EGIHVQQLAGCEMSDNGEPALIVSSLNGIYADSAIYNNMTHSYNSGKLFPPWSE  
 VHQTYYVKGLYQTIYLNICMDTLKTFLEKEKCCIMHKVHARVRLIQKDMGGVQQMCLPF  
 GFYPRHINLTLLRDGRPIAEQVLNNGGQLPNGDGTQQLRKSLEVSTQELRERHNYCTA  
 SHLSLDNTLDVSW  
 >Sasa-LEA No prediction NW\_012354073:3.249-4.233  
 MAKLSVLLFIHSFYTVNAGSGSHSLWALATHIIGETPFPEFTVVVMLDDVQVAYYDSNM  
 KDFIYRVNPNPSDKIHDEAQEGAYVFGVIYQSIKERSFQLKHHFILTEGVQAQQRMSGCEM  
 LDNGEPAMVMVKDTFNAIYTDQMVYNNMTHFIYDAGKLLPGWDGMRQAYERVLFEVHLP  
 ICIRTQKTLKIEKNVVMRKVPPRLRLIKKEVSGGLQVSCPAFGFYPRHINLTLLRDGQP  
 VAEQELTGGEVLPSPGDGTYQLRKSLEVSTEELKKRHNCTVSHLSLDNKLDVSW  
 >Eslu-LBA No prediction chr.02 NC\_025969:9.994.527-9.995.536  
 GSGSHSLWALATYIIGETPFPEFIVVVMMLDDVQVGYDYSKIKQPVYKGYHTSDKTKDDVA  
 GNKILYTAYENMYNNMKARSSELNQVFNFTERFQVQSQISGCEMLDNGDQALIMTKNNLN  
 SIYTDYAIYNNNTHFTYDAGNLLVGHDEKIQTLYLFQNVWVFPICIQTLKRCLKREKNVVMR  
 KVAPRLRLIKKRVSEGRVSCLAFGFYPRHINLTLLRDGQPVAEQELTGGEVLPSPGDGTY  
 QMRKSLEVSTKELMERHQYSCTASHLSLDNKLDVSWNSEVERVHLSILSAPLVMVSVVML  
 LGIYRCVKWR  
 >Eslu-LCA XP\_010875198.1 chr.02 NC\_025969.4:10.005.995-10.009.199  
 MGKLDVFLQLFFCTIVNTGSGSHSLWAFATYIIGETSFPPEYTIIVMLDDVQVIYYSND  
 KHTVYRGHNTTHKINSNEIPDRTYLFEDIYHRMKERSYDYKRRFNHTEGIQVQQSMGGCE  
 MLDNGDPALIMMKDIFNAISVDHAFYNIHITYYDPGKLLLGWDGIRQAVERSLVENVYL  
 PLCIKSLKAWLKREKNVVMRKVAPRLRLIKKDVSGGLRVTCCLAFGFYPRHINLTLLRDGQ  
 PVAEQELTGGEVLPSPGDGTYQMRKSLEVSTKELMERHQYSCTASHLSLDNKLDVSWKSGA  
 ERVHLSILSALLVIVLIVILLGISICLARRRRLTDNFTTCKR  
 >Eslu-LPA XP\_019909495.1 chr.15 NC\_025982:6.802.982-6.806.755  
 LDIEKHSVTLGSGSHSLWALATYIIGETPFPEFTVVVMLDDIIVQVGYDSNNHQLLQKGH  
 EVPDKIDDDISQDSGRFVFGSMLNEMKARSSDLQRYFNSTDGIHVQORMAGCEMKDNGKP  
 VLVMSADMYDGTVSDWLSFNMTHTSYTTEGEPGLPWGEIQINFVKLHFQHVYLPICIRSLK  
 VRLEREKSTVMRKVRPRVRLIQKAMSGGVKVSCLAFGFYPRHINLTLLRDSQPIADQDLT  
 GGEVLPNGDKTYQLRKTLEVRTEELNEKHNYCTASHLSLDNKLDVSWVPELEVRDGRFS  
 LLVPLVMMGICLLCVFICIKRKRSTSSKTSQFLNTNEVGPIIS  
 >Eslu-LIA XP\_010888243.1 chr.20 NC\_025987:10.835.945-10.837.883  
 MRELRFFFLLSTYSIVNAGSGSHSLWAFATCISGETPFAECSVVLMMDDIIVQVGYFDSNT  
 ERFVHKGHNTQNDVDMADATYVFGHMFLSLKRRLSALKYRYNSTGDIVVNQRMGTGCE



MLDN GEPALFLSTDAFNGIYADLIHYNITHYSYNSGNLLSPWSQVHQTNAKWRYQTIYLP  
 ICIKTLKKFLEKENNFVMRKVRPRVRLIQKAVSGGTRVSVCLAFGFYPRHINLTLQRDGGQT  
 IPDQEL SAGLVLP SADGT YQLR KSLTVSAEELSEKHSYTCSTFHLSLDNKLDVSWVPRDG  
 TDPVLVSI P SAAVLIACLAILLACVWRRR NAAGTHVPHLSNADEAQA VEQISLSSHDS

#### AF4.4 Deduced S lineage amino acid sequences

>Saal-SAA XP\_023991886.1 NW\_019942612:111.299-114.376  
 MITTILISFMQFSIVAPHS LHRHC IATQGTLYPKNIQLVMIDDVIVYYN S SAEQEAVVP  
 EWLNHPEGIEFQEVHRNLKFNRYVMDTAVRVTSEHYNHSHDFYQAHGRCGWKSDGTTE  
 AFMSHAYDGKDFV SFDVSTRWTAAVSHAVFYKRKRETDLEDLVRLVIHYESGCIRWLK  
 LLQFSVTFREP KVPVAVSLFERSPHGNSEVEVTCHVTGFYPRAVQVEWLGAEGLPMVDGVS  
 SGEVLPNGDGSYQLR KSLTVPQEAQDTQSY SCLVLHSSKAENITVTWAPKKNL PNVLMAT  
 VIIIVSVVLILT VLVFYL VWRRAVAQNPE

>Saal-SBAps LG22 No orf chr.22 NC\_036862:35.259.299-35.262.616  
 HCIATQWILNPKLVHVMIDDVIVY\*YNSSAEQEAVMPEWLNHPEGIEFWRD VNRNLNCN  
 RYVMDTAVRVTSEHYNH\*HSGQTWAAAVFQAVHFRKCRANGAFDLES LYECIVRLK TIL  
 KYAAWIHDKKS P S SACY\*\*KRPTDTLQGGGHVTGFY P QAVQVE\*LTGQGLPLVDRVSSGE  
 VLPNGDGSYQLR KSSSVPQGSQDTQRY SCLLHSSVARNITVTW

>Onne-SAA XP\_029537278.1 chr.14 NC\_042548.1:49.264.637-49.267.655  
 MITTILISFMQFSIVAPHS LHRHC IATQGTLYPKNIQLVMIDDVIVYYN S SAEQEAVVP  
 EWLNHPEGIEFQEVHRNLKFNRYVMDTAVRVTSEHYNHSHDFYQAHGRCGWKSDGTTE  
 AFMSHAYDGKDFV SFDVSTRWTAAVSHAVFYKRKRETDVEDLVRLVIHYESGCIRWLEK  
 LLEFSVTVREP KVPVAVSLFERPPHGNSEVEVTCHVTGFYPRAVQVEWLGAEGLPMVDRVS  
 SGEVLPNGDGSYQLR KSLTVPQEAQDTQSY SCLVLHSSIAGNITVTWAPKKNLANVLMAI  
 VIIIVSVVLILT VLVLIKYL VWRRAVGKSQ

>Onne-SBAps chr.11 No prediction NC\_042545:1.740.497-1.736.849  
 HCIATQWILNPKLVHVMIDDVIVY\*YNSSGKQEAVMPEWLNHPEGIEFWRD VNRNLNCN  
 QYVMDTAVRVTSEYNY\*HTADLHLGGYVTFGFY P QAVQVEWLGAQGLPLVDRVSSGEVLP  
 NGDGPYQLR KSPSPVQGSQDTQRYSC

>Onki-SAA XP\_020324114.1 chr.18 NC\_034191:16.365.696-16.368.709  
 MITTILISFMQFSIVAPHS LHRHC IATQGTLYPKNIQLVMIDDVIVYYN S SAEQEAVVP  
 EWLNHPEGIEFQEVHRNLKFNRYVMDTAVRVTSEHYNHSHDFYQAHGRCGWKSDGTTE  
 AFMSHAYDGKDFV SFDVSTRWTAAVSHAVFYKRKRETDLEDLVRLVIHYESGCIRWLEK  
 LLEFSVTVREP KVPVAVSLFERPPHGNSEVEVTCHVTGFYPRAVQVEWLGAEGLPMVDGVN  
 SGEVLPNGDGSYQLR KSLTVPQEAQDTQSY SCLVLHSSIAGNITVTWAPKKNLANVLMAI  
 VIIIVSVVLILT VLVFKYL VWRRAVAQNPE

>Onki-SBAps chr.15 NC\_034188:77.214.861-77.218.450 pseudogene  
 HCIATQWILNPKLVHVMIDDVIVYSYNSSGKQEAVMPEWLNHPEGIEFWRD VNRNLNCN  
 RYVMDTAVRVTSEHYNH\*HLKRPTDDLHLGGYVTRFYPQAVQVEWLGAQGLPLVDRVSSG  
 EVLPNGDGSYQLR KSPSPVQGSQDTQRYSC

>Onts-SAA XP\_024301302.1 chr.14 NC\_037110:47.875.406-47.879.660  
 APHSLHRHC IATQGTLYPKNIQLVMIDDVIVYYN S SAEQEAVVPEWLNHPEGIEFWQEV  
 HRNLKFNRYVMDTAVRVTSEHYNHSHDFYQAHGRCGWKSDGTTEAFMSHAYDGKDFV S F  
 DVSTRWTAAVSHAVFYKRKRETDLEDLVRLVIHYESGCIRWLEK LLEFSVTVREP KVPV  
 VSLFERPPHGN SKVEVTCHVTGFYPRAVQVDWLGAEGLPMVDGVNSGEVLPNGDGSYQLR  
 KSLTVPQEAQDTQSY SCLVLHSSIAGNITVTWAPKKNLANVLMAI VIIIVSVVLMLTVL F K  
 YLVWRRAVGKS

>Onts-SBAps no prediction chr.13 NC\_037109:70.437.457-70.441.973 pseudogene  
 HCIATQWILNPKLVHVMIDGVIVYLYNSSGKQEAVMPEWLNHPEGIEFWRD VNRNLNCN  
 RYVMDTAVRVTSEHYNH\*HRWLDYAWRSRSPSCVCY\*LKRPTDDLHLGGYVTFGFY P QAVQ  
 VEWLGAQGLPLVDRVSSGEVQPNGDGSYQLR KSPSPVQGSQDTQRYSC

>Onmy-SAA XP\_021437178.1 chr.24 NC\_035100:28.955.775-28.958.794  
 MITTILISFMQFSIVAPHS LHRHC IATQGTLYPKNIQLVMIDDVIVYYN S SAEQEAVVP  
 EWLNHPEGIEFQEVHRNLKFNRYVMDTAVRVTSEHYNHSHDFYQAHGRCGWKSDGTTE  
 AFMSHAYDGKDFV SFDVSTRWTAAVSHAVFYKRKRETDLEDLVRLVIHYESGCIRWLEK  
 LLEFSVTVREP KVPVAVSLFERPPHGNSEVEVTCHVTGFYPRAVQVEWLGAEGLPMVDGVN  
 SGEVLPNGDGSYQLR KSLTVPQEAQDTQSY SCLVLHSSIAGNITVTWAPKKNLANVLMAI  
 VIIIVSVVLILT VLVFKYL VWRRAVAQNPR

>Onmy-SBAps no orf predicted chr.27 NC\_035103:34.982.134-34.984.099 pseudogene  
 HCIATQWILNPKLVHVMIDDVIVYSYNSSGKQEAVMPEWLNHPEGIEFWWD VNRNLNCN  
 RYVMDTAVRVTSEHYNH\*HYVTGFY P QAVQVEWLGAQGLPLVDRVSSGEVLPNGDSTEEE  
 PECPTGIPGHPEIQLLHSGVARNITVT

## AF4. Deduced amino acid sequences

>Satr-SAA XP\_029629540.1 chr.13 NC\_042969.1:77.567.602-77.570.818  
MITTILISFMQFSIVAPHSLHRHCIAQTGTLYPKNIQLVMIDDVTVYYYNSSAEQEAVVP  
EWLNHPEGIEFWQEVNRNLKFNRFVMDTAVRVTSEHYNHSHDFYQAHGRCGWKSDGTTE  
AFMSHAYDGKDFVSVFVSTRTWTAAAGSHAVFYKRRKRETDLEDLVRLLVIHYESGCIRWLEK  
LLQLSVTFRKPKVPAVSLFERPPHGNSEVEVTCHVTGFYPRAVQVEWLGAEGLPMVDGVS  
SGEVLPNGDGSYQLRKSLTVPQEAQDTQSYSCVLVHSSIAENITLTWAPKKNLANVLMIAI  
VIIIVSVVLILTTLVLFKYLVRRAVA  
>Satr-SAA2pt XP\_029629541.1 chr.13 NC\_042969.1:77.576.696-77.578.445  
MQVEWLGAEGLPMVDGVSSGEVLPNGDGSYQLRKSLTVPQEAQDTQSYSCVLVHSSVAGN  
ITLTWVPKTRSSFWDRIVTVIGC  
>Satr-SBAps no prediction chr.26 NC\_042982:33.079.931-33.082.983 pseudogene  
HCIATQWILNPKLFQLMIDDVIVY\*YNSGAEQRAVMPPEWLNHPEGIEFWRDVNRNLNLCN  
RYVMDTAVRVTSEHYNH\*HHVTGFYQAVQVEWLGAPGLPLVDRVSRGEVLPSPGDGSYQL  
GSQDTQRYSQVHSSVARITVTW  
>Sasa-SAA1 XP\_014039590.1 NW\_012348808:12.841-15.855  
MITTILISFMQFSIVAPHSLHRHCIAQTGTLYPKNIQLVMIDDVTVYYYNSSAEQEAVVP  
EWLNHPEGIEFWQEVNRNLKFNRFVMDTAVRVTSEHYNHSHDFYQAHGRCGWKSDGTTE  
AFMSHAYDGKDFVSVFVSTRTWTAAVSHAVFYKRRKRETDLEDLVRLLVIHYESGCIRWLK  
LLQFVSVTFREPKVPAVSLFERPPHGNSEVEVTCHVTGFYPRAVQVEWLGAEGLPMVDGVS  
SGEVLPNGDGSYQLRKSLTVPQEAQDTQSYSCVLVHSSIAGNITVTWAPKKNLANVLMIAI  
VIIIVSVVLILTTLVLFKYLVRRAVAVGKSQS  
>Sasa-SAA2 XP\_014044169.1 NW\_012366222:207-2.911  
APHSLHRHCIAQTGTLYPKNIQLVMIDDVTVYYYNSSAEQEAVVPEWLNHPEGIEFWQEV  
NRNLKFNRFVMDTAVRVTSEHYNHSHDFYQAHGRCGWKSDGTTEAFMSHAYDGKDFVSVF  
DVSTRTWTAAVSHAVFYKRRKRETDLEDLVRLLVIHYESGCIRWLKLLQFVSVTFREP  
VPAVSLFERPPHGNSEVEVTCHVTGFYPRAVQVEWLGAEGLPMVDGVSSGEVLPNGDGSYQL  
KSLTVPQEAQDTQSYSCVLVHSSIAGNITVTWAPKKNLANVLMIAI VIIIVSVVLILTTLV  
LFKYLVRRAVAVGKSQS  
>Sasa-SAA3pt XP\_014044525.1 NW\_012370682:1.054-1.564  
VPAVSLFERPPHGNSEVEVTCHVTGFYPRAVQVEWLGAEGLPMVDGVSSGEVLPNGDGSY  
QLRKSLTVPQEAQDTQSYSCVLVHSSIAGNITVTWAPKKNLANVLMIAI VIIIVSVVLILT  
TLVLFKYLVRRAVAVGKSQS  
>Sasa-SAA4 XP\_014043725.1 NW\_012363096:2.586-5.597  
MITTILISFMQFSIVAPHSLHRHCIAQTGTLYPKNIQLVMIDDVTVYYYNSSAEQEAVVP  
EWLNHPEGIEFWQEVNRNLKFNRFVMDTAVRVTSEHYNHSHDFYQAHGRCGWKSDGTTE  
AFMSHAYDGKDFVSVFVSTRTWTAAVSHAVFYKRRKRETDLEDLVRLLVIHYESGCIRWLK  
LLQFVSVTFREPKVPAVSLFERPPHGNSEVEVTCHVTGFYPRAVQVEWLGAEGLPMVDGVS  
SGEVLPNGDGSYQLRKSLTVPQEAQDTQSYSCVLVHSSVAGNITLTWAPKKNLANVLMIAI  
VIIIVSVVLILTTLVLFKYLVRRAVAVGKSQS  
>Sasa-SAA5pt XR\_001327798.1 NW\_012573932:108-952  
APHSLHRHCIAQTGTLYPKNIQLVMIDDVTVYYYNSSAEQEAVVPEWLNHPEGIEFWQEV  
NRNLKFNRFVMDTAVRVTSEHYNHSHDFYQAHGRCGWKSDGTTEAFMSHAYDGKDFVSVF  
>Sasa-SAA6pt XR\_001326745.1 NW\_012361613:51-929  
APHSLHRHCIAQTGTLYPKNIQLVMIDDVTVYYYNSSAEQEAVVPEWLNHPEGIEFWQEV  
NRNLKFNRFVMDTAVRVTSEHYNHSHDFYQAHGRCGWKSDGTTEAFMSHAYDGKDFVSVF  
DVSTRTWTAAVS  
>Eslu-SAA XP\_010891190.1 chr.01 NC\_025968.4:29.672.471-29.675.989  
MITTLVVLFLQLSIVDPHTFHRHCIAQTGTLYPKNIQLVMIDDVTVYYYNSSAEQDAIIP  
EWMHSEGIEFWREMHNKLNRFVMDSAVKMTSEHFNHSHDHIYQAHGRCGWRSDGSID  
ASMSHAYDGKDFVSVFVSTRTWTAAVSHAAFYKRRKRETDLEDLVRLLVIHYESGCIRWLEN  
LLKFSIKVREPKEVIVFERLPHGSSEVEVTCHVTGFYPRAVQVEWIGSEGLPLVDRVI  
SGEVLPNGDGSYQLRKSLTVLQGVQYNQSYTCLVHSSVTSVTSVTVWVWPKKNLNYMVI  
AVCIIVAVTFLFILAVLYKAGVIGHFR

### AF4.5 Deduced H lineage amino acid sequences

>Saa1-HAA XP\_023833862.1 chr.32 NC\_036871:14.212.450-14.221.846  
MRIPLTFILFFKLSWGLPIDTVILFQRSGVVGEMETVEQVLVNGAPLSNCGKYVSGILRA  
VLLGNYSESFQQAFEIENVTNTMTKNPTYQYLRVRECKLNGFRVHLTDQLLVNGNDFL  
TLDQSTDTWTAEVPAQALSILKQLWDWDTERTRRERMQLHESCTELMELTQSEPTTNGAGTS  
LLTVLAPLFLAGLAFVAVVIASFLISQQDPKVSHPGGVGLSIVHYPQNVTTETPQAPQSGK

## AF4. Deduced amino acid sequences

XNQVL

>Saal-HBA chr.19 XP\_023865004.1 NC\_036859:27.504.960-27.509.583  
 MRLPLTFILICELCWGFKRDMVIQFQRSGVVGEVEQVLINGAALFSCEKDVNGILRAVLL  
 GNYSESFQQAFAEIEENVNNTMTKNHTYQYLRVHESKLDGFRVVHLTXRLLVDGNYFLTLD  
 RNTDTWTAKVPQALALKQLWDQDTEGMRLERIQLHESCAKLMKELKHSEPTTTGGGMSML  
 AALASLLAGLAFVALVTTSFLIFKQQDPNVSGHPGGSVLGSIHVHPQNVTTETPRPGKGYQV  
 L

>Onne-HAA XP\_029498320.1 chr.9b NC\_042563:14.569.407-14.582.882  
 MLLPLTFILFFNLSWGLPIDTVILFQRSGVVGEMETVEQVLVNGAPSSSGKNVSGILRA  
 VLMGNYESFHQAFAEIEEVTNTMTSREKPTYQYLRVRECKLNGFRVVHSTDQLLVNDNFL  
 TLDQSTDTWTAEVPQALSLKQLWDWDEFTTRREKMLHEICTELMKELRQSEPTTNRGTS  
 LLTVLAPLFACTLFVVMVIASFLISKQQDPRVSRHPGGVLSIVHYYPQNVTTETQSGKDYQ  
 GPLKLNPPPLIHL

>Onne-HBA XP\_029479749.1 chr.20 NC\_042554:60.651.094-60.662.234  
 MRLPLTFILICELCWGFKRDMVIQFQRSGVVGEVEQVLINGAALSSCEKDVNGILRAVLL  
 GNYSESFQQAFAEIEEHNNTMTKNHTYQYLRVHESKLDGFRVVHLTDRLLDVNDNFLD  
 RNTDTWTAEVPQALALKHLWDQDTERTRLERIQLHESCAKLMKELTHSEPIITGGGMSML  
 AALASLLAGLAFVALVTTSFLIFKQQDPNVSGHPGGVLSIVHYYPQNVTTETPCPGKGYQV  
 L

>Onki-HAA XP\_020322949.1 chr.30 NC\_034203:14.721.044-14.737.299  
 MLLPLTFILFFNISWGLPIDTVILFQRSGVVGEMETVEQVLVNGAPSSGGKNVSGILRA  
 VLMGNYESFQQAFAEIEENVSNMTKNPTYQYLRVRECKLNGFRVVHSTDQLLVNGNYFLT  
 LDQSTDTWTAEVPQALSLKRLWDWDEFTTRREKMLHESCTELMKELRHSEPTTNRGTSL  
 LTVLASLFACTLFVVMVIASFLMSKQQDPRVSRHPGGVLSIVHYYPQNVTTETQGGKDY

>Onki-HBA XP\_031663205.1 chr.27 NC\_034200:28.309.378-28.315.392  
 MRLPLTFILICELCWGFKRDMVIQFQRSGVVGEVEQVLINGAALSSCEKDVNGILRAVLL  
 GNYSESFQQAFAEIEENVNNTMTKNHTYQYLRVHESKLDGFRVVHLTDRLLDVNDNFLD  
 RNTDTWTAEVPQALALKHLWDQDTERTRLERIQLHESCAKRMKELTHSEPIITGVPCLTS  
 YEAGESGEFLLCFQGGMSMLAALASLLAGLALVAMVTTSFLIFKQQDPNVSGHPGGVLS  
 IVHYYPQNVTEKPCPGKGYQVL

>Onts-HAA XP\_024291244.1 chr.10 NC\_037106:35.188.051-35.172.011  
 MLLPLTFILFFNLSWGLPIDTVILFQRSGVVGEMETVEQVLVNGAPSSGGKNVSGILRA  
 VLMGNYESFQQAFAEIEENVNTNTMTKNPTYQYLRVRECKLNGFRVVHSTDQLLVNGNDFLT  
 LDQSTDTWTAEVPQALSLKQLWDWDEFTTRREKMLHESCTELMKELRHSEPTTNRGTSL  
 LTVLAPLFACTLFVVMVIASFLMSKQQDPRVSRHPGGVLSIVHYYPQNVTTETQSGKDYQA

>Onts-HBA XP\_024247562.1 chr.28 NC\_037124:27.560.431-27.566.291  
 MRLPLTFILICELCWGLKRDMDVIQFQRSGVVGEVEQVLINGAALSSCEKDVNGILRAVLL  
 GNYSESFQQAFAEIEENVNNTMTKNHTYQYLRVHESKLDGFRVVHLTDRLLDVNDNFLD  
 RNTDTWTAEVPQALALKHLWDQDTERTRLERIQLHESCAKRMKELTHSEPIITGVPCLTS  
 YEAGESGEFLLCFQGGMSMLAALASLLAGLAFVAMVTTSFLIFKQQDPNISGHPGGVLS  
 IVHYYPQNVTTETPCPGKGYQVL

>Onmy-HAA XP\_021468778.1 chr.08 NC\_035084:52.834.866-52.853.052  
 MQLPLTFILFFNLSWGLPIDTVILFQRSGVVGEMETVEQVLVNGAPLSGSGKYVSGILRA  
 VLMGNYESFQQAFAEIEENVNTNTMTKNPTYQYLRVRECKLNGFRVVHSTDQLLVNGNDFLT  
 LDQSTDTWTAEVPQALSLKQLWDWDEFTTRREKMLHESCTELMKELRHSEPTTNRGTSL  
 LTVLAPLFACTLFVVMVIASFLISKQRDPRVSRHPGGVLSIVHYYPQNVTTETQSGKDYQA  
 L

>Onmy-HBA XR\_002471367.1 chr.28 NC\_035104:26.645.362-26.651.156  
 MRLPLTFILICELCWGFKVDMVIQFQRSGVVGEVEQVLINGAALSSCEKDVNGILRAVLL  
 GNYSESFQQAFAEIEENVNNTMTSRPHESKLDGFPVVHLTDRLLDVNDNFLDRLNNTDTWT  
 AEVPQALALKHLWDQDTERTRLERIQLHESCAKLMKELTHSEPIITPAGVLSIVHYYPQNV  
 TETPCPGKGYQVL

>Satr-HAA XP\_029560449.1 chr.21 NC\_042977: 17.473.705-17.488.093  
 MRLPLTFILFFKLNWGLPIDTVILFQRSGVVGEMETVEQVLVNGAPLSSCGKYVSGILRA  
 VLLGNDSESFQQAFAEIEENVNTNTITKNPTYQYLRVRECKLNGFRVVHLTDQLLVNGNYFL  
 TLDQSTDTWTAEVPQALALKQLWDWDEFTTRRERMQLHESCTELMKELTHSEPTTNRMS  
 LLTVLAPLLASLAFVAVVIASFLIANRQDPRVSGHPGGVLSIVHYYPQNVTTETPQAPQSG  
 KDYQVL

>Satr-HBAs no prediction chr.31 NC\_042987:27.983.152-27.989.933 pseudogene  
 VDMVIQFQRSEVVEVETVEQGLISGAALSSCEKDVSGILRAVLLGNYSESFQQAFAEIEE  
 NVNNTMTENHTYQYLRVHESKLDGFPVVHLTDQLLVNDNFLDRLNNTDTWTAEVPQALA  
 LKQL\*DQDTERTRLERIQLHESCAKLMKELTHSEPTTTPAGVLSIVHYYPQNVTTETPRPGK  
 GYQVL

>Sasa-HAA XP\_013995094.1 chr.14 NC\_027313.1:16.479.536-16.491.787

MRLPLTFILFFKLNWGLPIDTVILFQRSGVVGEMDTVEQVLVNGAPLSSCGKYVSGILRA  
 VLLGNDSESFQQAFEMEENVNTNITKNPTYQYLRVRECKLNGFRVVHLTDQLLVNGSDFL  
 TLDQSTVTWTAIEVPQALALKQLWDWDTERRRERMQLHESCTELMKELTHSEPTTNRAGM  
 SLLTVLAPLLASLAFVAVVIASFLIANRQDPRVSGHPGGVLGSIVHYQPQNVTTETPQAPQS  
 GKDYQVL  
 >Sasa-HBAps chr.03\_NC\_027302.1:17.030.685-17.037.352 pseudogene  
 VDMVIQFQRSGVVGVEVKTVEQVLISGAALSSSEKDVSGILRAVLLGNYSESFQQAFEIEE  
 NVNNTMTENHTYQYLRVHESKLDGFGVHVHLTDQLLVDRNDFTLDRNTDTWTAIEVPQALA  
 LKQL\*DQDTERTRLDRIQHESCAKLMKEITHSEPTTPAGVLGSIVHYQPQNVTTETPRPGK  
 GYRVL  
 >Eslu-HAA XP\_010881876.1 chr.03 NC\_025970:32.751.310-32.757.904  
 MIANMQLPLITILFKSCLCLQIDTVIQFLRSGVFGKVETVEQVLVNGAPLSSCGKDVSS  
 ILNAVLLINYNESFQTIIEESGNNTMKISHTYMRVRECKLDSFGVLLLTDRLLVDGNNFLT  
 LDRATDTWTAIEGPQALPLKHLWDRESTRTRREIMQLHESCTKLLEEITCSEPGATGGMDI  
 PTALAPLLAGLGFVILVIASFLISKQDPTISGHPGGVIGSIIHYPHNISELSHSPNPGR  
 GYQVL

#### AF4.6 Deduced P lineage amino acid sequences

>Saal-PAapt No prediction chr.03 NC\_036840:4.724.783-4.724.090  
 VLQRRRGCTYITNESSTGFDQWGLNGENFLTFDPTSHWTMSESPQANPIEPSWNSNKVRS  
 HVFKEFLQHDIPHKEDVSLRCHGTSTDLRKVHLTRDRVMTDRVRVIGPLPNVDGSVLLR  
 L  
 >Onne-PAAs No prediction chr.08 NC\_042542:3.503.547-3.504.250 pseudogene  
 VLQRRRGCTYITNESSAGFDQWGLNGENFLTFDPTSHWTMSESLQANPIEQSWNSNKVRS  
 HMFKEFLQDDLPKEDVSLTCHVTSTDLGSLKVHLTRDRVMTDRVRVIGPLPNVAGSFL  
 LRLSVEIPTGLTKT\*RYRCKVQTSTSNATA  
 >Onki-PAAs No prediction chr.09 NC\_034182:5.596.843-5.596.152 pseudogene  
 VLQRRRGCTYITNESSAGFDQWGLNGENFLTFDPTSHWTMSESLQANPIEQSWNSNKVRS  
 MFKEFLQDDLPKEDVSLRCHVTSTDLKVHLTRDRVMTDRVRVIGPLPNVAGSFLRLS  
 VEIPTGLTKT\*RYRCKVQTSTSNATA  
 >Onts-PAAs No prediction chr.15 NC\_037111:3.386.312-3.386.578 pseudogene  
 SMIFKFAKPIPHKEDVSLRCHVTSTDLGSLKVHLTRDRVMTDRVRVIGPLPNVAGSFL  
 LRLSVEIPTGLTKT\*RYRCKLQTSTSNATA  
 >Onmy-PAAs No prediction chr.21 NC\_035097:14.167.986-14.168.685 pseudogene  
 VLQRRRGCTYITNESSAGFDQWGLIGEN\*LTFDPTSHWTMSESLQANPIEQSWNSNKVRS  
 HLFKEFLQDDLPKEDVSLRCHVTSTDLGSLKVHLTRDRVMTDRVRVIGPLPNVDGSVL  
 LRLSVEIPTGLTKT\*RYRCKVQTSTSNATA  
 >Satr-PAAs No prediction chr.08 NC\_042964:41.135.886-41.136.011 pseudogene  
 IGPLPNVDGSVLLRLSVEIPTGHTKS\*RYRCKVQTSTSNATA  
 >Sasa-PAAs No prediction chr.07 NC\_027306.1:43.236.079-43.236.783 pseudogene  
 VLQRRRGCTYITN\*SSTGFGQ\*GLNGENFLTFDPTSHWTMSESLQANPIEQSWNSNKVRS  
 HMFKEFLQHDVCPH\*EDVSLRCHVTSTDLGSLKVHLTRDRVMTDRARVIGPLPNVDGSVL  
 LRLSVEIPTGHTKS\*RYHCKVQTSTSNATA
